# Supplementary material for: Oxidative nitrene transfer from azides to alkynes via Ti(ii)/Ti(iv) redox catalysis: formal [2+2+1] synthesis of pyrroles
Source: Royal Society of Chemistry journal article supplement (doi:10.1039/c8cc02623h), 2018-01-01
Supplement: c8cc02623h1.pdf [file c8cc02623h1.pdf]

**Oxidative Nitrene Transfer from Azides to Alkynes via Ti(II)/Ti(IV) Redox Catalysis:  
Formal [2+2+1] Synthesis of Pyrroles**

Adam J. Pearce, Xin Yi See and Ian A. Tonks\*

*Contribution from the Department of Chemistry, University of Minnesota – Twin  
Cities, 207 Pleasant St SE, Minneapolis MN 55455. E-mail: [itonks@umn.edu](mailto:itonks@umn.edu)*

## Table of Contents

|                                                                                                                                                   |    |
|---------------------------------------------------------------------------------------------------------------------------------------------------|----|
| General considerations .....                                                                                                                      | 5  |
| General procedure for catalytic reactions .....                                                                                                   | 5  |
| Internal alkyne screen .....                                                                                                                      | 5  |
| Azide screen.....                                                                                                                                 | 5  |
| Terminal alkyne screen .....                                                                                                                      | 5  |
| Characterization of starting materials in C <sub>6</sub> D <sub>5</sub> Br .....                                                                  | 6  |
| Triphenylmethane.....                                                                                                                             | 6  |
| ( <i>p</i> -tolyl)azide (1a).....                                                                                                                 | 6  |
| 1-azidoadamantane (1b) .....                                                                                                                      | 7  |
| 1-azidodecane (1c) .....                                                                                                                          | 8  |
| Benzylazide (1d).....                                                                                                                             | 8  |
| Azidomethyl phenyl sulfide (1e) .....                                                                                                             | 9  |
| Trityl azide (1f) .....                                                                                                                           | 10 |
| 2-butyne (2b) .....                                                                                                                               | 10 |
| Diphenylacetylene (2c).....                                                                                                                       | 11 |
| 1-Phenyl-1-propyne (2d) .....                                                                                                                     | 12 |
| ( <i>p</i> -tolyl)acetylene (2f).....                                                                                                             | 13 |
| ( <i>t</i> -butyl)acetylene (2g).....                                                                                                             | 14 |
| (Trimethylsilyl)acetylene (2h).....                                                                                                               | 15 |
| 1,7-octadiyne (2i) .....                                                                                                                          | 15 |
| Characterization of uncatalyzed triazole products in C <sub>6</sub> D <sub>5</sub> Br .....                                                       | 17 |
| 1-( <i>p</i> -tolyl)-4,5-(diethyl)-1,2,3-triazole (6aa) .....                                                                                     | 17 |
| 1-adamantyl-4,5-di(ethyl)-1H-1,2,3-triazole (6ba) (partial) .....                                                                                 | 18 |
| 1-adamantyl-4,5-di(methyl)-1H-1,2,3-triazole (6bb) (partial) .....                                                                                | 20 |
| 1-adamantyl-4,5-di(phenyl)-1H-1,2,3-triazole (6bc) (partial) .....                                                                                | 21 |
| 1-adamantyl-4-methyl-5-phenyl-1H-1,2,3-triazole and 1-adamantyl-5-methyl-4-phenyl-1H-1,2,3-triazole (6bd).....                                    | 23 |
| 1-adamantyl-4-( <i>n</i> -butyl)-1H-1,2,3-triazole and 1-adamantyl-5-( <i>n</i> -butyl)-1H-1,2,3-triazole (6be) (partial) .....                   | 25 |
| 1-adamantyl-4-( <i>p</i> -tolyl)-1H-1,2,3-triazole and 1-adamantyl-5-( <i>p</i> -tolyl)-1H-1,2,3-triazole (6bf) (partial) .....                   | 27 |
| 1-( <i>p</i> -tolyl)-4-( <i>t</i> -butyl)-1H-1,2,3-triazole and 1-( <i>p</i> -tolyl)-5-( <i>t</i> -butyl)-1H-1,2,3-triazole (6ag) (partial) ..... | 28 |
| 1-adamantyl-4-(trimethylsilyl)-1H-1,2,3-triazole (6bh).....                                                                                       | 30 |
| 1-adamantyl-4-(5-hexyn-1-yl)-1H-1,2,3-triazole (6bi) .....                                                                                        | 32 |
| 1-( <i>n</i> -decyl)-4,5-(diethyl)-1,2,3-triazole (6ca) (partial) .....                                                                           | 33 |

|                                                                                                          |    |
|----------------------------------------------------------------------------------------------------------|----|
| 1-(benzyl)-4,5-(diethyl)-1,2,3-triazole (6da) (partial) .....                                            | 35 |
| 1-(methyl phenyl sulfide)-4,5-(diethyl)-1,2,3-triazole (6ea) (partial) .....                             | 36 |
| Attempted reaction of trityl azide and 3-hexyne (6fa) in C <sub>6</sub> D <sub>5</sub> Br .....          | 38 |
| Characterization of cyclotrimerization byproducts in C <sub>6</sub> D <sub>5</sub> Br .....              | 39 |
| Hexamethylbenzene (9b) .....                                                                             | 39 |
| Attempted cyclotrimerization of diphenylacetylene (9c) .....                                             | 40 |
| 1,2,4-trimethyl-3,5,6-triphenylbenzene and 1,3,5-trimethyl-2,4,6-triphenylbenzene (9d) (partial) .....   | 41 |
| 1,3,5-tri( <i>p</i> -tolyl)benzene (9f) <sup>8</sup> .....                                               | 43 |
| 1,2,4-tri( <i>p</i> -tolyl)benzene (9f) <sup>9</sup> .....                                               | 43 |
| 1,3,5-tri( <i>t</i> -butyl)benzene and 1,2,4-tri( <i>t</i> -butyl)benzene (9g) .....                     | 44 |
| 1,3,5-tris(trimethylsilyl)benzene and 1,2,4-tris(trimethylsilyl)benzene (9h) .....                       | 45 |
| 1,4-bis(5,6,7,8-tetrahydronaphthalen-2-yl)butane (9i).....                                               | 46 |
| NMR analysis of initial catalytic run with ( <i>p</i> -tolyl)azide and 3-hexyne .....                    | 48 |
| NMR analysis of catalytic reactions with internal alkyne substrates (Table 1).....                       | 51 |
| NMR analysis of 3-hexyne and 1-azidoadamantane reaction (Table 1, Entry 1).....                          | 51 |
| NMR analysis of 1-azidoadamantane and 3-hexyne reaction (Table 1, Entry 2).....                          | 52 |
| Isolation of 2,3,4,5-tetraethyl-1-adamantyl-1 <i>H</i> -pyrrole .....                                    | 53 |
| NMR analysis of 2-butyne and 1-azidoadamantane reaction (Table 1, Entry 3) .....                         | 55 |
| NMR analysis of diphenylacetylene and 1-azidoadamantane reaction (Table 1, Entry 4) .....                | 56 |
| NMR analysis of 1-phenyl-1-propyne and 1-azidoadamantane reaction (Table 1, Entry 5) .....               | 58 |
| NMR analysis of 1-azidodecane and 3-hexyne reaction (Table 1, Entry 9) .....                             | 61 |
| Isolation of 2,3,4,5-tetraethyl-1-decyl-1 <i>H</i> -pyrrole .....                                        | 63 |
| NMR analysis of benzylazide and 3-hexyne reaction (Table 1, Entry 10).....                               | 64 |
| Isolation of 2,3,4,5-tetraethyl-1-benzyl-1 <i>H</i> -pyrrole .....                                       | 66 |
| NMR analysis of ( <i>p</i> -tolyl)azide and 3-hexyne reaction (Table 1, Entry 11) .....                  | 68 |
| NMR analysis of ( <i>p</i> -tolyl)azide and 3-hexyne reaction (Table 1, Entry 12) .....                  | 70 |
| NMR analysis of azidomethyl phenyl sulfide and 3-hexyne reaction (Table 1, Entry 13).....                | 71 |
| NMR analysis of trityl azide and 3-hexyne reaction (Table 1, Entry 14) .....                             | 72 |
| Table S1: Internal alkyne scope triazole yield, trimer yield and mass balance data .....                 | 74 |
| Table S2: 1-azidodecane optimisation conditions with 3-hexyne .....                                      | 75 |
| NMR analysis of catalytic reactions with terminal alkyne substrates (Table 2).....                       | 76 |
| NMR analysis of 1-hexyne and 1-azidoadamantane reaction (Table 2, Entry 1).....                          | 76 |
| NMR analysis of tolylacetylene and 1-azidoadamantane reaction (Table 2, Entry 2) .....                   | 79 |
| NMR analysis of ( <i>t</i> -butyl)acetylene and ( <i>p</i> -tolyl)azide reaction (Table 2, Entry 3)..... | 81 |
| NMR analysis of trimethylsilylacetylene and 1-azidoadamantane reaction (Table 2, Entry 4) ....           | 84 |

|                                                                                         |     |
|-----------------------------------------------------------------------------------------|-----|
| NMR analysis of 1,7-octadiyne and 1-azidoadamantane reaction (Table 2, Entry 5).....    | 86  |
| Table S3: Terminal alkyne scope triazole yield, trimer yield and mass balance data..... | 88  |
| Table S4: Azide scope with terminal alkynes.....                                        | 89  |
| Variable Time Normalization Data <sup>10</sup> .....                                    | 90  |
| Reaction Order in Azide.....                                                            | 90  |
| Reaction Order in Alkyne and Catalyst.....                                              | 95  |
| Initial Rates for <i>n</i> -decN <sub>3</sub> reaction with 3-hexyne.....               | 102 |
| References .....                                                                        | 104 |

### **General considerations**

All air- and moisture-sensitive reactions were carried out in a nitrogen-filled glovebox. Solvents for air- and moisture-sensitive reactions were i) deoxygenated by sparging with N<sub>2</sub> and dried by passing through activated alumina columns of a Pure Process Technology solvent purification system (PhMe), degassed, filtered through basic alumina and stored over molecular sieves prior to use (PhBr) and iii) vacuum transferred from CaH<sub>2</sub> (CDCl<sub>3</sub>). C<sub>6</sub>D<sub>5</sub>Br was synthesized following literature procedure,<sup>1</sup> degassed, dried over CaH<sub>2</sub>, and filtered through basic alumina prior to use.

Ti(N<sup>t</sup>Bu)Cl<sub>2</sub>py<sub>3</sub><sup>2</sup> and Ti(NTol)I<sub>2</sub>(THF)<sub>3</sub><sup>3</sup> were synthesized according to literature procedure. Liquid alkynes, azides and other reagents were freeze-pump-thaw degassed three times and passed through activated basic alumina prior to use.

<sup>1</sup>H and <sup>13</sup>C NMR spectra were recorded on Bruker Avance III HD 400 and 500 MHz spectrometers. Chemical shifts were referenced to the residual protio-solvent impurity for <sup>1</sup>H (s, 7.26 for CHCl<sub>3</sub>; s 7.30 ppm, 7.02 ppm and 6.94 ppm for C<sub>6</sub>D<sub>4</sub>HBr<sup>38</sup>) and solvent carbons for <sup>13</sup>C (t, 77.2 ppm for CDCl<sub>3</sub>). Qualitative GC MS spectra were recorded on a Agilent GC6890N-MSD5975 gas chromatograph-mass spectrometer fitted with a 7683 auto sampler. A HD-5 column (5% diphenyl siloxane in the polymer) was used in the gas chromatograph and electron ionization technique was used for mass spectrometry detection. GC chromatographs were collected on Agilent 7890B GC system equipped with the HP-5 column (30m, 0.32 mm, 0.25 μm, 7 inch cage), a oxidation-methanation reactor (Polyarc® System, Activated Research Company) and a FID detector for quantitative carbon detection.

### **General procedure for catalytic reactions**

For all reactions, 0.5 ml of the respective stock solution and the required reagents were added to a Teflon tape lined screw-cap NMR tube in a N<sub>2</sub>-filled glovebox. This was then sealed with a Teflon screw cap and heated at 80/115 °C for 2 – 16 h (internal alkyne scope, Table 1) and 6 h (terminal alkyne scope). Quantitative <sup>1</sup>H NMR spectra of the catalytic mixture were taken before and after heating on the Bruker Avance III HD 400 and 500 MHz spectrometers (Acquisition time = 5 s; delay time = 30 s; dummy scans = 0; number of scans = 8). Three different stock solutions were prepared with C<sub>6</sub>D<sub>5</sub>Br and triphenylmethane acting as an internal standard.

#### **Internal alkyne screen**

In each reaction, internal alkyne (1.0 mmol, 5 equiv.) and 0.5 ml of stock solution were added. Stock solution were prepared by adding Ti(NTol)(THF)<sub>3</sub>I<sub>2</sub> (10 mol %, 0.02 mmol), triphenylmethane (10 mol %, 0.02 mmol) and 1-azidoadamantane (0.2 mmol, 1.0 equiv.) to C<sub>6</sub>D<sub>5</sub>Br.

#### **Azide screen**

In each reaction, Ti(NTol)(THF)<sub>3</sub>I<sub>2</sub> (10 mol %, 0.01 mmol), azide (0.1 mmol, 1.0 equiv.) and 0.5 ml of stock solution were added. Reagents have to be added in this particular sequence to prevent trimerization from occurring prematurely. Stock solution was prepared by adding 3-hexyne (0.5 mmol, 5 equiv.) and triphenylmethane (20 mol %, 0.02 mmol) to C<sub>6</sub>D<sub>5</sub>Br.

#### **Terminal alkyne screen**

In each reaction, terminal alkyne (0.42 mmol, 2.1 equiv.), 1-azidoadamantane or (*p*-tolyl)azide (0.2 mmol, 1.0 equiv.) and 0.5 ml of stock solution were added. Stock solution was prepared by adding Ti(N<sup>t</sup>Bu)py<sub>3</sub>Cl<sub>2</sub> (10 mol %, 0.02 mmol), triphenylmethane (10 mol %, 0.02 mmol) to C<sub>6</sub>D<sub>5</sub>Br.

### Characterization of starting materials in C<sub>6</sub>D<sub>5</sub>Br

Characterization of 3-Hexyne (2a) and 1-Hexyne (2e) in C<sub>6</sub>D<sub>5</sub>Br were reported previously.<sup>3</sup>

### Triphenylmethane

<sup>1</sup>H NMR (500 MHz, C<sub>6</sub>D<sub>5</sub>Br):  $\delta$  7.15 (t,  $^4J_{HH} = 7.5$  Hz, 6H, Ar-H), 7.10 – 7.06 (m, 9H, Ar-H), 5.45 (s, 1H, C-H)

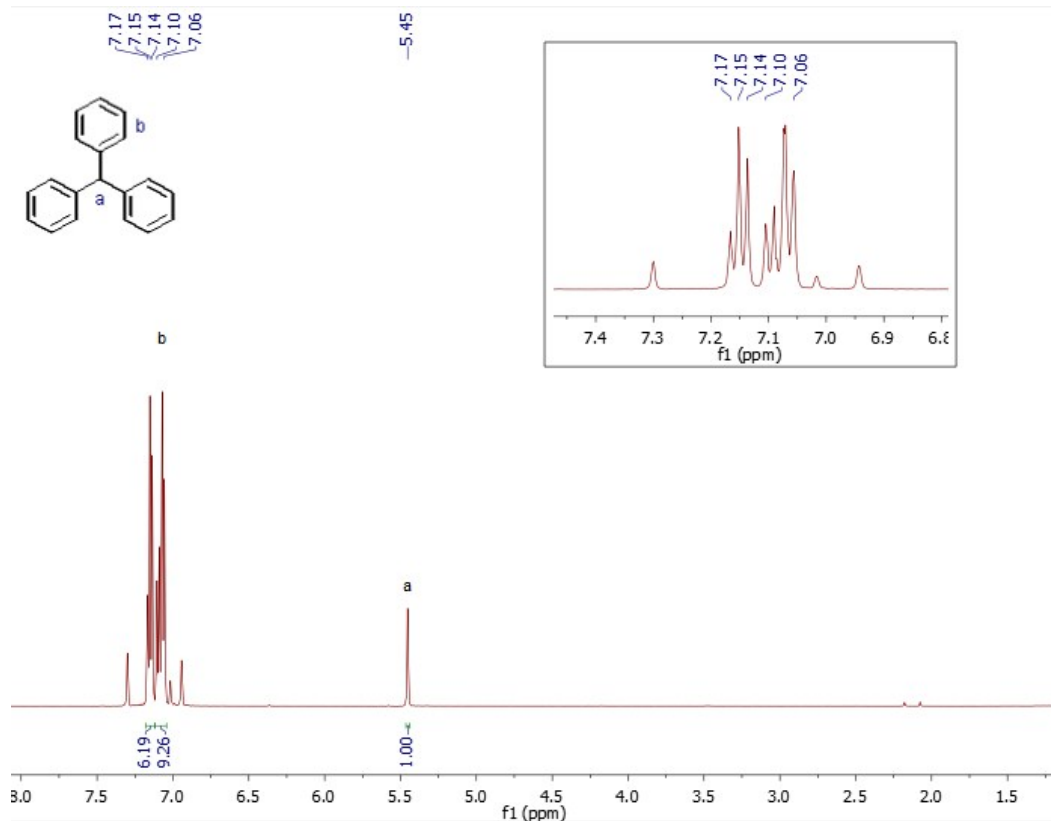

**Figure S1:** <sup>1</sup>H spectrum of triphenylmethane in C<sub>6</sub>D<sub>5</sub>Br.

### (*p*-tolyl)azide (1a)

(*p*-tolyl)azide was synthesized according to literature procedures.<sup>4</sup>

<sup>1</sup>H NMR (500 MHz, C<sub>6</sub>D<sub>5</sub>Br):  $\delta$  6.89 (d,  $^3J_{HH} = 7.9$  Hz, 2H, *o*-Tol-H), 6.74 (d,  $^3J_{HH} = 8.1$  Hz, 2H, *m*-Tol-H), 2.11 (s, 3H, CH<sub>3</sub>)

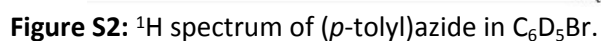

**<sup>1</sup>H NMR (500 MHz, C<sub>6</sub>D<sub>5</sub>Br):** δ 1.90 (br s, 3H, C-H), 1.64 (m, 6H, CH<sub>2</sub>), 1.45 (app q, <sup>3</sup>J<sub>HH</sub> = 12.4 Hz, <sup>3</sup>J<sub>HH</sub> = 15.8 Hz 6H, CH<sub>2</sub>)

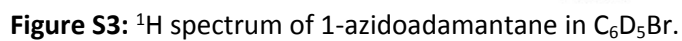

### 1-azidodecane (1c)

1-azidodecane was synthesized according to literature procedures.<sup>5</sup>

**<sup>1</sup>H NMR (500 MHz, C<sub>6</sub>D<sub>5</sub>Br):**  $\delta$  2.96 (t, 2H, H<sub>3</sub>C(CH<sub>2</sub>)<sub>8</sub>-CH<sub>2</sub>-N<sub>3</sub>), 1.39 – 1.34 (m, 2H, H<sub>3</sub>C(CH<sub>2</sub>)<sub>7</sub>-CH<sub>2</sub>-CH<sub>2</sub>N<sub>3</sub>), 1.29 – 1.25 (m, 2H, H<sub>3</sub>C(CH<sub>2</sub>)<sub>6</sub>-CH<sub>2</sub>-(CH<sub>2</sub>)<sub>2</sub>N<sub>3</sub>), 1.21 – 1.15 (m, 12H, H<sub>3</sub>C-(CH<sub>2</sub>)<sub>6</sub>-(CH<sub>2</sub>)<sub>3</sub>N<sub>3</sub>), 0.88 (t, 3H, H<sub>3</sub>C-(CH<sub>2</sub>)<sub>9</sub>N<sub>3</sub>)

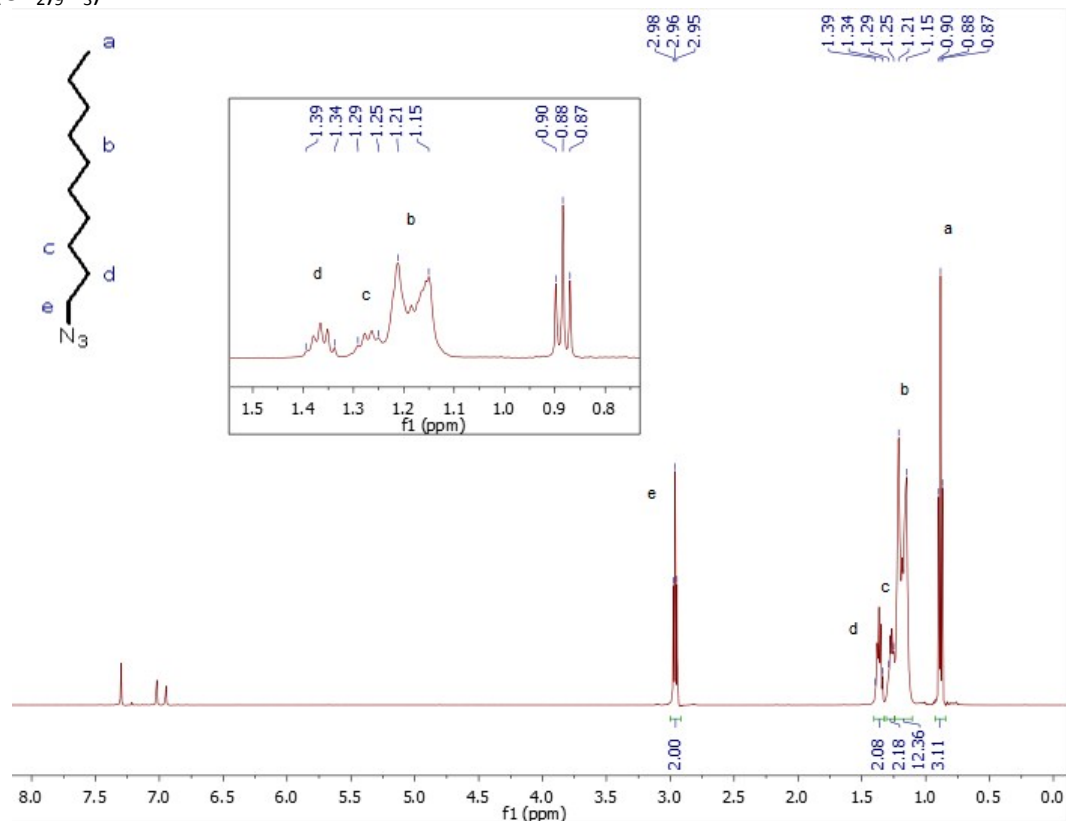

**Figure S4:** <sup>1</sup>H spectrum of 1-azidodecane in C<sub>6</sub>D<sub>5</sub>Br.

### Benzylazide (1d)

Benzylazide was synthesized according to literature procedures.<sup>6</sup>

**<sup>1</sup>H NMR (500 MHz, C<sub>6</sub>D<sub>5</sub>Br):**  $\delta$  7.18 – 7.13 (m, 3H, Ph-H), 7.07 – 7.06 (m, 2H, Ph-H), 3.99 (s, 2H, CH<sub>2</sub>)



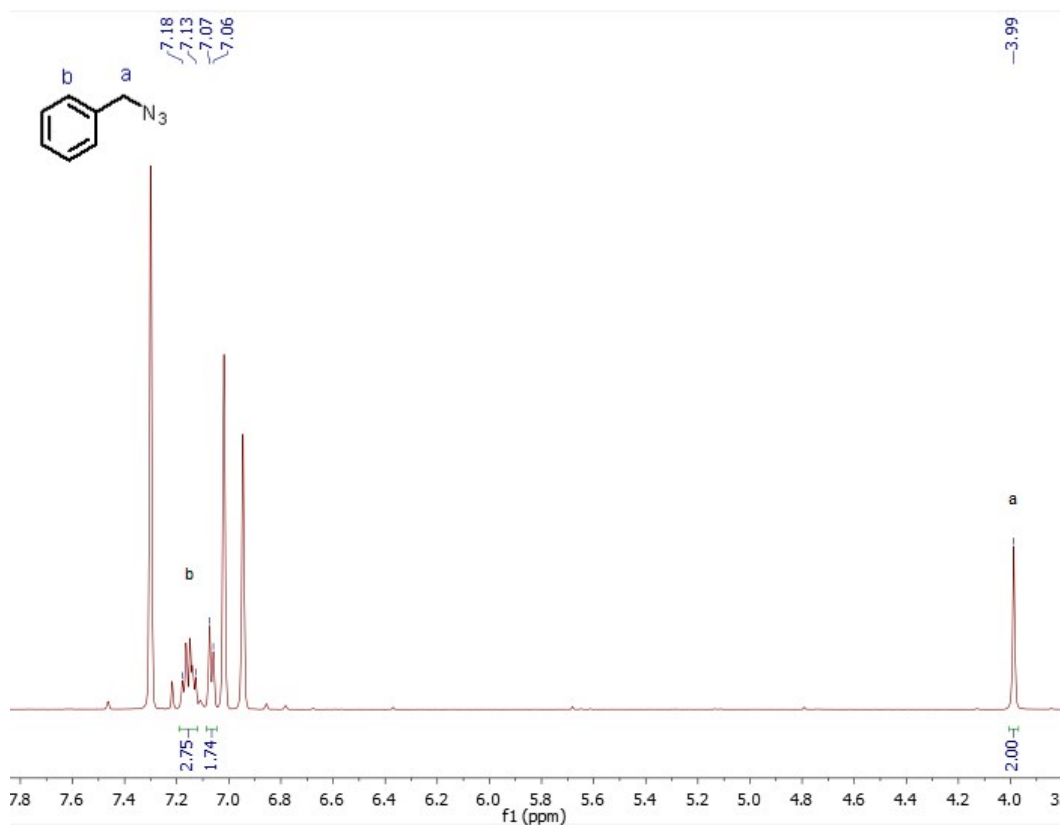

#### Azidomethyl phenyl sulfide (1e)

$^1\text{H}$  NMR (500 MHz,  $\text{C}_6\text{D}_5\text{Br}$ ):  $\delta$  7.33 (d,  $^3J_{\text{HH}} = 7.4$  Hz, 2H, *o*-Ph-H), 7.11 – 7.05 (m, 3H, *m*-Ph-H and *p*-Ph-H), 4.17 (s, 2H,  $\text{CH}_2$ )

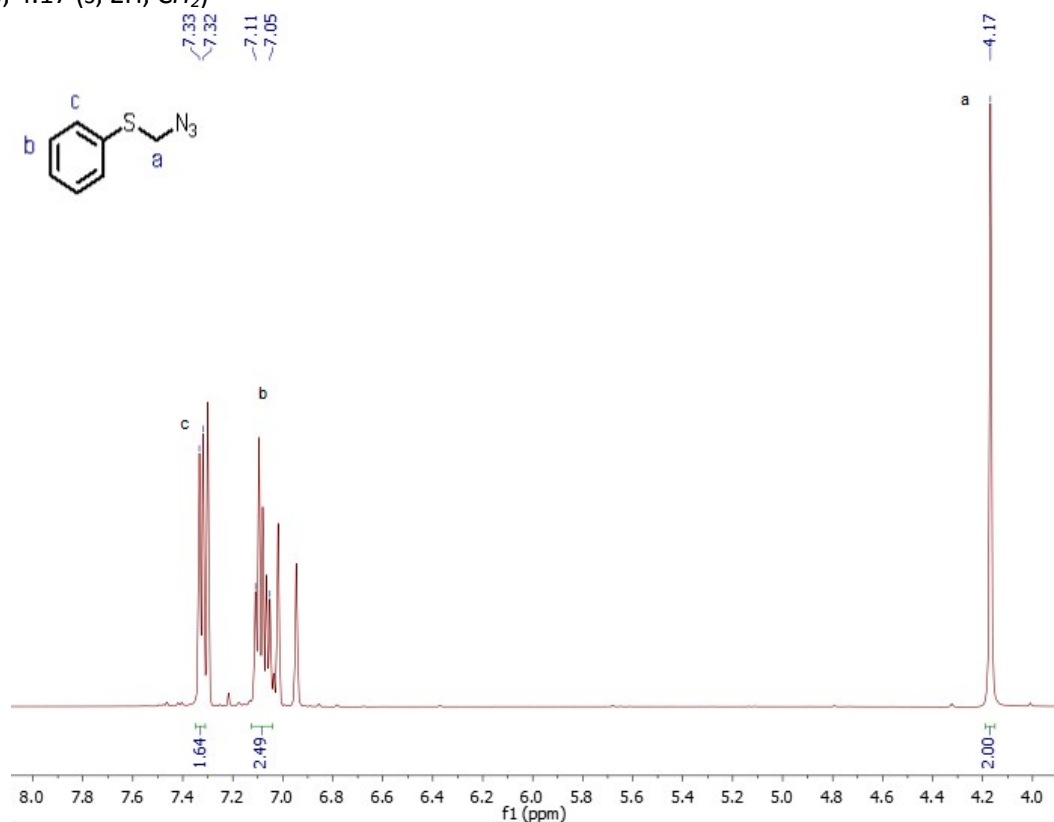

### Trityl azide (1f)

Trityl azide was synthesized according to the literature procedure<sup>7</sup> and used directly without any further purification.

**<sup>1</sup>H NMR (500 MHz, C<sub>6</sub>D<sub>5</sub>Br):**  $\delta$  7.27 (d,  $^3J_{HH} = 7.6$  Hz, 6H, *o*-Ph-*H*), 7.18 – 7.10 (m, 9H, *m*-Ph-*H* and *p*-Ph-*H*)

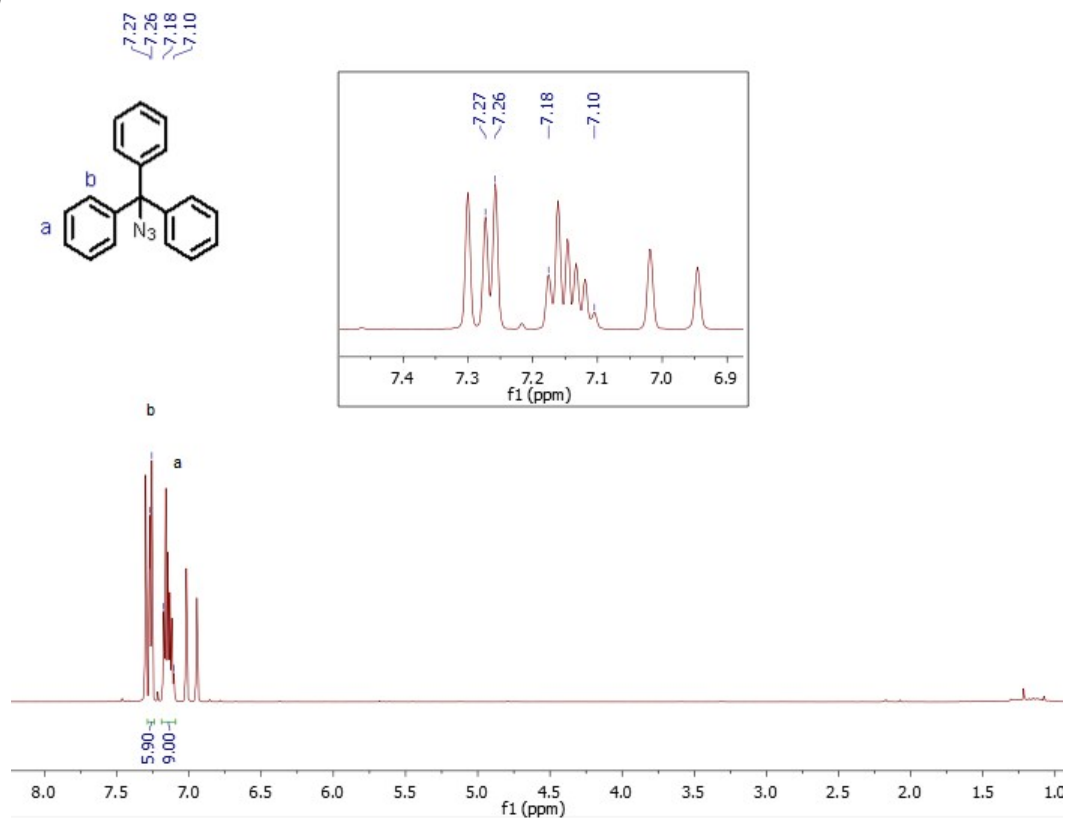

**Figure S7:** <sup>1</sup>H spectrum of trityl azide in C<sub>6</sub>D<sub>5</sub>Br.

### 2-butyne (2b)

**<sup>1</sup>H NMR (500 MHz, C<sub>6</sub>D<sub>5</sub>Br):**  $\delta$  1.60 (s, 6H, CH<sub>3</sub>)

The other peaks in the spectrum belong to 1-azidoadamantane.

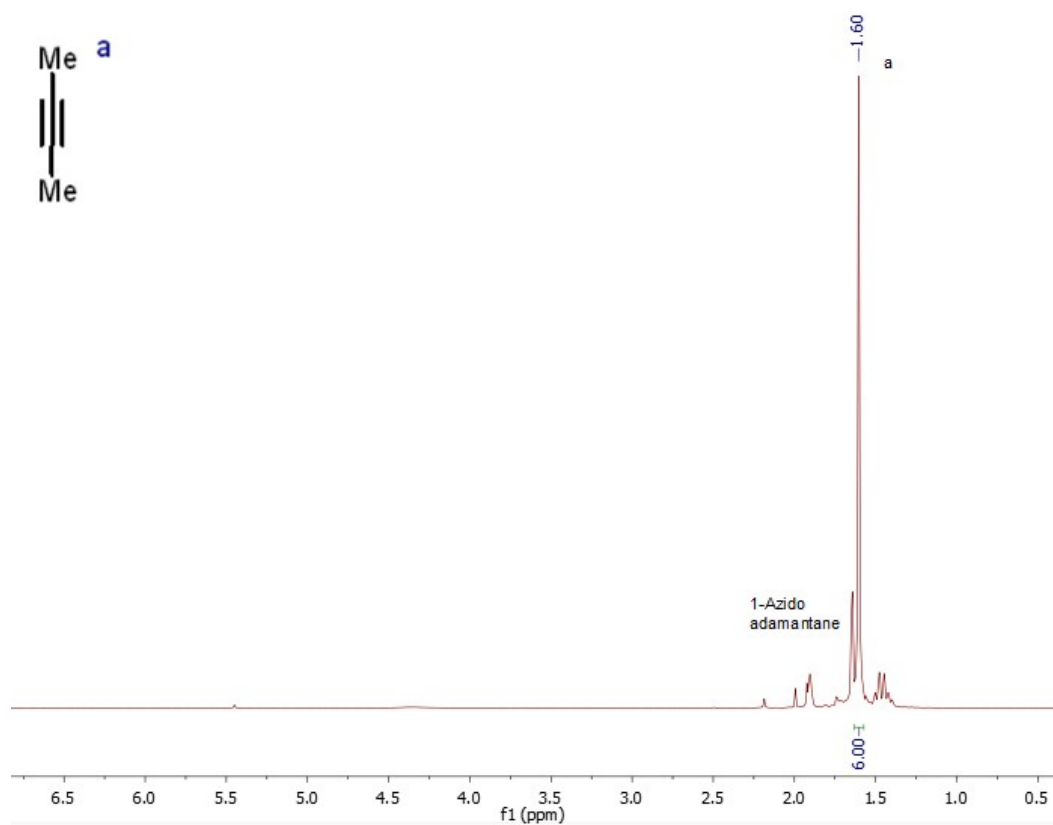

**Figure S8:** <sup>1</sup>H spectrum of 2-butyne in C<sub>6</sub>D<sub>5</sub>Br.

**Diphenylacetylene (2c)**

<sup>1</sup>H NMR (500 MHz, C<sub>6</sub>D<sub>5</sub>Br): δ 7.51 (d, <sup>3</sup>J<sub>HH</sub> = 7.2 Hz, 4H, *o*-Ph-*H*), 7.18 – 7.12 (m, 6H, *m*-Ph-*H* and *p*-Ph-*H*)

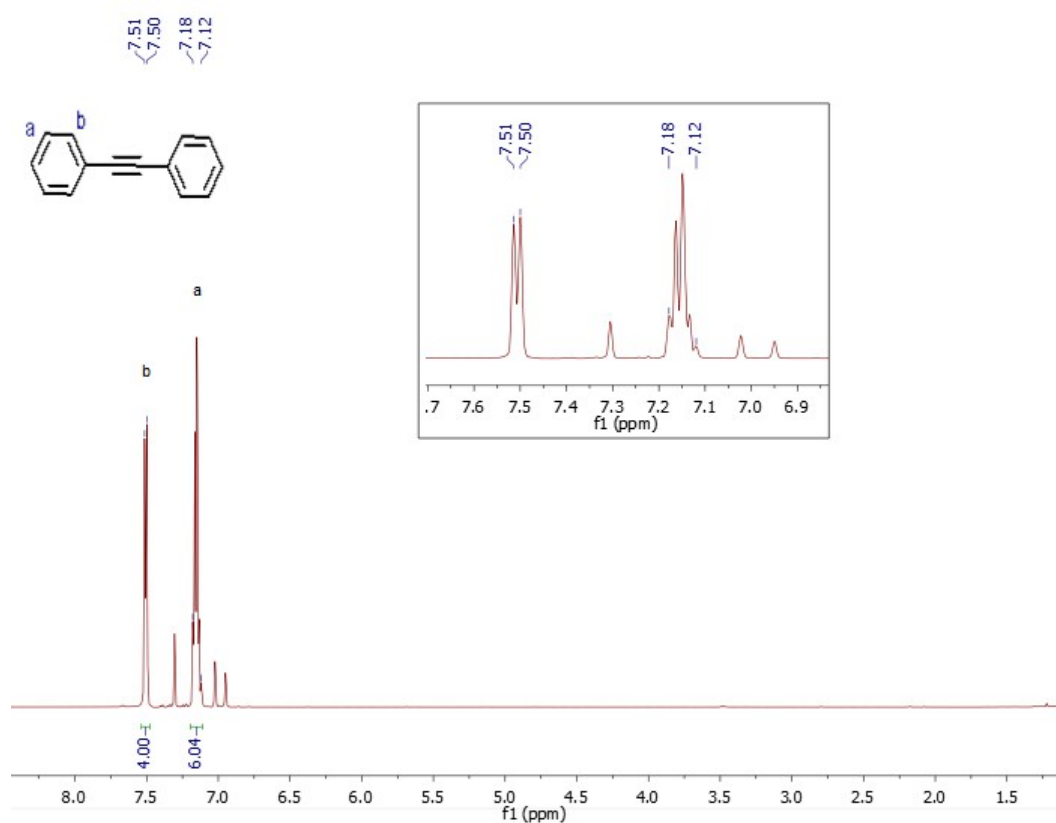

**Figure S9:**  $^1\text{H}$  spectrum of diphenylacetylene in  $\text{C}_6\text{D}_5\text{Br}$ .

**1-Phenyl-1-propyne (2d)**

$^1\text{H}$  NMR (500 MHz,  $\text{C}_6\text{D}_5\text{Br}$ ):  $\delta$  7.41 (d,  $^3J_{\text{HH}} = 6.8$  Hz, 2H, *o*-Ph-*H*), 7.13 – 7.09 (m, 3H, *m*-Ph-*H* and *p*-Ph-*H*), 1.84 (s, 3H,  $\text{CH}_3$ )

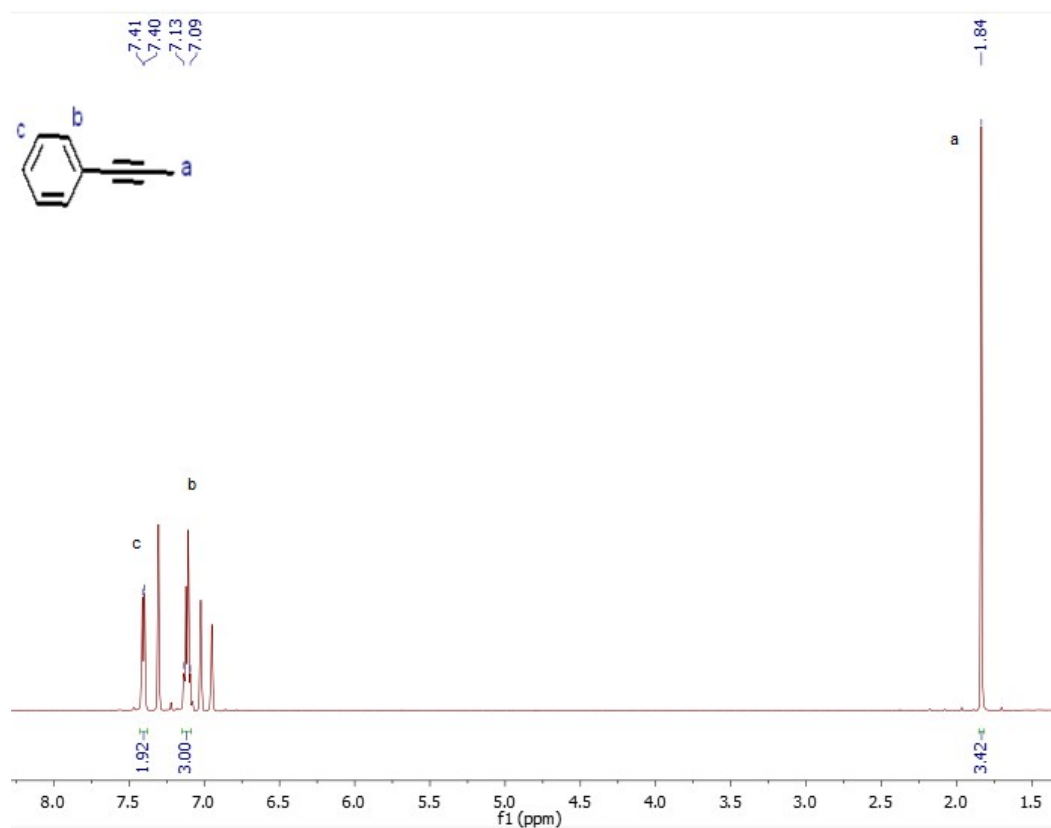

**Figure S10:** <sup>1</sup>H spectrum of 1-phenyl-1-propyne in C<sub>6</sub>D<sub>5</sub>Br.

**(*p*-tolyl)acetylene (2f)**

<sup>1</sup>H NMR (400 MHz, C<sub>6</sub>D<sub>5</sub>Br): δ 7.32 (d, <sup>3</sup>J<sub>HH</sub> = 8.1 Hz, 1H, *m*-Tol-*H*), 6.88 (d, <sup>3</sup>J<sub>HH</sub> = 8.2 Hz, 1H, *o*-Tol-*H*), 2.95 (s, 1H, Tol≡H), 2.10 (s, 2H, Ar-CH<sub>3</sub>)

The other peaks in the spectrum belong to 1-azidoadamantane.

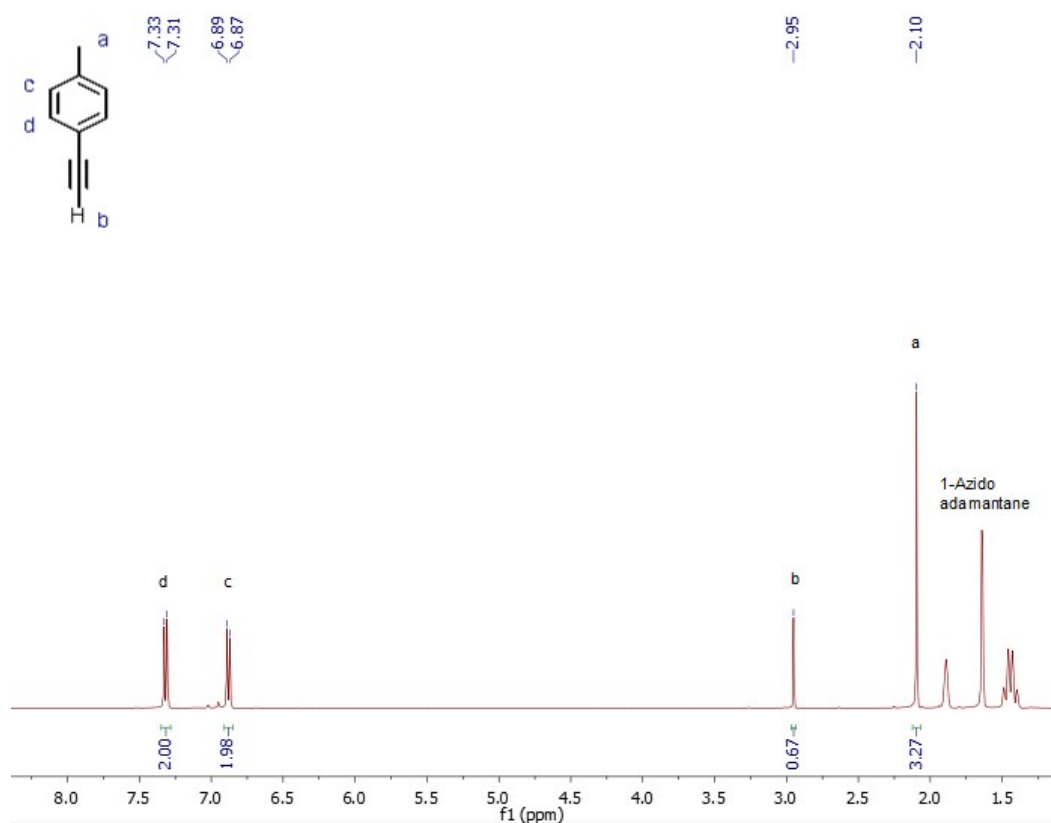

Figure S11: <sup>1</sup>H spectrum of *p*-tolylacetylene in C<sub>6</sub>D<sub>5</sub>Br.

**(*t*-butyl)acetylene (2g)**

<sup>1</sup>H NMR (500 MHz, C<sub>6</sub>D<sub>5</sub>Br): δ 2.02 (s, 1H, <sup>*t*</sup>Bu≡H), 1.16 (s, 9H, <sup>*t*</sup>Bu)

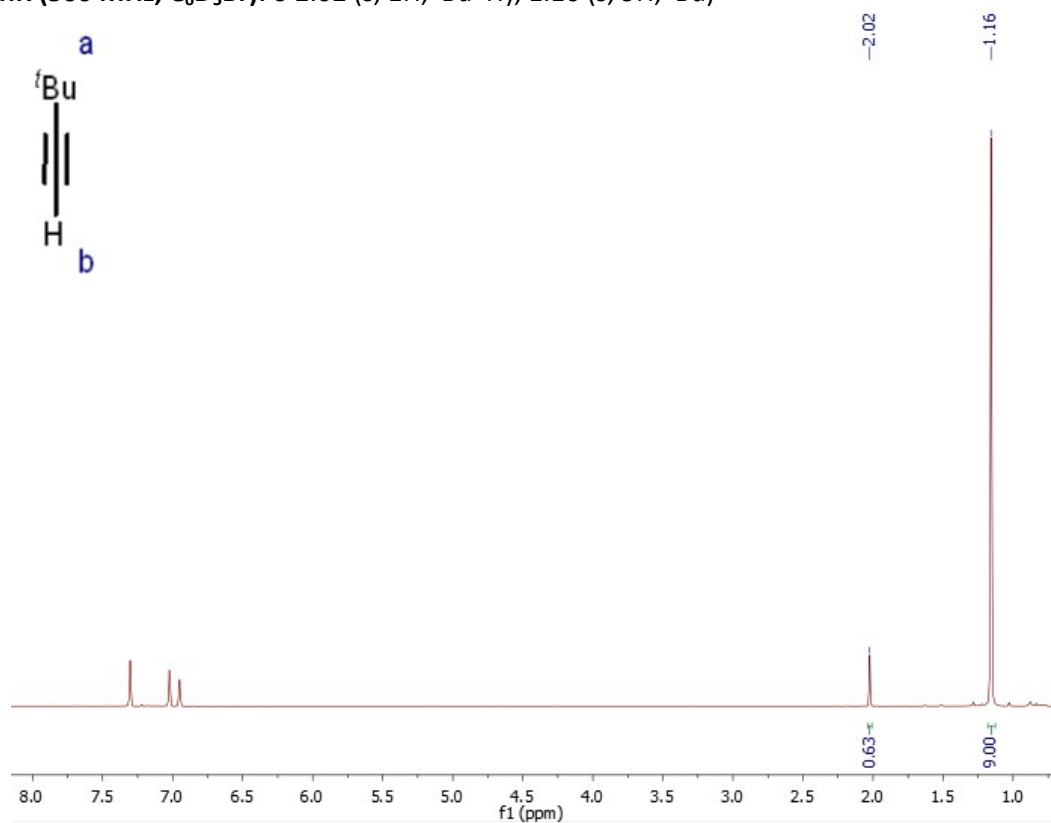

Figure S12: <sup>1</sup>H spectrum of *p*-tolylacetylene in C<sub>6</sub>D<sub>5</sub>Br.

**(Trimethylsilyl)acetylene (2h)**

**<sup>1</sup>H NMR (400 MHz, C<sub>6</sub>D<sub>5</sub>Br):** δ 2.30 (s, 1H, C-H), 0.14 (s, 9H, Si(CH<sub>3</sub>)<sub>3</sub>)

The other peaks in the spectrum belong to 1-azidoadamantane.

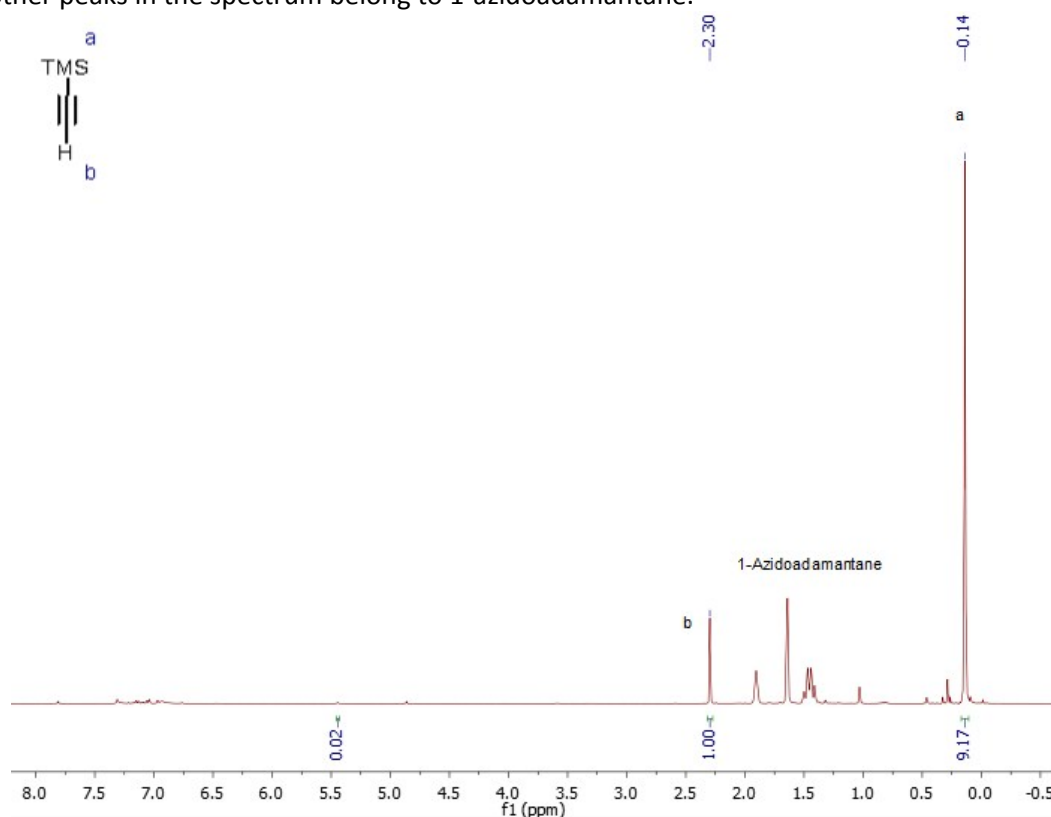

**Figure S13:** <sup>1</sup>H spectrum of (trimethylsilyl)acetylene in C<sub>6</sub>D<sub>5</sub>Br.

**1,7-octadiyne (2i)**

**<sup>1</sup>H NMR (500 MHz, C<sub>6</sub>D<sub>5</sub>Br):** δ 1.99 (s, 4H, HC≡C(CH<sub>2</sub>)(CH<sub>2</sub>)<sub>2</sub>(CH<sub>2</sub>)C≡CH), 1.88 (s, 2H, HC≡C(CH<sub>2</sub>)(CH<sub>2</sub>)<sub>2</sub>(CH<sub>2</sub>)C≡CH), 1.45 (s, 4H, HC≡C(CH<sub>2</sub>)(CH<sub>2</sub>)<sub>2</sub>(CH<sub>2</sub>)C≡CH)

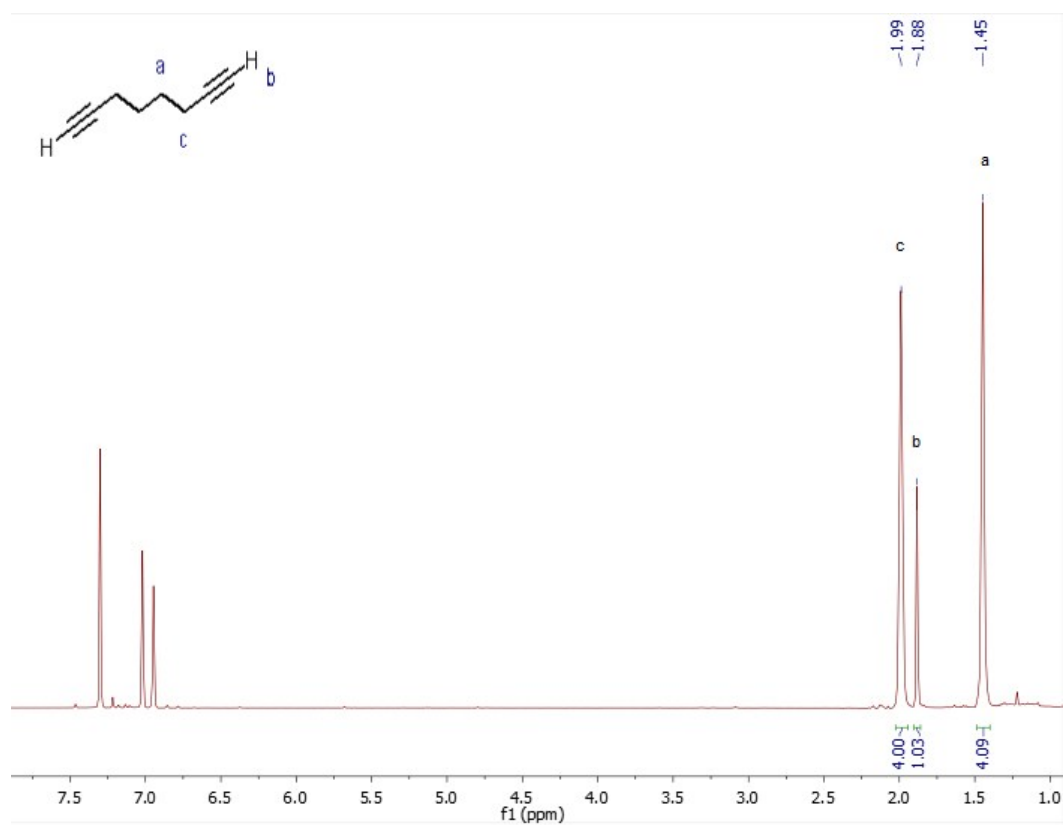

**Figure S14:**  $^1\text{H}$  spectrum of 1,7-octadiyne in  $\text{C}_6\text{D}_5\text{Br}$ .



### Characterization of uncatalyzed triazole products in C<sub>6</sub>D<sub>5</sub>Br

#### 1-(*p*-tolyl)-4,5-(diethyl)-1,2,3-triazole (6aa)

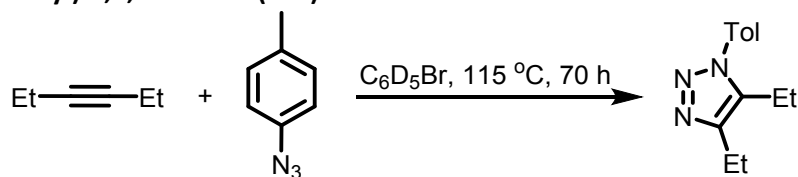

3-hexyne (16 mg, 0.1 mmol, 1.0 equiv.), (*p*-tolyl)azide (13 mg, 0.1 mmol, 1.0 equiv.) and 0.5 mL of C<sub>6</sub>D<sub>5</sub>Br were added to a NMR tube in a N<sub>2</sub>-filled glovebox. The tube was sealed and heated at 115 °C for 70 h. After which, the reaction mixture was analyzed by <sup>1</sup>H NMR without any further work-up to give a mixture of title compound, leftover starting reagents and side products originating from (*p*-tolyl)azide such as *p*-toluidine and 1,2-di-*p*-tolyl diazene

#### 1-(*p*-tolyl)-4,5-(diethyl)-1,2,3-triazole

<sup>1</sup>H NMR (500 MHz, C<sub>6</sub>D<sub>5</sub>Br): δ 7.14 (d, <sup>3</sup>J<sub>HH</sub> = 8.1 Hz, 2H, *o*-Tol-*H*), 7.01 (d, <sup>3</sup>J<sub>HH</sub> = 8.1 Hz, 2H, *m*-Tol-*H*), 2.65 (q, <sup>3</sup>J<sub>HH</sub> = 7.6 Hz, 2H, 4-CH<sub>2</sub>CH<sub>3</sub>), 2.44 (q, <sup>3</sup>J<sub>HH</sub> = 7.6 Hz, 2H, 5-CH<sub>2</sub>CH<sub>3</sub>), 2.16 (s, 3H, Tol-CH<sub>3</sub>), 1.35 (t, <sup>3</sup>J<sub>HH</sub> = 7.6 Hz, 3H, 4-CH<sub>2</sub>CH<sub>3</sub>), 0.85 (t, <sup>3</sup>J<sub>HH</sub> = 7.6 Hz, 3H, 5-CH<sub>2</sub>CH<sub>3</sub>)

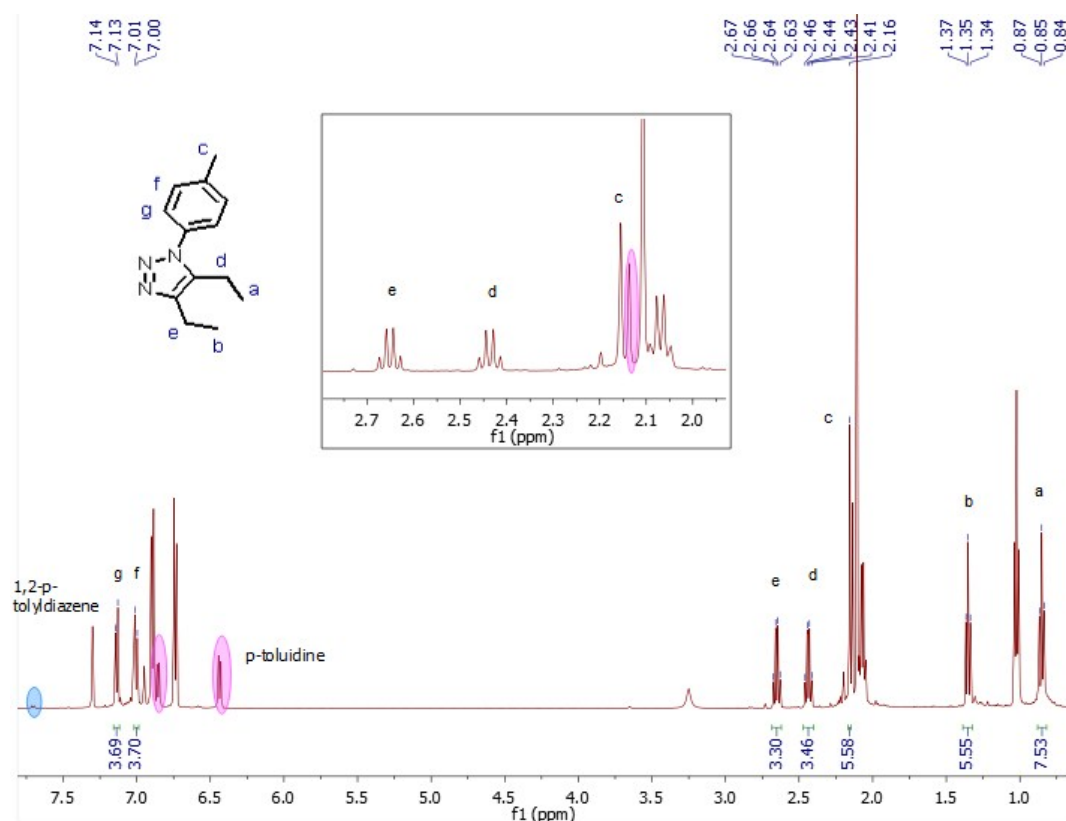

Figure S15: <sup>1</sup>H spectrum of 1-(*p*-tolyl)-4,5-(diethyl)-1,2,3-triazole in C<sub>6</sub>D<sub>5</sub>Br.

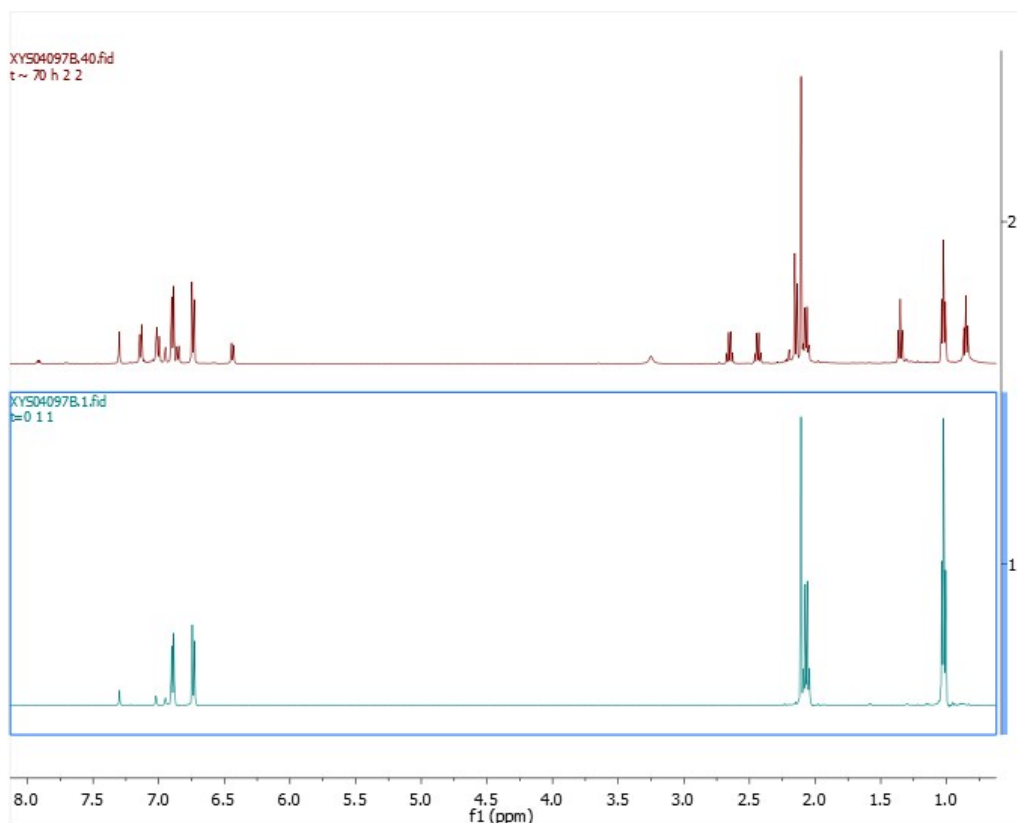

**Figure S16:** Before (bottom,  $t = 0$  h) and after (top,  $t = 70$  h)  $^1\text{H}$  spectrum of 3-hexyne and (*p*-tolyl)azido reaction in  $\text{C}_6\text{D}_5\text{Br}$ .

**1-adamantyl-4,5-di(ethyl)-1H-1,2,3-triazole (6ba) (partial)**

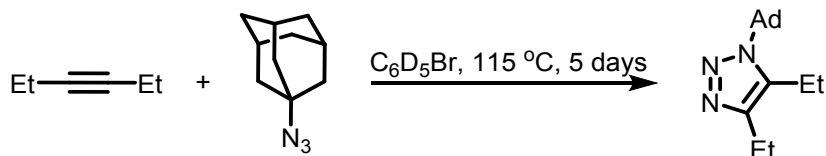

3-hexyne (45  $\mu\text{L}$ , 0.39 mmol, 2.1 equiv.), 1-Azidoadamantane (33 mg, 0.19 mmol, 1 equiv.) and 0.5 mL of  $\text{C}_6\text{D}_5\text{Br}$  were added to a NMR tube in a  $\text{N}_2$ -filled glovebox. The tube was sealed and heated at 115  $^\circ\text{C}$  for 5 days. After which, the reaction mixture was analyzed by  $^1\text{H}$  NMR without any further work-up to give the title compound and leftover starting reagents.

**1-adamantyl-4,5-di(ethyl)-1H-1,2,3-triazole**

$^1\text{H}$  NMR (500 MHz,  $\text{C}_6\text{D}_5\text{Br}$ ):  $\delta$  2.65 (q,  $^3J_{\text{HH}} = 7.5$  Hz, 2H, C(4)- $\text{CH}_2$ ), 2.55 (q,  $^3J_{\text{HH}} = 7.5$  Hz, 2H, C(5)- $\text{CH}_2$ ), 2.21 (d,  $^3J_{\text{HH}} = 3$  Hz, 6H, N-C-( $\text{CH}_2$ ) $_2$ ), 2.01 (s (br), 3H, Ad-methine), 1.58 (s (br), 6H, Ad), 1.32 (t,  $^3J_{\text{HH}} = 7.5$  Hz, 2H, C(4)- $\text{CH}_2$ - $\text{CH}_3$ ).

This is a partial line list; remaining methyl group hidden beneath 3-hexyne methyl group.

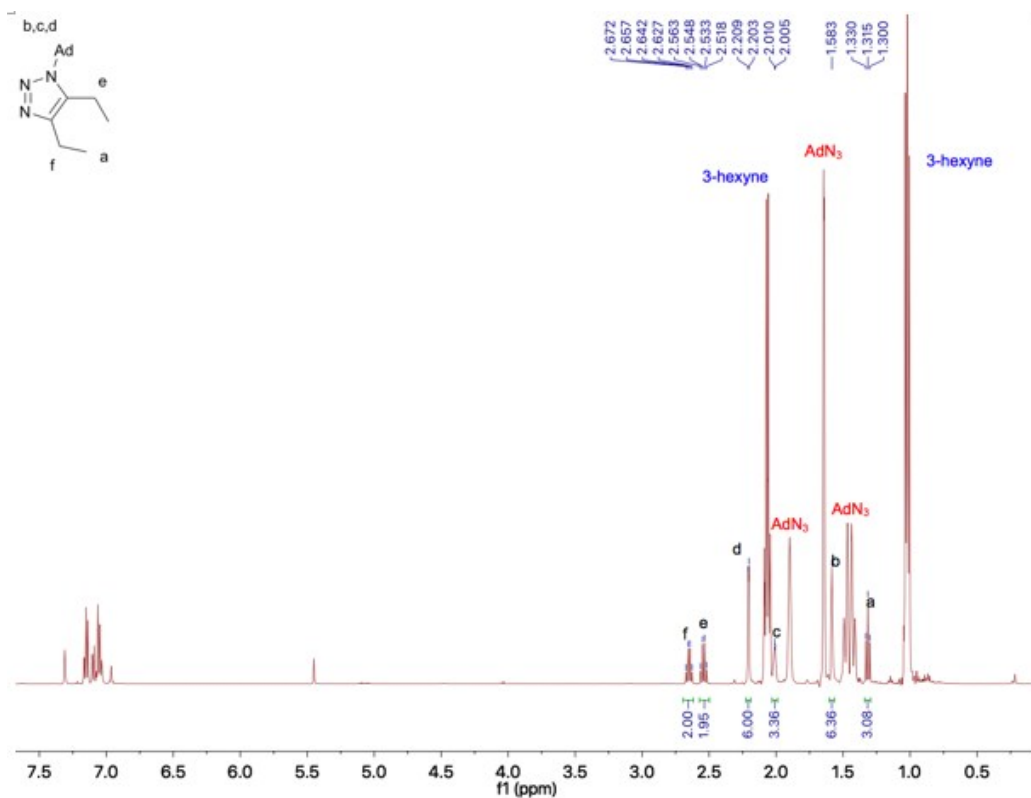

**Figure S17:**  $^1\text{H}$  NMR spectrum of 1-adamantyl-4,5-diethyl-1H-1,2,3-triazole in  $\text{C}_6\text{D}_5\text{Br}$ .

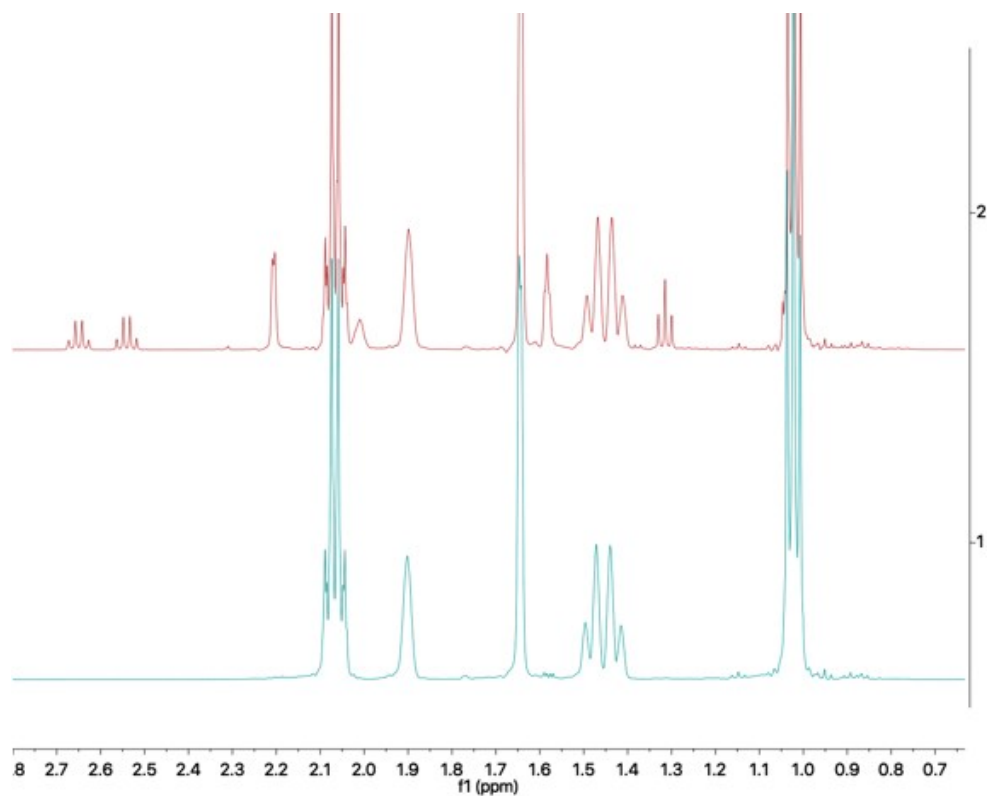

**Figure S18:** Before (bottom,  $t = 0$  hr) and after (top,  $t = 5$  days)  $^1\text{H}$  spectrum of 3-hexyne and 1-azidoadamantane reaction in  $\text{C}_6\text{D}_5\text{Br}$ .

**1-adamantyl-4,5-di(methyl)-1H-1,2,3-triazole (6bb) (partial)**

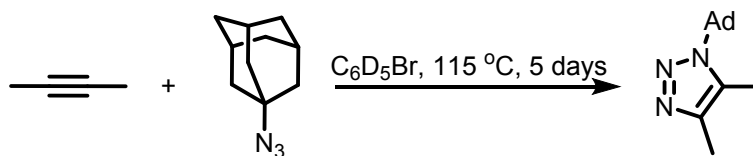

2-butyne (14 mg, 0.26 mmol, 1.7 equiv.), 1-azidoadamantane (27 mg, 0.15 mmol, 1.0 equiv.) and 0.5 mL of  $\text{C}_6\text{D}_5\text{Br}$  were added to a NMR tube in a  $\text{N}_2$ -filled glovebox. The tube was sealed and heated at  $115\text{ }^\circ\text{C}$  for 16 h. After which, the reaction mixture was analyzed by  $^1\text{H}$  NMR without any further work-up to give the title compound and leftover starting reagents.

**1-adamantyl-4,5-di(methyl)-1H-1,2,3-triazole**

$^1\text{H}$  NMR (400 MHz,  $\text{C}_6\text{D}_5\text{Br}$ ):  $\delta$  2.17 – 2.16 (m, 6H, Ad- $\text{CH}_2$ ), 2.15 (s, 3H, C4- $\text{CH}_3$ ), 2.09 (s, 3H, C5- $\text{CH}_3$ )

This is a partial NMR line list, the remaining adamantyl peaks are buried under the peaks for the starting reagents.

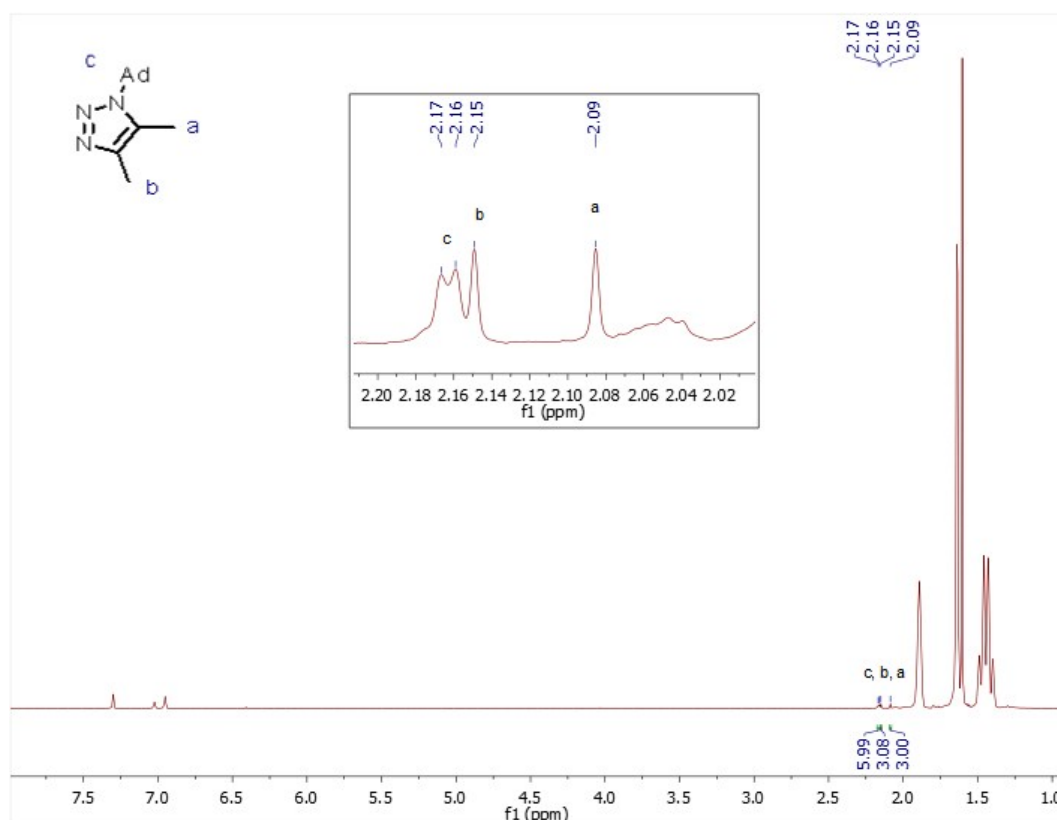

**Figure S19:**  $^1\text{H}$  spectrum of 1-adamantyl-4,5-di(methyl)-1H-1,2,3-triazole in  $\text{C}_6\text{D}_5\text{Br}$ .

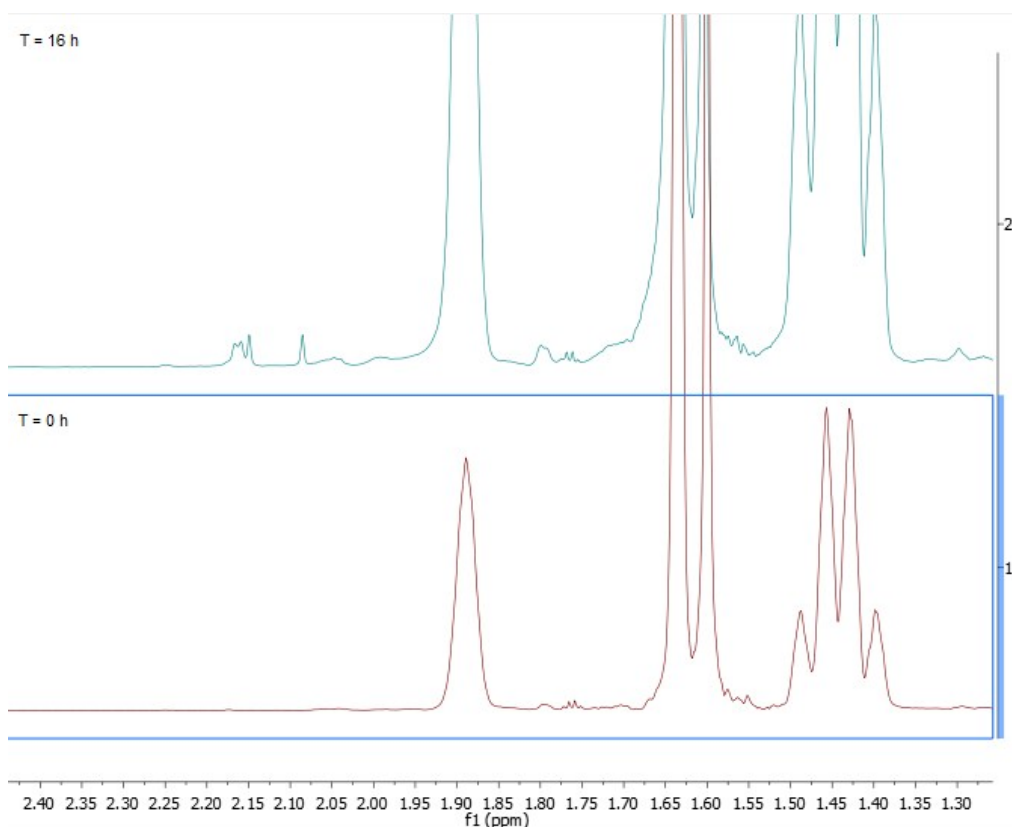

**Figure S20:** Before (bottom,  $t = 0$  h) and after (top,  $t = 16$  h)  $^1\text{H}$  spectrum of 2-butyne and 1-azidoadamantane reaction in  $\text{C}_6\text{D}_5\text{Br}$ .

**1-adamantyl-4,5-di(phenyl)-1H-1,2,3-triazole (6bc) (partial)**

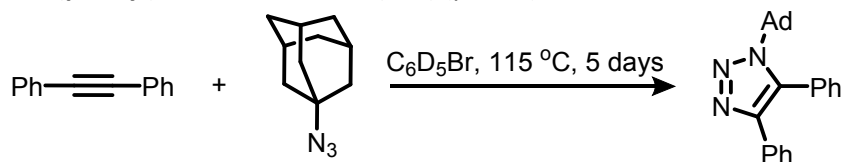

Diphenylacetylene (38 mg, 0.21 mmol, 1.1 equiv.), 1-azidoadamantane (33 mg, 0.19 mmol, 1 equiv.) and 0.5 mL of  $\text{C}_6\text{D}_5\text{Br}$  were added to a NMR tube in a  $\text{N}_2$ -filled glovebox. The tube was sealed and heated at  $115^\circ\text{C}$  for 5 days. After which, the reaction mixture was analyzed by  $^1\text{H}$  NMR without any further work-up to give the title compound and leftover starting reagents.

**1-adamantyl-4,5-di(phenyl)-1H-1,2,3-triazole**

$^1\text{H}$  NMR (500 MHz,  $\text{C}_6\text{D}_5\text{Br}$ ):  $\delta$  7.66 (d,  $^3J_{\text{HH}} = 7.0$  Hz, 2H, Ar-H) 7.23 (m, 3H, Ar-H), 2.18 (d,  $^3J_{\text{HH}} = 3$  Hz, 6H, N-C-( $\text{CH}_2$ )<sub>3</sub>)

This is a partial NMR line list, the remaining adamantyl and aryl peaks are buried under the peaks for the starting reagents.

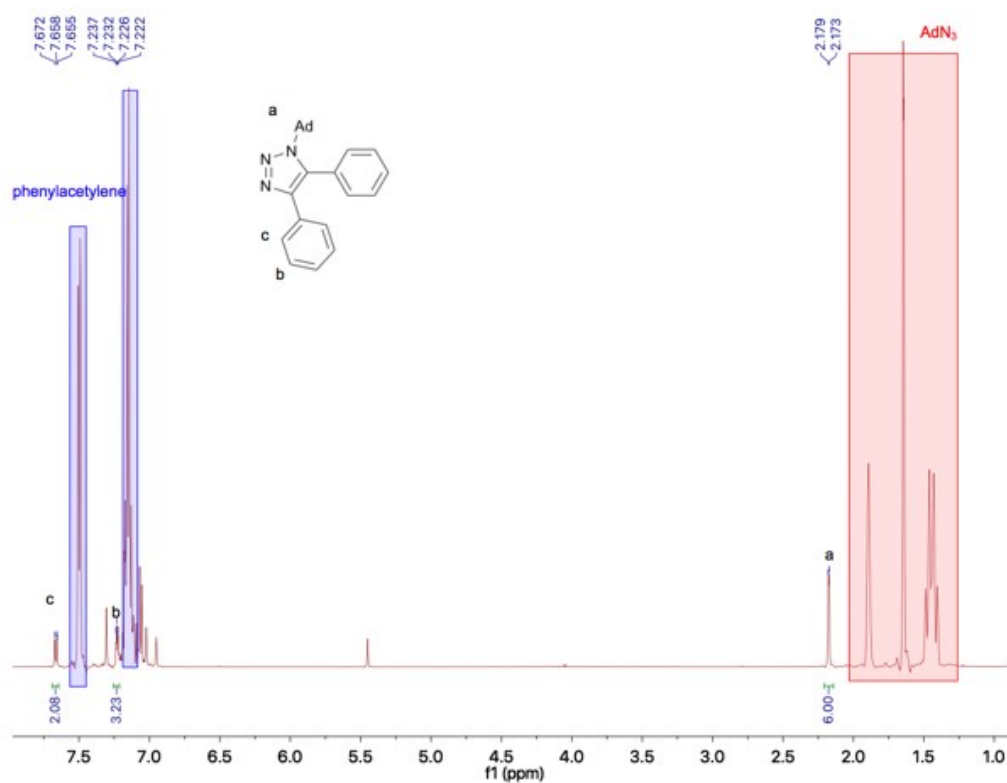

**Figure S21:**  $^1\text{H}$  spectrum of 1-adamantyl-4,5-diphenyl-1H-1,2,3-triazole in  $\text{C}_6\text{D}_5\text{Br}$ .

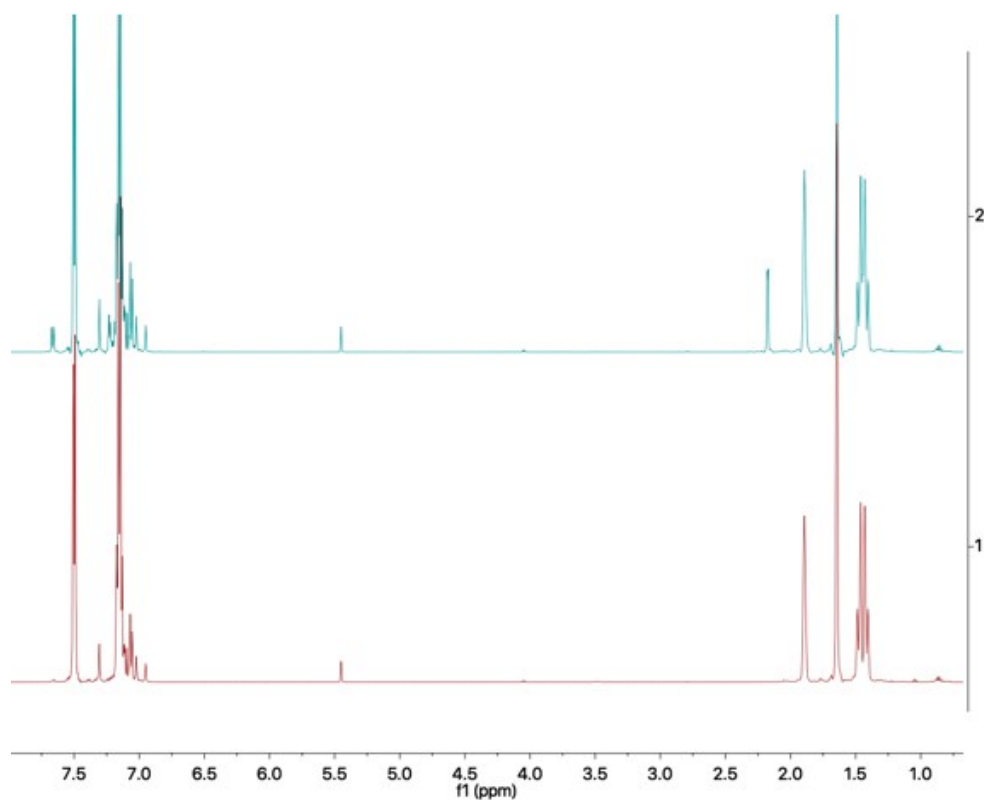

**Figure S22:** Before (bottom, t = 0 hr) and after (top, t = 5 days)  $^1\text{H}$  spectrum of diphenylacetylene and 1-azidoadamantane reaction in  $\text{C}_6\text{D}_5\text{Br}$ .

**1-adamantyl-4-methyl-5-phenyl-1H-1,2,3-triazole and 1-adamantyl-5-methyl-4-phenyl-1H-1,2,3-triazole (6bd)**

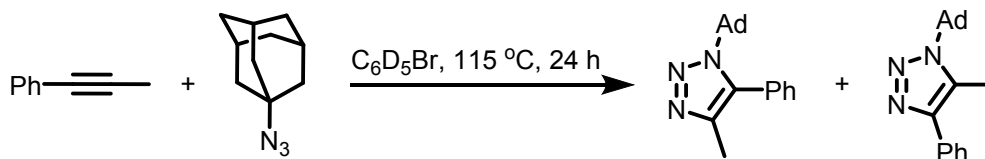

1-Phenyl-1-propyne (75  $\mu$ L, 0.59 mmol, 2.6 equiv.), 1-azidoadamantane (40 mg, 0.11 mmol, 1.0 equiv.) and 0.5 mL of  $C_6D_5Br$  were added to a NMR tube in a  $N_2$ -filled glovebox. The tube was sealed and heated at 115  $^{\circ}C$  for 24 h. After which, the reaction mixture was analyzed by  $^1H$  NMR without any further work-up to give a mixture of both title compounds and leftover starting reagents.

**1-adamantyl-4-methyl-5-phenyl-1H-1,2,3-triazole**

$^1H$  NMR (500 MHz,  $C_6D_5Br$ ):  $\delta$  7.73 (d,  $^3J_{HH} = 6.5$ , 2H, *o*-Ar-H), 7.35 (t,  $^3J_{HH} = 7.5$ , 2H, *m*-Ar-H), 2.35 (s, 3H, C(4)- $CH_3$ ), 2.22 (d,  $^3J_{HH} = 3.0$  Hz, 6H, N-C-( $CH_2$ ) $_3$ ), 2.02 (s (br), 3H, Ad-methine), 1.59 (s (br), 6H, Ad). This is a partial NMR line list; *p*-aryl C-H is hidden behind the peaks for starting materials

**1-adamantyl-5-methyl-4-phenyl-1H-1,2,3-triazole**

$^1H$  NMR (500 MHz,  $C_6D_5Br$ ):  $\delta$  7.23 (t,  $^3J_{HH} = 7.0$  Hz, 2H, *m*-Ar-H), 2.15 (d,  $^3J_{HH} = 3.0$  Hz, 6H, N-C-( $CH_2$ ) $_3$ ), 2.07 (s, 3H, C(5)- $CH_3$ )

This is a partial NMR line list; Remaining peaks are hidden behind starting materials.

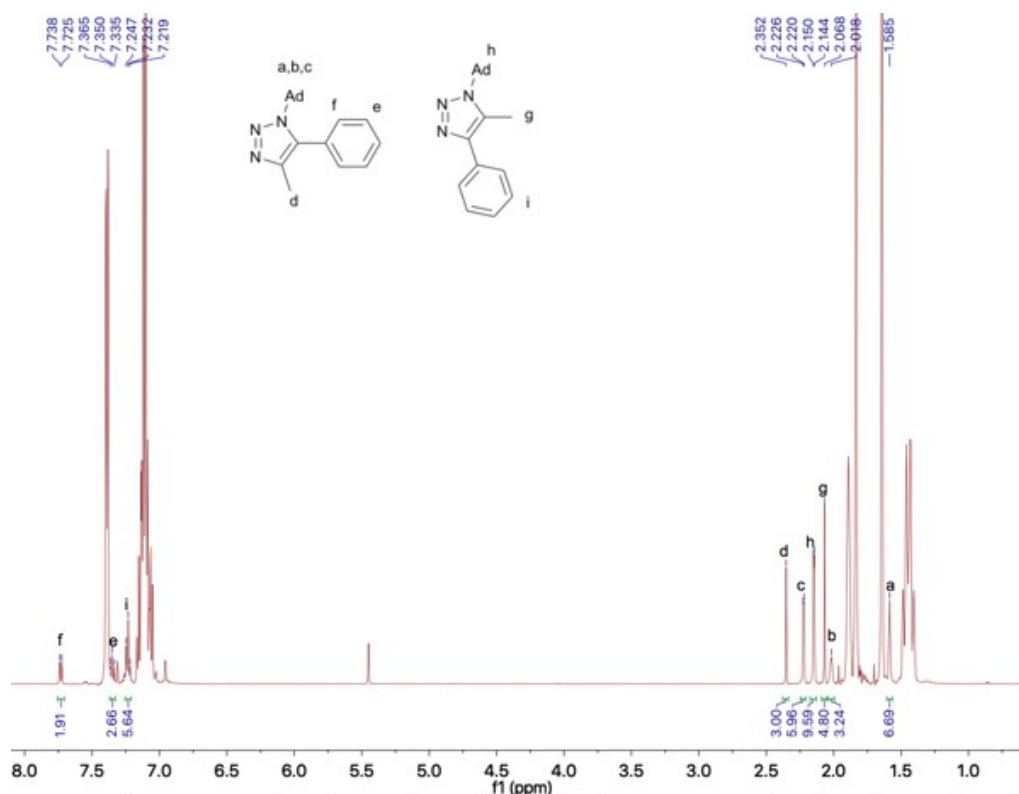

**Figure S23:**  $^1H$  spectrum of 1-adamantyl-4-methyl-5-phenyl-1H-1,2,3-triazole and 1-adamantyl-5-methyl-4-phenyl-1H-1,2,3-triazole in  $C_6D_5Br$ .

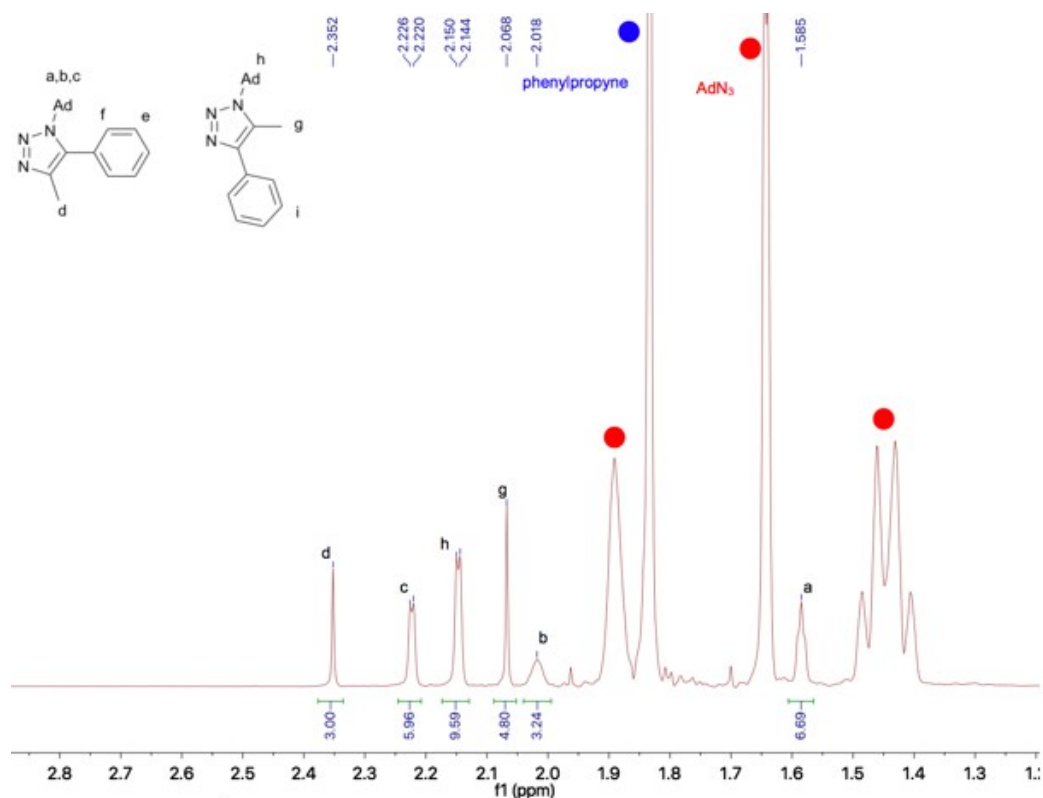

**Figure S24:** Zoom-in  $^1\text{H}$  spectrum of the alkyl region of 1-adamantyl-4-methyl-5-phenyl-1H-1,2,3-triazole and 1-adamantyl-5-methyl-4-phenyl-1H-1,2,3-triazole in  $\text{C}_6\text{D}_5\text{Br}$ .

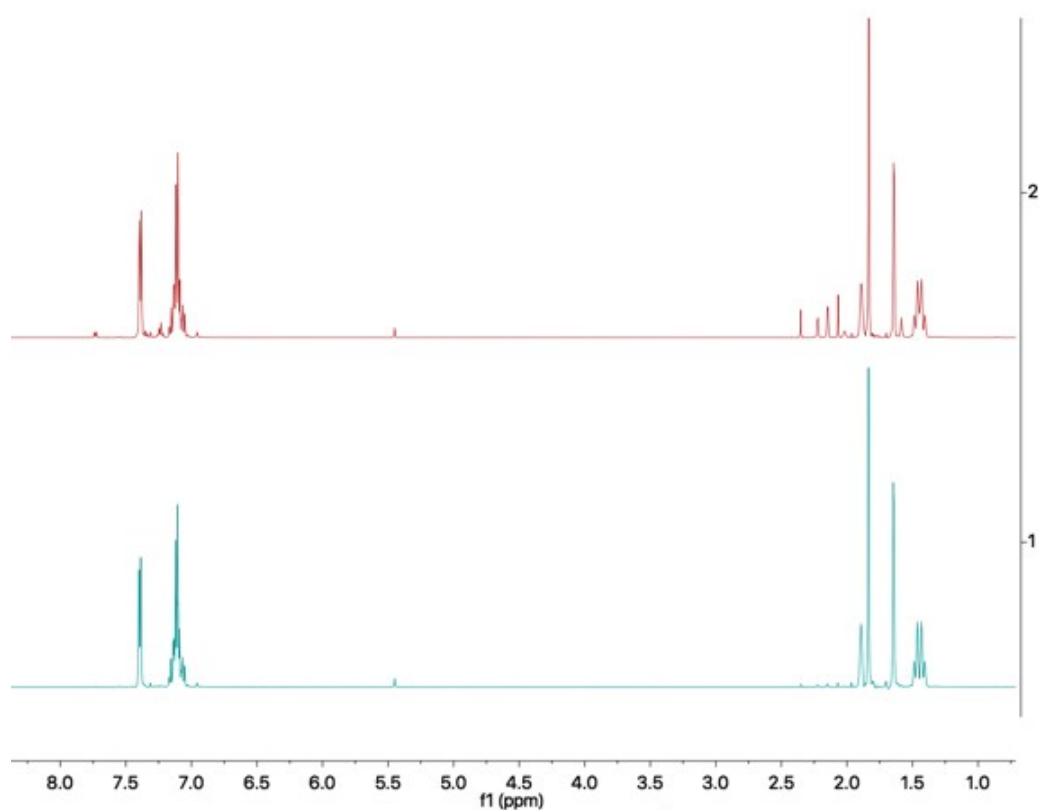

**Figure S25:** Before (bottom,  $t = 0$  hr) and after (top,  $t = 24$  h)  $^1\text{H}$  spectrum of 1-phenyl-1-propyne and 1-azidoadamantane reaction in  $\text{C}_6\text{D}_5\text{Br}$ .



**1-adamantyl-4-(*n*-butyl)-1H-1,2,3-triazole and 1-adamantyl-5-(*n*-butyl)-1H-1,2,3-triazole (6be)**  
(partial)

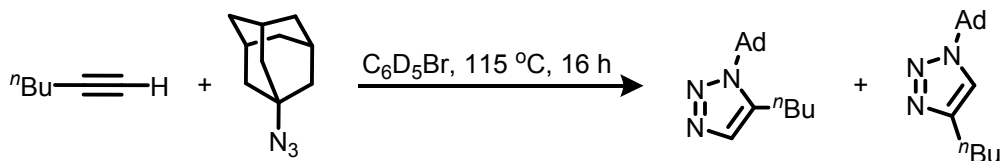

1-hexyne (15 mg, 0.18 mmol, 1.6 equiv.), 1-azidoadamantane (20 mg, 0.11 mmol, 1.0 equiv.) and 0.5 mL of  $C_6D_5Br$  were added to a NMR tube in a  $N_2$ -filled glovebox. The tube was sealed and heated at 115 °C for 16 h. After which, the reaction mixture was analyzed by  $^1H$  NMR without any further work-up to give a mixture of both title compounds and leftover starting reagents.

**1-adamantyl-4-(*n*-butyl)-1H-1,2,3-triazole (partial)**

$^1H$  NMR (400 MHz,  $C_6D_5Br$ ):  $\delta$  7.12 (s, 1H, Ar-CH), 2.71 (t,  $^3J_{HH} = 7.8$  Hz, 2H,  $CH_2CH_2CH_2CH_3$ ), 2.04 (m, 6H, Ad- $CH_2$ ), 1.98 (m, 3H, Ad-CH), 1.56 (m, 6H, Ad- $CH_2$ ), 0.88 (t,  $^3J_{HH} = 7.4$  Hz, 3H,  $CH_2CH_2CH_2CH_3$ )  
Singlet at  $\delta$  2.04 is partially overlapped by the 1-hexyne substrate. This is a partial NMR line list, the remaining peaks for the *n*-butyl chain are overlapping with other peaks.

**1-adamantyl-5-(*n*-butyl)-1H-1,2,3-triazole (partial)**

$^1H$  NMR (400 MHz,  $C_6D_5Br$ ):  $\delta$  7.44 (s, 1H, Ar-CH), 2.64 (t,  $^3J_{HH} = 7.8$  Hz, 2H,  $CH_2CH_2CH_2CH_3$ ), 2.22 – 2.21 (m, 6H, Ad- $CH_2$ )

Triplet peak for  $CH_2CH_2CH_2CH_3$  is buried under the other regioisomer at  $\delta$  0.86. This is a partial NMR line list, the remaining peaks for the adamantyl group and *n*-butyl chain are overlapping with other peaks.

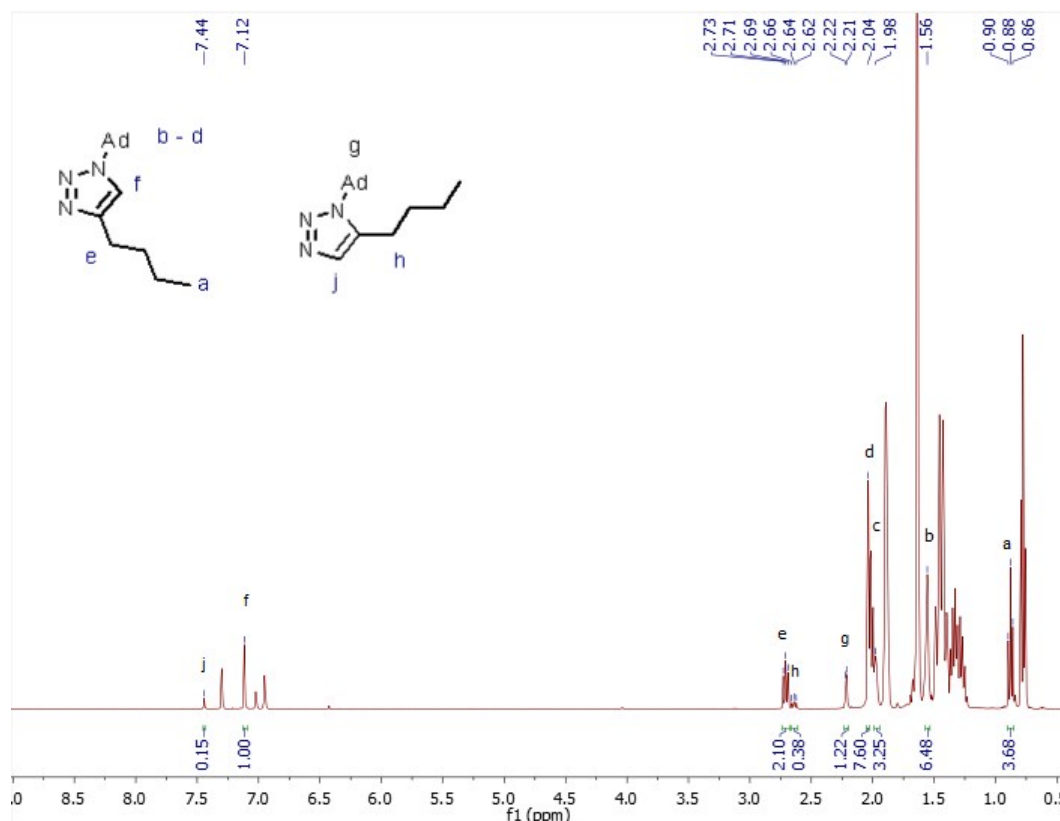

**Figure S26:**  $^1H$  spectrum of 1-adamantyl-4-(*n*-butyl)-1H-1,2,3-triazole and 1-adamantyl-5-(*n*-butyl)-1H-1,2,3-triazole in  $C_6D_5Br$ .

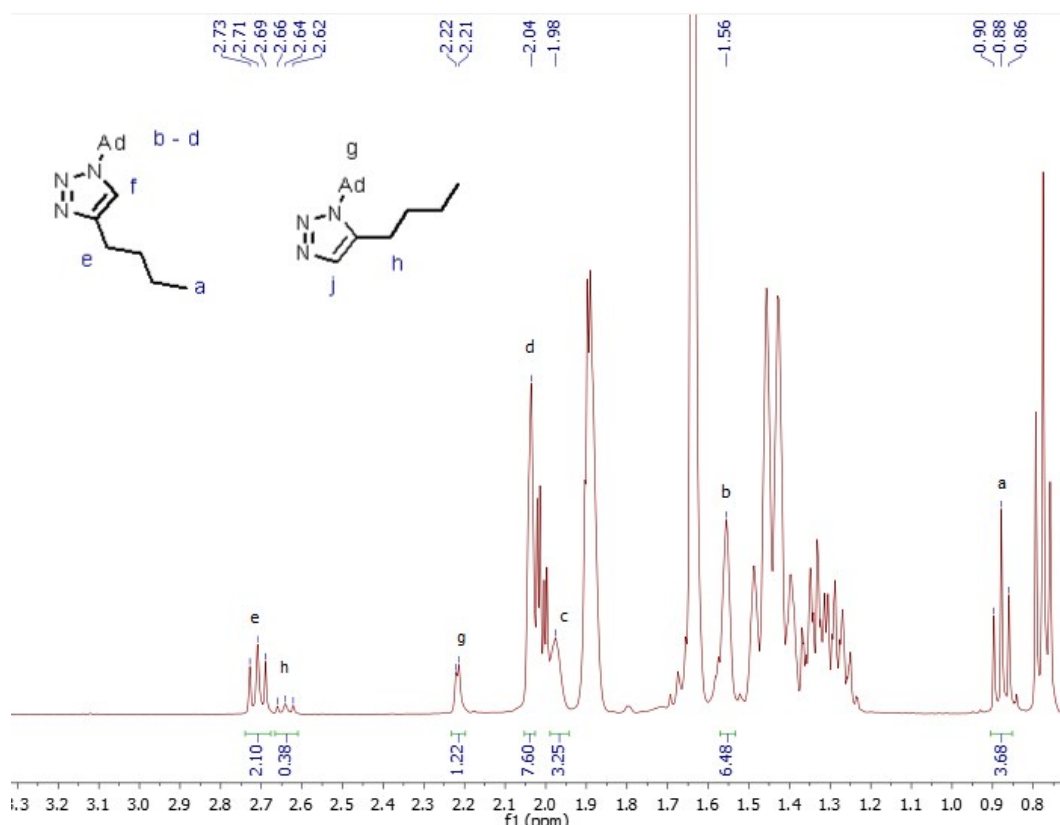

**Figure S27:** Zoom-in  $^1\text{H}$  spectrum of 1-adamantyl-4-(*n*-butyl)-1H-1,2,3-triazole and 1-adamantyl-(5-*n*-butyl)-1H-1,2,3-triazole in  $\text{C}_6\text{D}_5\text{Br}$ .

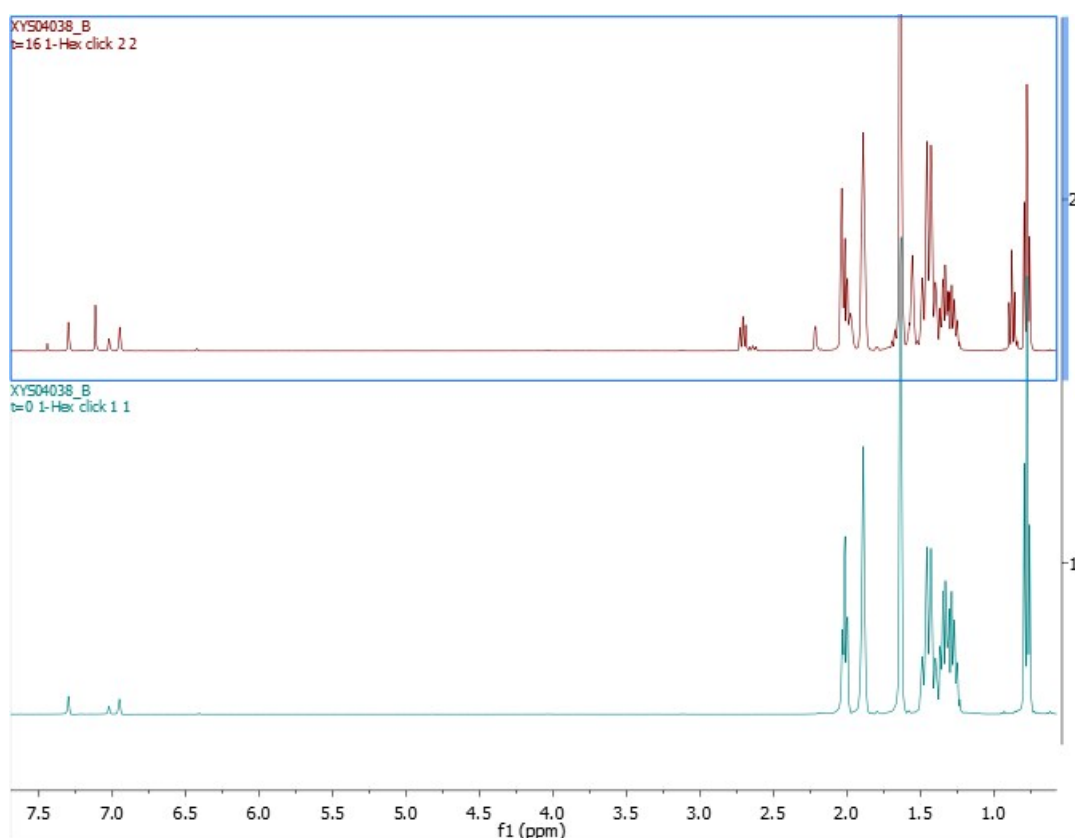

**Figure S28:** Before (bottom,  $t = 0$  h) and after (top,  $t = 16$  h)  $^1\text{H}$  spectrum of 1-hexyne and 1-azidoadamantane reaction in  $\text{C}_6\text{D}_5\text{Br}$ .

**1-adamantyl-4-(*p*-tolyl)-1H-1,2,3-triazole and 1-adamantyl-5-(*p*-tolyl)-1H-1,2,3-triazole (6bf)**  
(partial)

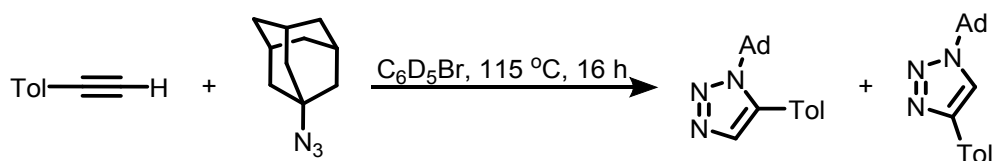

(*p*-tolyl)acetylene (15 mg, 0.13 mmol, 1.4 equiv.), 1-azidoadamantane (16 mg, 0.09 mmol, 1.0 equiv.) and 0.5 mL of  $C_6D_5Br$  were added to a NMR tube in a  $N_2$ -filled glovebox. The tube was sealed and heated at 115 °C for 16 h. After which, the reaction mixture was analyzed by  $^1H$  NMR without any further work-up to give a mixture of title compounds and leftover starting reagents.

**1-adamantyl-4-(*p*-tolyl)-1H-1,2,3-triazole**

$^1H$  NMR (400 MHz,  $C_6D_5Br$ ):  $\delta$  7.88 (d,  $^3J_{HH} = 8.1$  Hz, 2H, *o*-Tol-*H*), 7.87 (s, 1H, Ar-*H*), 7.13 (d,  $^3J_{HH} = 7.9$  Hz, 2H, *m*-Tol-*H*), 2.23 (s, 3H, Tol- $CH_3$ ), 2.07 – 2.06 (m, 6H, Ad- $CH_2$ ), 2.00 (br s, 3H, Ad-CH), 1.57 (m, 6H, Ad- $CH_2$ )

**1-adamantyl-5-(*p*-tolyl)-1H-1,2,3-triazole (partial)**

$^1H$  NMR (400 MHz,  $C_6D_5Br$ ):  $\delta$  7.53 (s, 1H, Ar-*H*), 7.10 (d,  $^3J_{HH} = 8.0$  Hz, 2H, *o*-Tol-*H*), 7.02 (d,  $^3J_{HH} = 7.7$  Hz, 2H, *m*-Tol-*H*), 2.17 (m, 9H, Tol- $CH_3$  and Ad- $CH_2$ )

*m*-Tol-*H* peak at  $\delta$  7.02 ppm overlaps with  $C_6D_5Br$  solvent peak. This is a partial NMR line list, the remaining peaks for the adamantyl group are overlapping with other peaks.

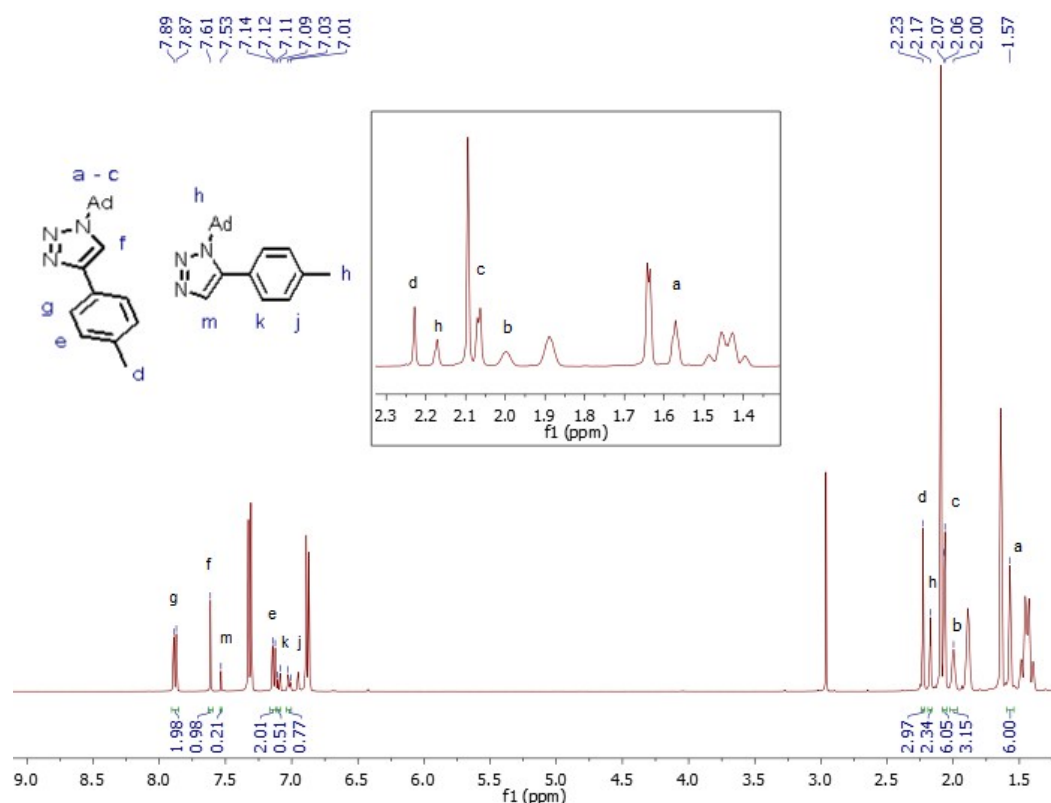

**Figure S29:**  $^1H$  spectrum of 1-adamantyl-4-(*p*-tolyl)-1H-1,2,3-triazole and 1-adamantyl-5-(*p*-tolyl)-1H-1,2,3-triazole in  $C_6D_5Br$ .

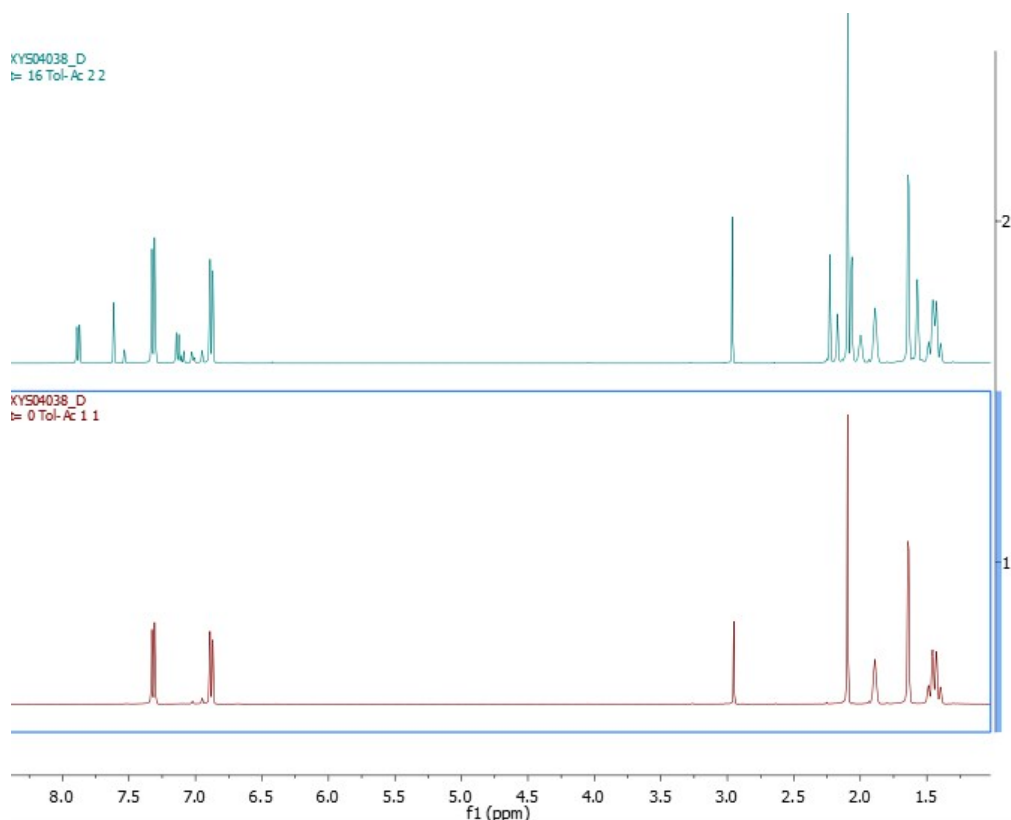

**Figure S30:** Before (bottom,  $t = 0$  h) and after (top,  $t = 16$  h)  $^1\text{H}$  spectrum of (*p*-tolyl)acetylene and 1-azidoadamantane reaction in  $\text{C}_6\text{D}_5\text{Br}$ .

**1-(*p*-tolyl)-4-(*t*-butyl)-1H-1,2,3-triazole and 1-(*p*-tolyl)-5-(*t*-butyl)-1H-1,2,3-triazole (6ag) (partial)**

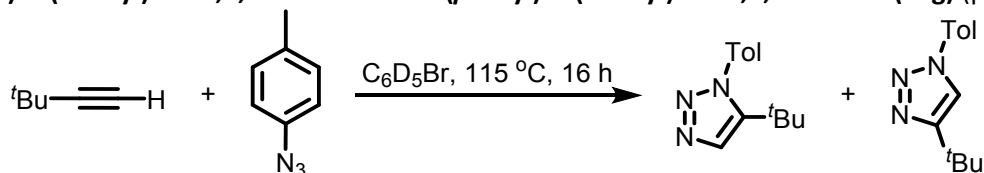

(*t*-butyl)acetylene (15 mg, 0.18 mmol, 1.1 equiv.), (*p*-tolyl)azide (21 mg, 0.16 mmol, 1.0 equiv.) and 0.5 mL of  $\text{C}_6\text{D}_5\text{Br}$  were added to a NMR tube in a  $\text{N}_2$ -filled glovebox. The tube was sealed and heated at 115 °C for 16 h. After which, the reaction mixture was analyzed by  $^1\text{H}$  NMR without any further work-up to give a mixture of title compounds, leftover starting reagents and side products originating from (*p*-tolyl)azido such as *p*-toluidine and 1,2-di-*p*-tolyl diazene

**1-(*p*-tolyl)-4-(*t*-butyl)-1H-1,2,3-triazole**

$^1\text{H}$  NMR (400 MHz,  $\text{C}_6\text{D}_5\text{Br}$ ):  $\delta$  7.46 (s, 1H, Ar-*H*), 7.44 (d,  $^3J_{\text{HH}} = 8.4$  Hz, 2H, *o*-Tol-*H*), 7.00 (d,  $^3J_{\text{HH}} = 8.1$  Hz, 2H, *m*-Tol-*H*), 2.15 (s, 3H, Tol- $\text{CH}_3$ ), 1.40 (s, 9H, *t*Bu)

**1-(*p*-tolyl)-5-(*t*-butyl)-1H-1,2,3-triazole (partial)**

$^1\text{H}$  NMR (400 MHz,  $\text{C}_6\text{D}_5\text{Br}$ ):  $\delta$  7.50 (s, 1H, Ar-*H*), 1.03 (s, 9H, *t*Bu)

This is a partial NMR line list, the remaining peaks cannot be positively identified from the other degradation impurities.

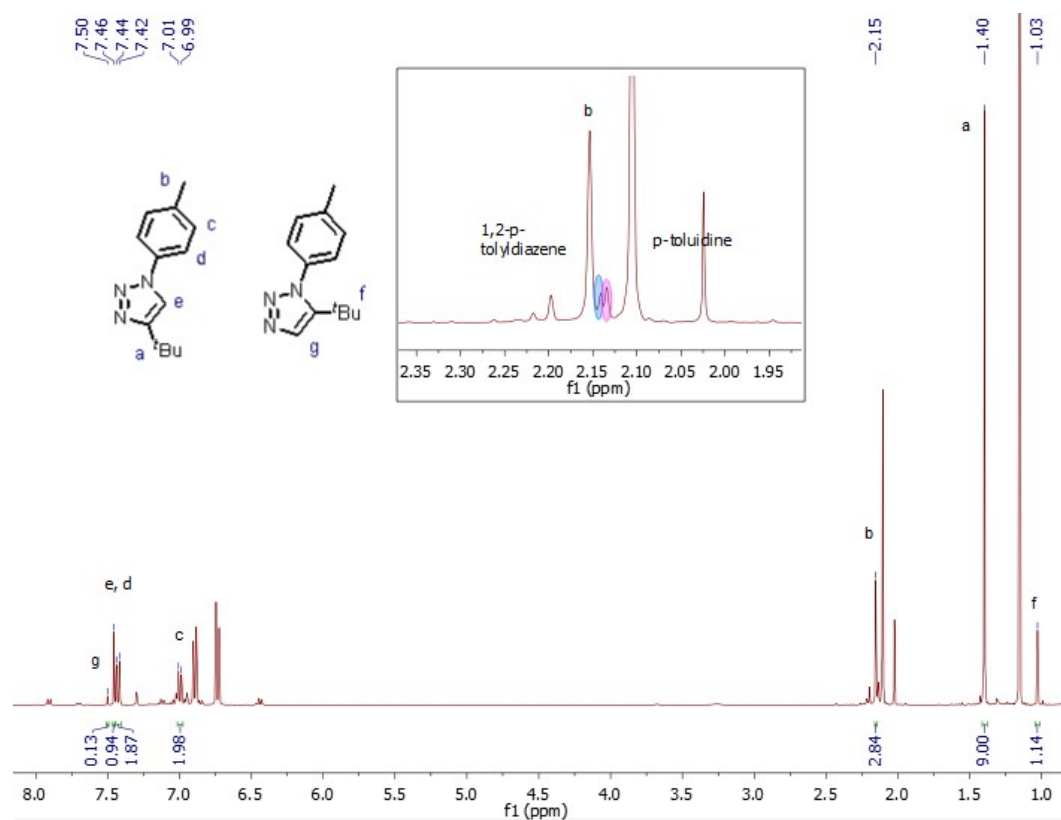

**Figure S31:**  $^1\text{H}$  spectrum of 1-(*p*-tolyl)-4-(*t*-butyl)-1H-1,2,3-triazole and 1-(*p*-tolyl)-5-(*t*-butyl)-1H-1,2,3-triazole in  $\text{C}_6\text{D}_5\text{Br}$ .

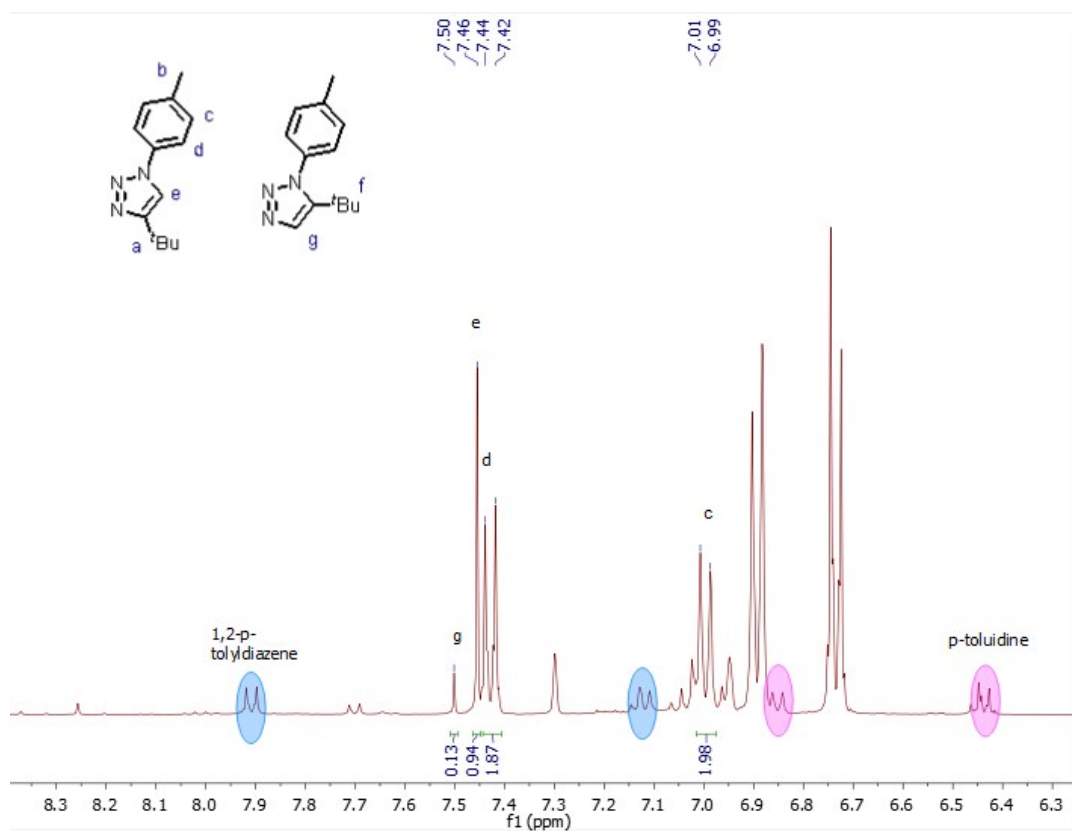

**Figure S32:** Zoom-in  $^1\text{H}$  spectrum of 1-(*p*-tolyl)-4-(*t*-butyl)-1H-1,2,3-triazole and 1-(*p*-tolyl)-5-(*t*-butyl)-1H-1,2,3-triazole in  $\text{C}_6\text{D}_5\text{Br}$ .

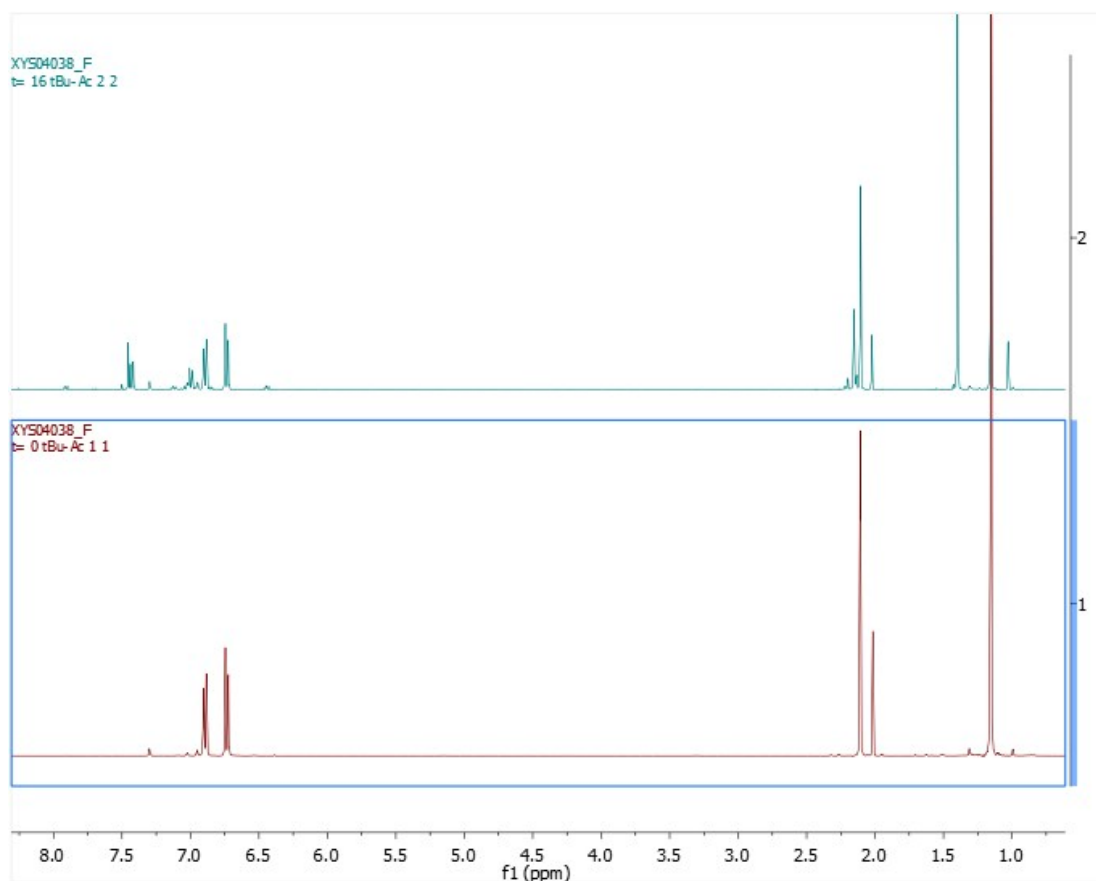

**Figure S33:** Before (bottom,  $t = 0$  h) and after (top,  $t = 16$  h)  $^1\text{H}$  spectrum of (t-butyl)acetylene and (p-tolyl)azido reaction in  $\text{C}_6\text{D}_5\text{Br}$ .

#### 1-adamantyl-4-(trimethylsilyl)-1H-1,2,3-triazole (6bh)

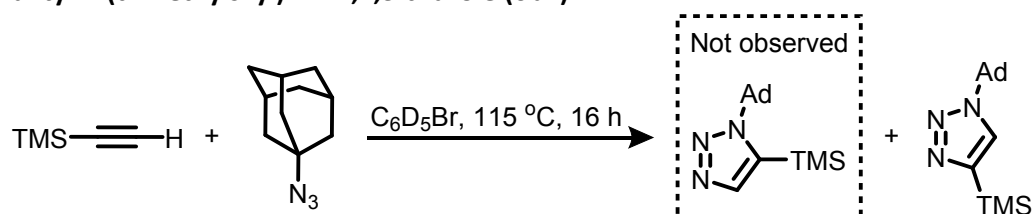

(Trimethylsilyl)acetylene (16 mg, 0.16 mmol, 1.7 equiv.), 1-azidoadamantane (16 mg, 0.09 mmol, 1.0 equiv.) and 0.5 mL of  $\text{C}_6\text{D}_5\text{Br}$  were added to a NMR tube in a  $\text{N}_2$ -filled glovebox. The tube was sealed and heated at  $115^\circ\text{C}$  for 16 h. After which, the reaction mixture was analyzed by  $^1\text{H}$  NMR without any further work-up to give a mixture of title compound and leftover starting reagents.

#### 1-adamantyl-4-(trimethylsilyl)-1H-1,2,3-triazole

$^1\text{H}$  NMR (400 MHz,  $\text{C}_6\text{D}_5\text{Br}$ ):  $\delta$  7.56 (s, 1H, Ar-H), 2.03 (m, 6H, Ad- $\text{CH}_2$ ), 1.96 (br s, 3H, Ad-CH), 1.54 (br s, 6H, Ad- $\text{CH}_2$ ), 0.38 (s, 9H,  $\text{Si}(\text{CH}_3)_3$ )

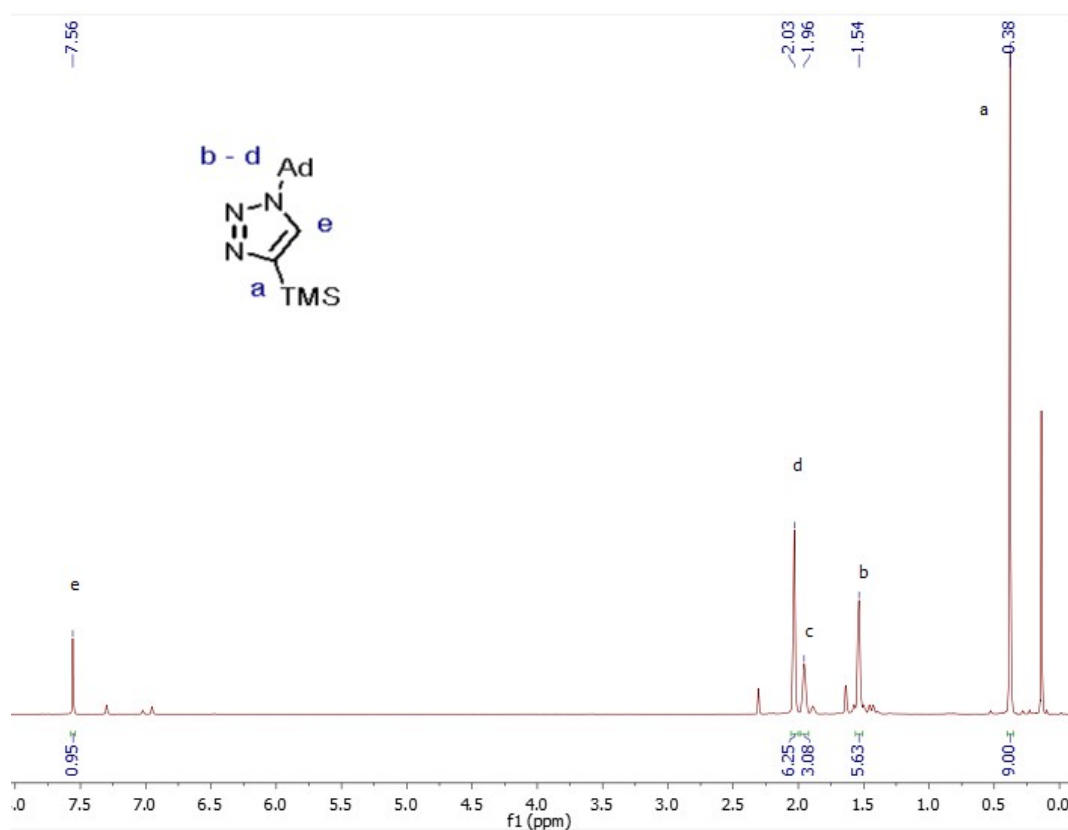

**Figure S34:** <sup>1</sup>H spectrum of 1-adamantyl-4-(trimethylsilyl)-1H-1,2,3-triazole in C<sub>6</sub>D<sub>5</sub>Br.

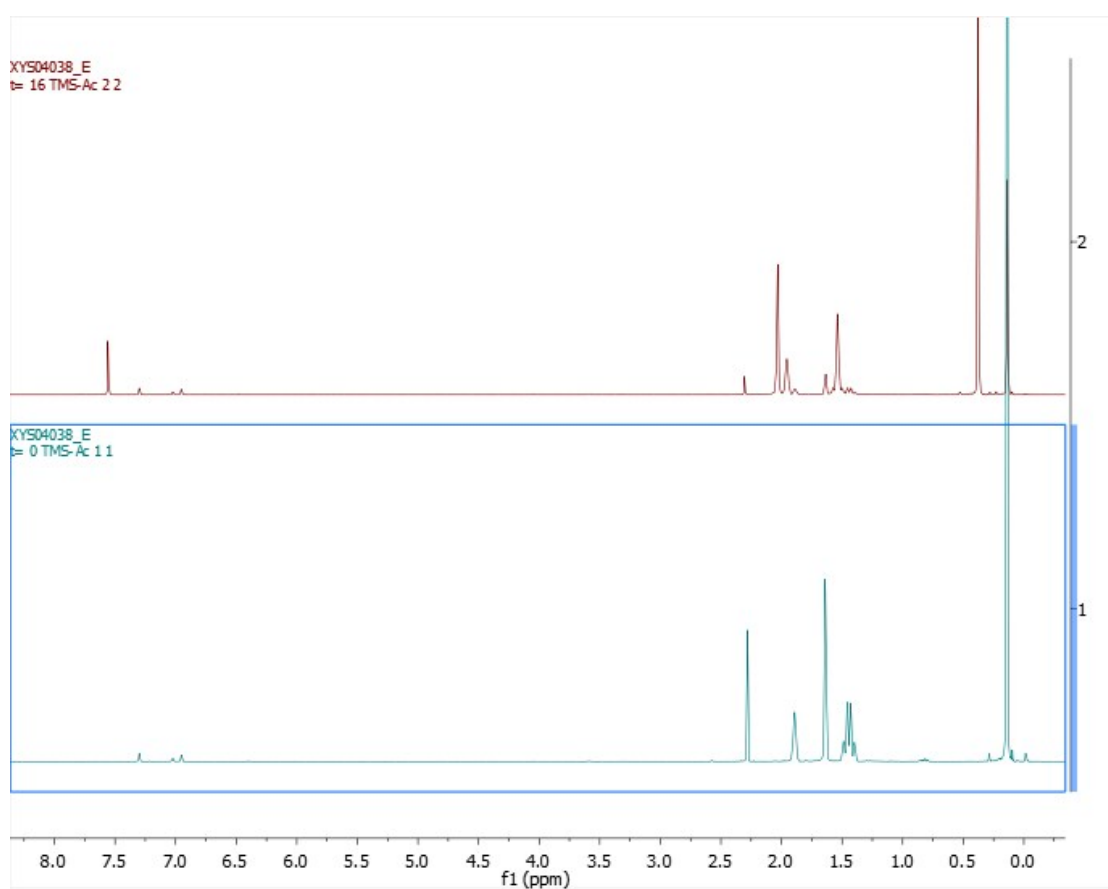

**Figure S35:** Before (bottom,  $t = 0$  h) and after (top,  $t = 16$  h) <sup>1</sup>H spectrum of (trimethylsilyl)acetylene and 1-azidoadamantane reaction in C<sub>6</sub>D<sub>5</sub>Br.

### 1-adamantyl-4-(5-hexyn-1-yl)-1H-1,2,3-triazole (6bi)

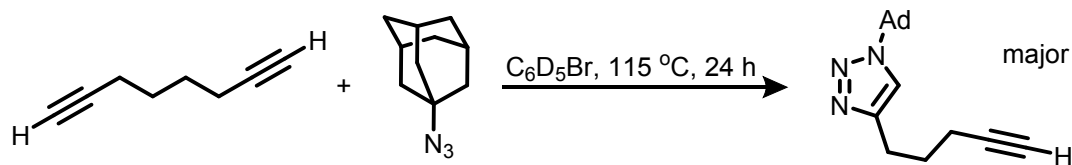

1,7-octadiyne (11 mg, 0.10 mmol, 0.43 equiv.), 1-Azidoadamantane (40. mg, 0.23 mmol, 1 equiv.) and 0.5 mL of  $C_6D_5Br$  were added to a NMR tube in a  $N_2$ -filled glovebox. The tube was sealed and heated at  $115\text{ }^{\circ}C$  for 24 h. After which, the reaction mixture was analyzed by  $^1H$  NMR without any further work-up to give a mixture of title compound and leftover starting reagents.

### 1-adamantyl-4-(5-hexyn-1-yl)-1H-1,2,3-triazole

$^1H$  NMR (500 MHz,  $C_6D_5Br$ ):  $\delta$  7.10 (s, 1H, Ar-H), 2.67 (t,  $^3J_{HH} = 8.0$  Hz, 2H, Ar- $CH_2$ ), 2.07 (td,  $^3J_{HH} = 7.0$  Hz,  $^4J_{HH} = 2.5$  Hz, 2H,  $HC\equiv C-CH_2$ ) 2.02 (d,  $^3J_{HH} = 7.5$  Hz, 6H, N-C( $CH_2$ )<sub>2</sub> of adamantyl group), 1.56 (m, 6H, Ad).

This is a partial NMR line list, the remaining peaks for the hexynyl chain and adamantyl group are overlapping with other peaks.

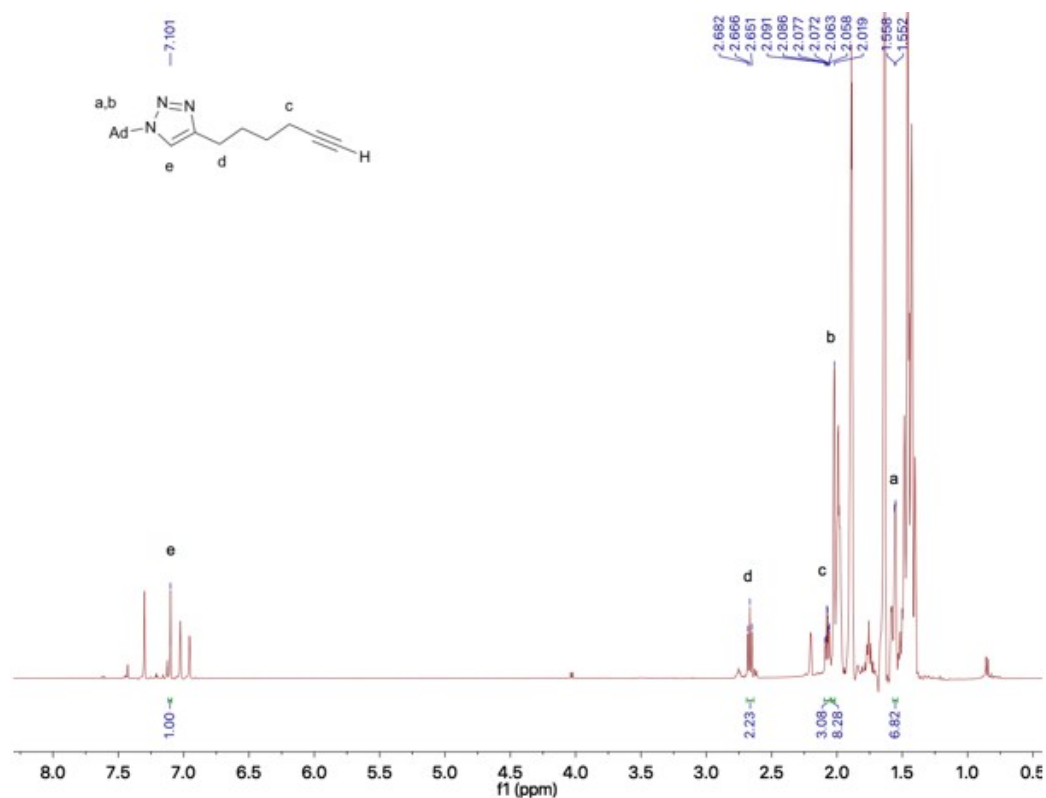

Figure S36:  $^1H$  spectrum of 1-adamantyl-4-(5-hexyn-1-yl)-1H-1,2,3-triazole in  $C_6D_5Br$ .



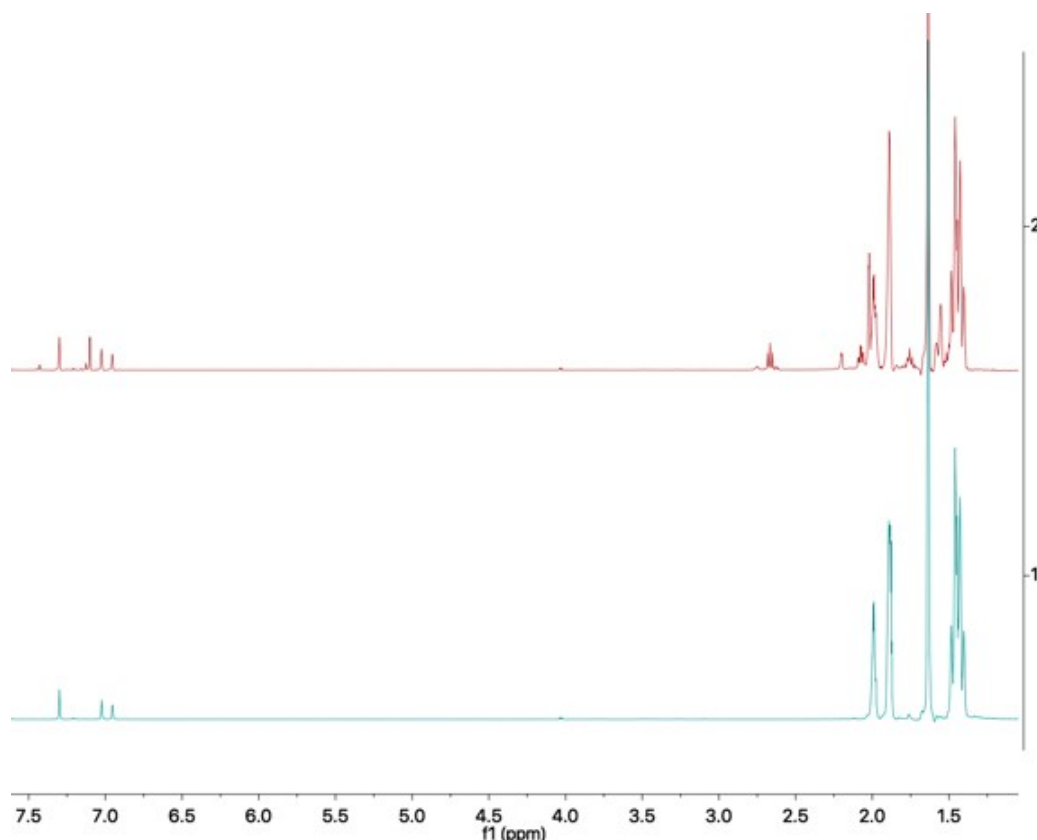

**Figure S37:** Before (bottom,  $t = 0$  h) and after (top,  $t = 24$  h)  $^1\text{H}$  spectrum of 1,7-octadiyne and 1-azidoadamantane reaction in  $\text{C}_6\text{D}_5\text{Br}$ .

**1-(*n*-decyl)-4,5-(diethyl)-1,2,3-triazole (6ca) (partial)**

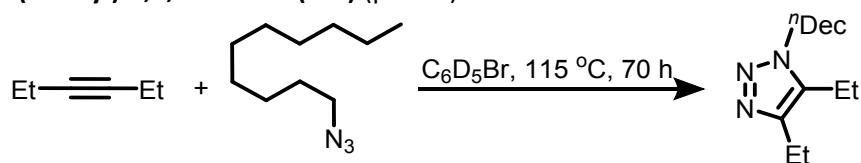

3-hexyne (16 mg, 0.1 mmol, 1.0 equiv.), 1-azidodecane (19 mg, 0.1 mmol, 1.0 equiv.) and 0.5 mL of  $\text{C}_6\text{D}_5\text{Br}$  were added to a NMR tube in a  $\text{N}_2$ -filled glovebox. The tube was sealed and heated at 115 °C for 70 h. After which, the reaction mixture was analyzed by  $^1\text{H}$  NMR without any further work-up to give a mixture of title compound and leftover starting reagents.

**1-(*n*-decyl)-4,5-(diethyl)-1,2,3-triazole**

**$^1\text{H}$  NMR (500 MHz,  $\text{C}_6\text{D}_5\text{Br}$ ):**  $\delta$  3.92 (t,  $^3J_{\text{HH}} = 7.3$  Hz, 2H,  $\text{H}_3\text{C}(\text{CH}_2)_8\text{-CH}_2\text{-N}$ ), 2.57 (q,  $^3J_{\text{HH}} = 7.6$  Hz, 2H, 4- $\text{CH}_2\text{CH}_3$ ), 2.35 (q,  $^3J_{\text{HH}} = 7.6$  Hz, 2H, 5- $\text{CH}_2\text{CH}_3$ ), 1.71 – 1.68 (m, 2H,  $\text{H}_3\text{C}(\text{CH}_2)_7\text{-CH}_2\text{-CH}_2\text{N}$ ), 0.95 (t,  $^3J_{\text{HH}} = 7.6$  Hz, 3H, 5- $\text{CH}_2\text{CH}_3$ )

This is a partial NMR line list, the remaining peaks are buried under the starting reagents.

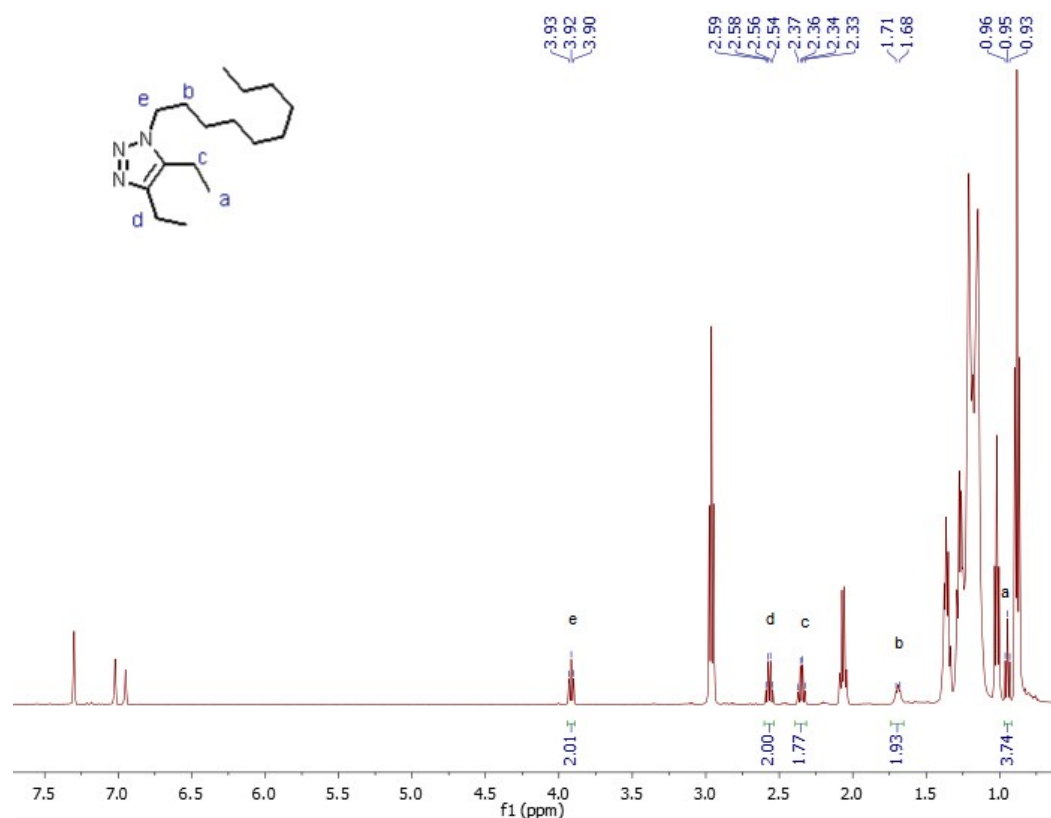

**Figure S38:**  $^1\text{H}$  spectrum of 1-(*n*-decyl)-4,5-(diethyl)-1,2,3-triazole in  $\text{C}_6\text{D}_5\text{Br}$ .

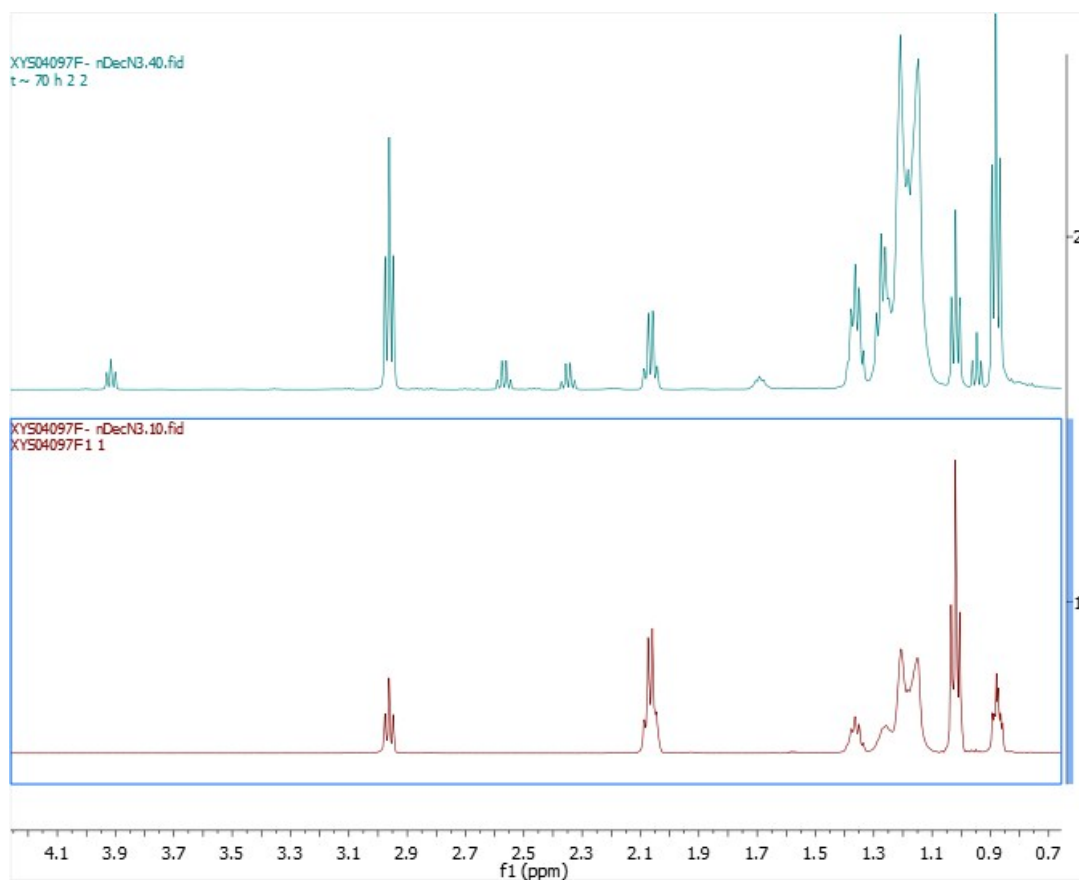

**Figure S39:** Before (bottom,  $t = 0$  h) and after (top,  $t = 70$  h) zoom-in  $^1\text{H}$  spectrum of 3-hexyne and 1-azidodecane reaction in  $\text{C}_6\text{D}_5\text{Br}$ .

**1-(benzyl)-4,5-(diethyl)-1,2,3-triazole (6da) (partial)**

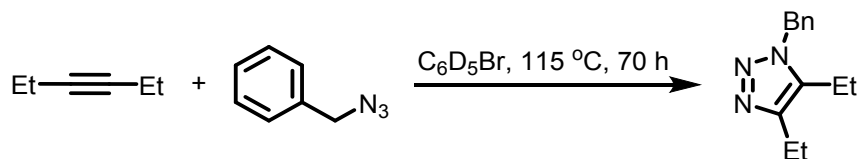

3-hexyne (16 mg, 0.1 mmol, 1.0 equiv.), benzylazide (14 mg, 0.1 mmol, 1.0 equiv.) and 0.5 mL of C<sub>6</sub>D<sub>5</sub>Br were added to a NMR tube in a N<sub>2</sub>-filled glovebox. The tube was sealed and heated at 115 °C for 70 h. After which, the reaction mixture was analyzed by <sup>1</sup>H NMR without any further work-up to give a mixture of title compound and leftover starting reagents.

**1-(benzyl)-4,5-(diethyl)-1,2,3-triazole**

<sup>1</sup>H NMR (500 MHz, C<sub>6</sub>D<sub>5</sub>Br): δ 6.98 – 6.97 (m, 2H, Ar-H), 5.17 (s, 2H, Ar-CH<sub>2</sub>), 2.54 (q, <sup>3</sup>J<sub>HH</sub> = 7.6 Hz, 2H, 4-CH<sub>2</sub>CH<sub>3</sub>), 2.23 (q, <sup>3</sup>J<sub>HH</sub> = 7.6 Hz, 2H, 5-CH<sub>2</sub>CH<sub>3</sub>), 1.26 (t, <sup>3</sup>J<sub>HH</sub> = 7.6 Hz, 3H, 4-CH<sub>2</sub>CH<sub>3</sub>), 0.71 (t, <sup>3</sup>J<sub>HH</sub> = 7.6 Hz, 3H, 5-CH<sub>2</sub>CH<sub>3</sub>).

This is a partial NMR line list, the remaining aryl peaks are buried under the starting reagents.

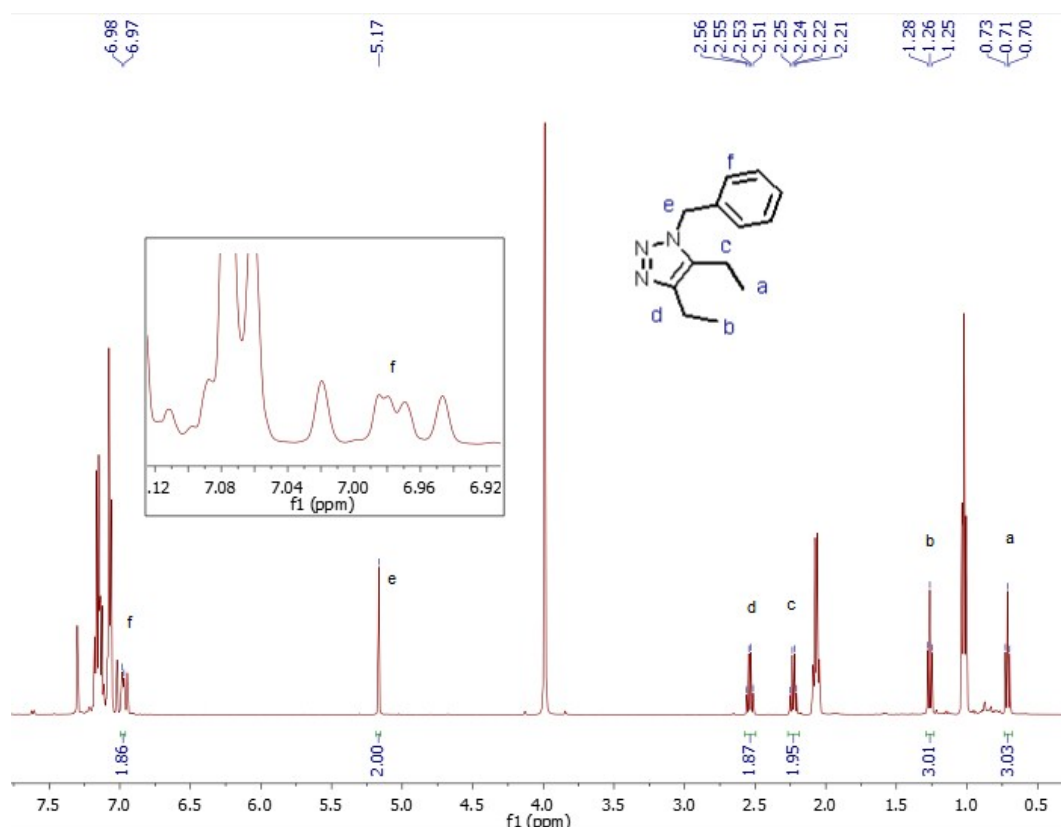

**Figure S40:** <sup>1</sup>H spectrum of 1-(benzyl)-4,5-(diethyl)-1,2,3-triazole in C<sub>6</sub>D<sub>5</sub>Br.

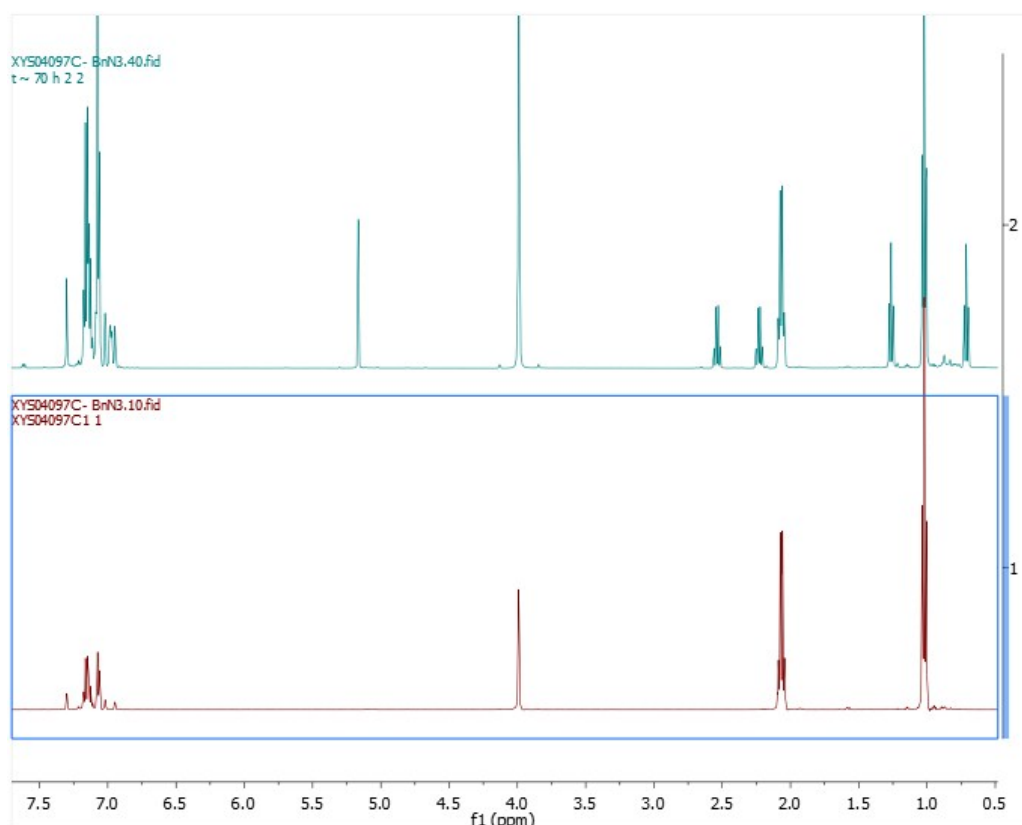

**Figure S41:** Before (bottom,  $t = 0$  h) and after (top,  $t = 70$  h)  $^1\text{H}$  spectrum of 3-hexyne and benzylazide reaction in  $\text{C}_6\text{D}_5\text{Br}$ .

**1-(methyl phenyl sulfide)-4,5-(diethyl)-1,2,3-triazole (6ea) (partial)**

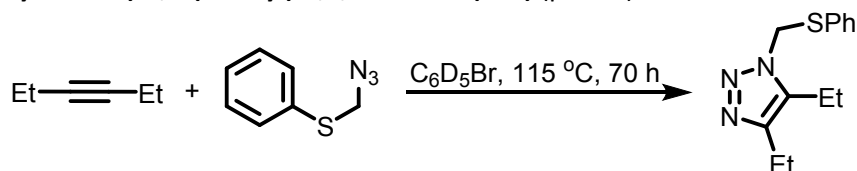

3-hexyne (16 mg, 0.1 mmol, 1.0 equiv.), azidomethyl phenyl sulfide (18 mg, 0.1 mmol, 1.0 equiv.) and 0.5 mL of  $\text{C}_6\text{D}_5\text{Br}$  were added to a NMR tube in a  $\text{N}_2$ -filled glovebox. The tube was sealed and heated at  $115^\circ\text{C}$  for 70 h. After which, the reaction mixture was analyzed by  $^1\text{H}$  NMR without any further work-up to give a mixture of title compound and leftover starting reagents.

**1-(methyl phenyl sulfide)-4,5-(diethyl)-1,2,3-triazole**

$^1\text{H}$  NMR (500 MHz,  $\text{C}_6\text{D}_5\text{Br}$ ):  $\delta$  5.28 (s, 2H,  $\text{PhS-CH}_2$ ), 2.49 (q,  $^3J_{\text{HH}} = 7.6$  Hz, 2H, 4- $\text{CH}_2\text{CH}_3$ ), 2.33 (q,  $^3J_{\text{HH}} = 7.6$  Hz, 2H, 5- $\text{CH}_2\text{CH}_3$ ), 1.21 (t,  $^3J_{\text{HH}} = 7.6$  Hz, 3H, 4- $\text{CH}_2\text{CH}_3$ ), 0.93 (t,  $^3J_{\text{HH}} = 7.6$  Hz, 3H, 5- $\text{CH}_2\text{CH}_3$ )

This is a partial NMR line list, the decomposition peaks are overlapping with the aryl peaks.

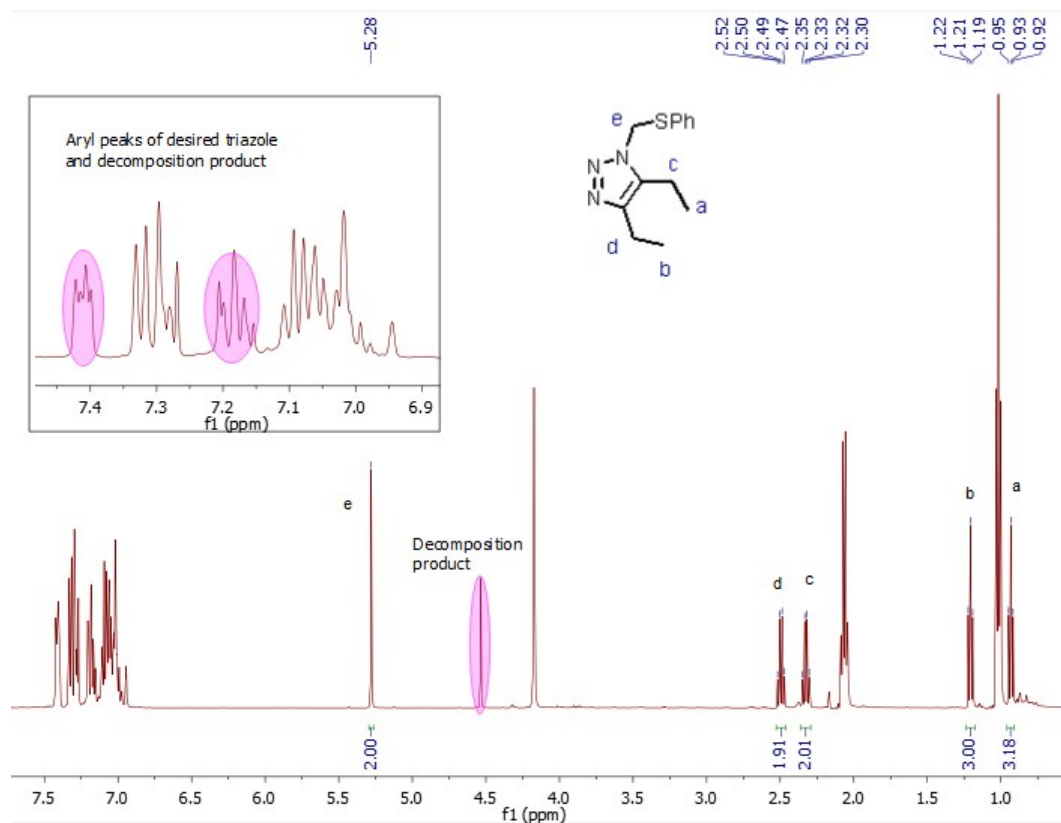

**Figure S42:**  $^1\text{H}$  spectrum of 1-(methyl phenyl sulfide)-4,5-(diethyl)-1,2,3-triazole in  $\text{C}_6\text{D}_5\text{Br}$ .

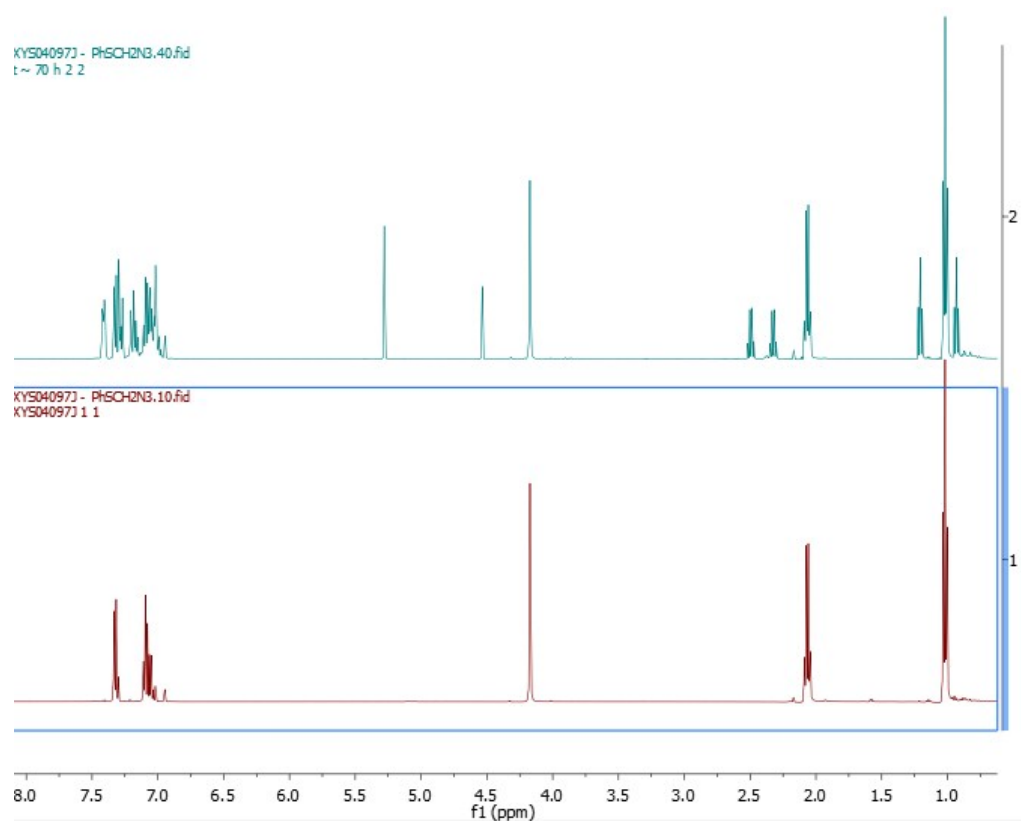

**Figure S43:** Before (bottom,  $t = 0$  h) and after (top,  $t = 70$  h)  $^1\text{H}$  spectrum of 3-hexyne and azidomethyl phenyl sulfide reaction in  $\text{C}_6\text{D}_5\text{Br}$ .

**Attempted reaction of trityl azide and 3-hexyne (6fa) in C<sub>6</sub>D<sub>5</sub>Br**

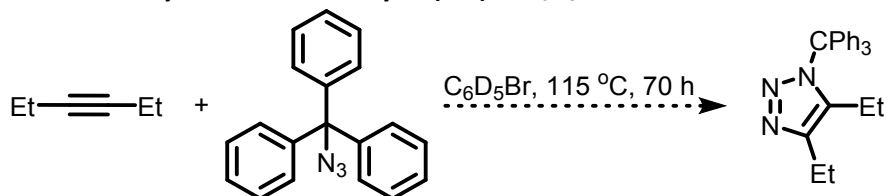

3-hexyne (16 mg, 0.1 mmol, 1.0 equiv.), trityl azide (28 mg, 0.1 mmol, 1.0 equiv.) and 0.5 mL of  $\text{C}_6\text{D}_5\text{Br}$  were added to a NMR tube in a  $\text{N}_2$ -filled glovebox. The tube was sealed and heated at  $115\text{ }^\circ\text{C}$  for 70 h. After which, the reaction mixture was analyzed by  $^1\text{H}$  NMR without any further work-up to give leftover starting reagents, degradation products and a small new quartet peak that we cannot positively attribute as the desired product.

In light of the slow/no reactivity, we do not think that this by-product formation will be significant in our catalytic reaction.

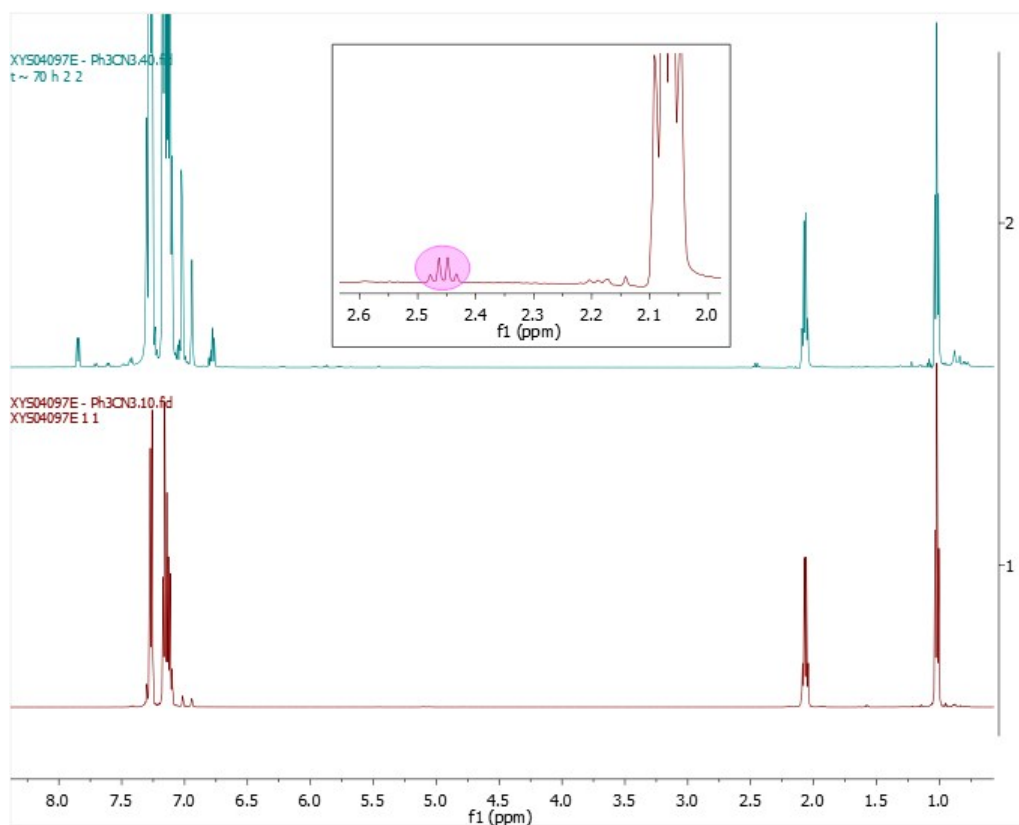

**Figure S44:** Before (bottom,  $t = 0\text{ h}$ ) and after (top,  $t = 70\text{ h}$ )  $^1\text{H}$  spectrum of 3-hexyne and trityl azide reaction in  $\text{C}_6\text{D}_5\text{Br}$ .

### Characterization of cyclotrimerization byproducts in C<sub>6</sub>D<sub>5</sub>Br

Characterization of hexamethylbenzene (9a), 1,3,5-tri-*n*-butyl-benzene (9e) and 1,2,4-tri-*n*-butyl-benzene (9e) in C<sub>6</sub>D<sub>5</sub>Br were reported previously.<sup>3</sup>

#### Hexamethylbenzene (9b)

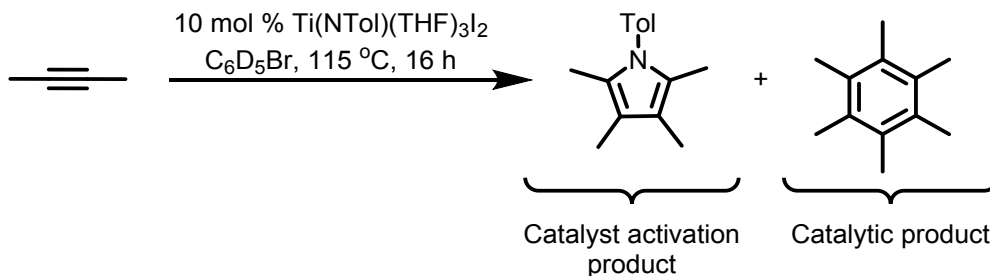

2-butyne (13 mg, 0.24 mmol, 1.0 equiv.), Ti(NTol)(THF)<sub>3</sub>I<sub>2</sub> (11 mg, 0.02 mmol, 10 mol %) and 0.5 mL of C<sub>6</sub>D<sub>5</sub>Br were added to a NMR tube in a N<sub>2</sub>-filled glovebox. The tube was sealed and heated at 115 °C for 16 h. After which, the reaction mixture was analyzed by <sup>1</sup>H NMR without any further work-up to give a mixture of the title compounds.

#### Hexamethylbenzene

<sup>1</sup>H NMR (500 MHz, C<sub>6</sub>D<sub>5</sub>Br): δ 2.11 (s, 18H, CH<sub>3</sub>)

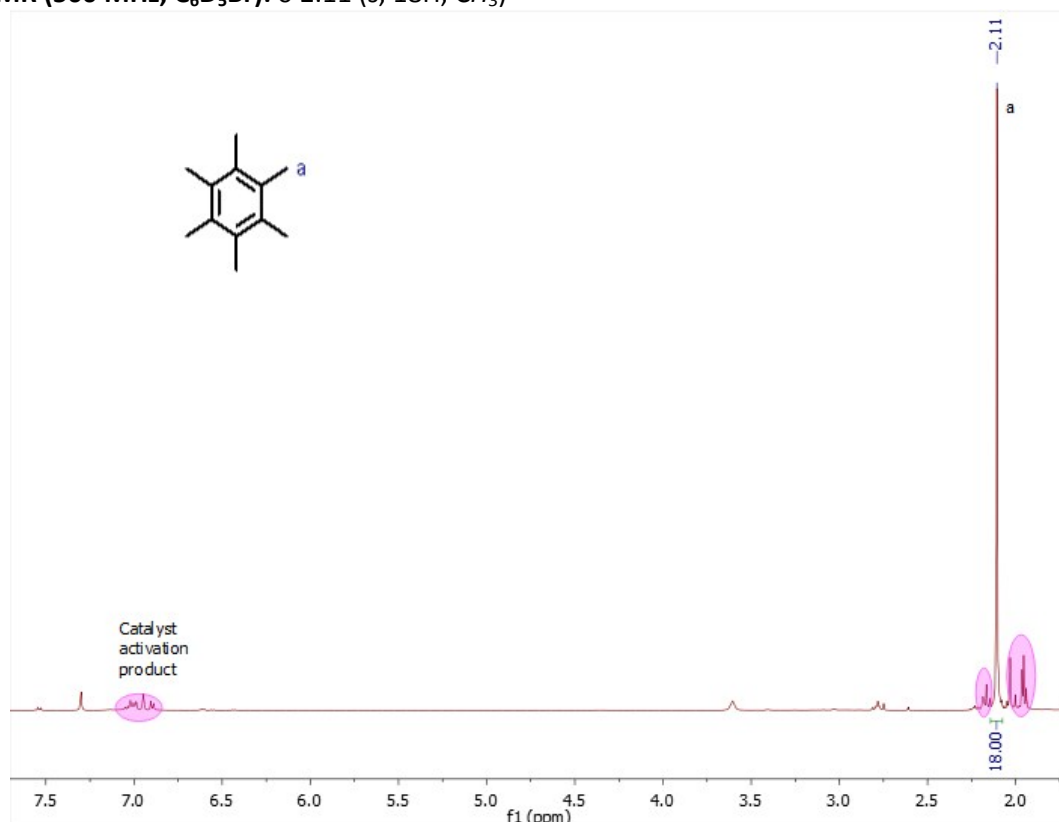

Figure S45: <sup>1</sup>H spectrum of hexamethylbenzene in C<sub>6</sub>D<sub>5</sub>Br.

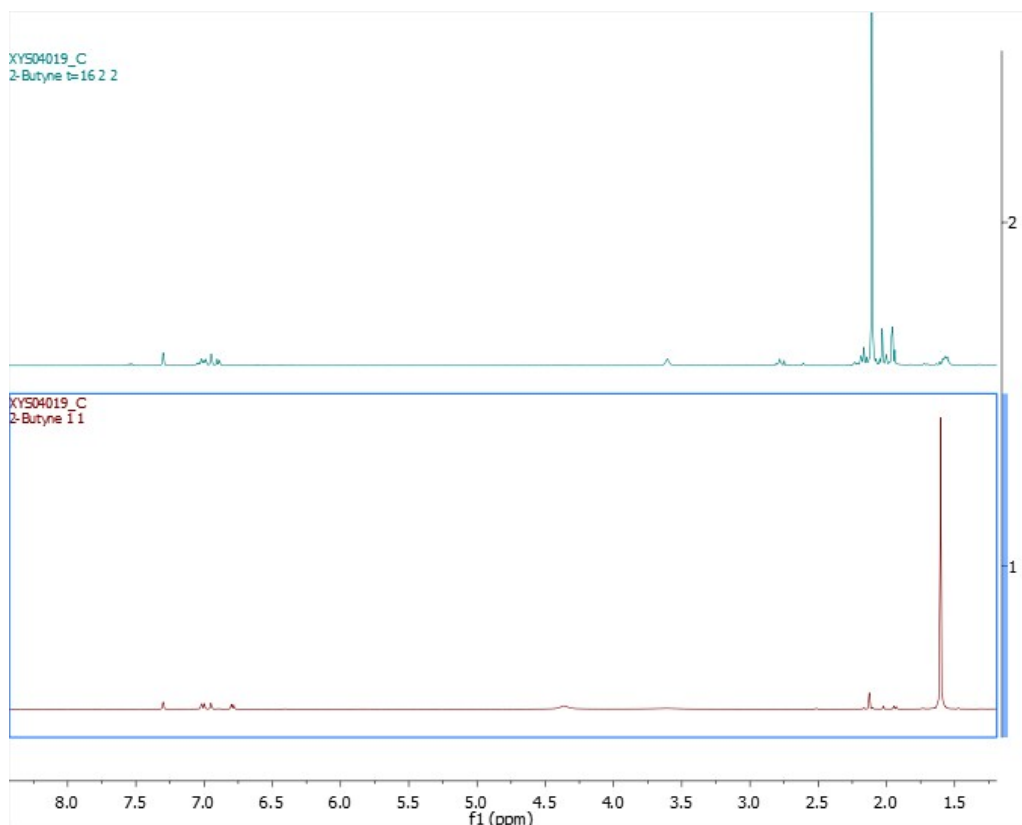

**Figure S46:** Before (bottom,  $t = 0$  h) and after (top,  $t = 16$  h)  $^1\text{H}$  spectrum of hexaethylbenzene in  $\text{C}_6\text{D}_5\text{Br}$ .

#### Attempted cyclotrimerization of diphenylacetylene (9c)

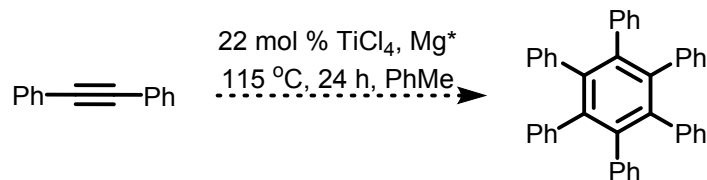

Diphenylacetylene (128 mg, 0.72 mmol, 1 equiv.),  $\text{TiCl}_4$  (30 mg, 0.16 mmol, 22 mol %),  $\text{Mg}^*$  (41 mg, 0.098 mmol, 14 mol %) and 0.5 mL of toluene were added to a 20 mL scintillation vial equipped with a small stirbar in a  $\text{N}_2$ -filled glovebox. This was then sealed with a Teflon screw cap and heated at  $115\text{ }^\circ\text{C}$  for 24 h. After which, the reaction mixture was concentrated *in vacuo* to dryness before dissolving in minimal  $\text{C}_6\text{D}_5\text{Br}$ . The mixture was filtered through celite before analysis to give a mixture of mostly starting materials and residual toluene.

In light of the slow/no reactivity, we do not think that this by-product formation will be significant in our catalytic reaction.

\*Anthracene peaks



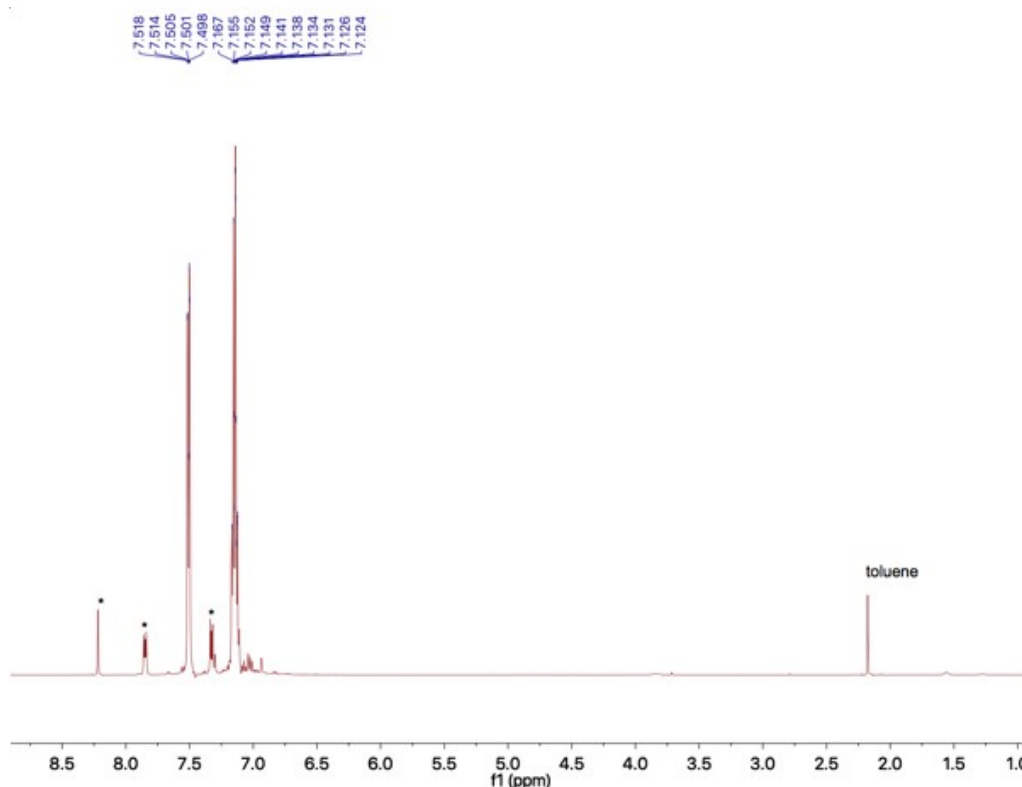

**Figure S47:** Post reaction  $^1\text{H}$  spectrum of diphenylacetylene treated with  $\text{TiCl}_4$  and  $\text{Mg}^*$  in  $\text{C}_6\text{D}_5\text{Br}$ .  
 \* Major peaks in the aromatic region are identical to diphenylacetylene.

**1,2,4-trimethyl-3,5,6-triphenylbenzene and 1,3,5-trimethyl-2,4,6-triphenylbenzene (9d) (partial)**

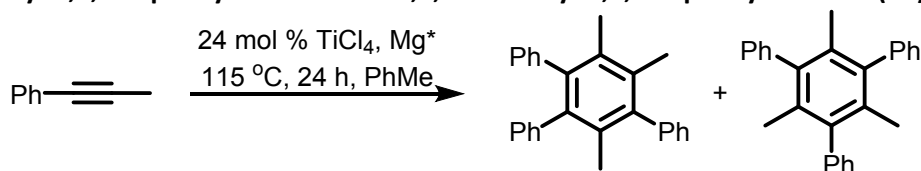

1-phenyl-1-propyne (78 mg, 0.67 mmol, 1 equiv.),  $\text{TiCl}_4$  (30 mg, 0.16 mmol, 24 mol %),  $\text{Mg}^*$  (31 mg, 0.07 mmol, 10 mol %) and 0.5 ml PhMe were added to a 20 mL scintillation vial equipped with a small stirbar in a  $\text{N}_2$ -filled glovebox. This was then sealed with a Teflon screw cap and heated at  $115^\circ\text{C}$  for 24 h. After which, the reaction mixture was concentrated *in vacuo* to dryness before dissolving in minimal  $\text{C}_6\text{D}_5\text{Br}$ . The mixture was filtered through celite before analysis to give a mixture of the two products, starting material and residual anthracene peaks from  $\text{Mg}^*$ .

**1,2,4-trimethyl-3,5,6-triphenylbenzene**

$^1\text{H}$  NMR (500 MHz,  $\text{C}_6\text{D}_5\text{Br}$ ):  $\delta$  2.08 (s, 3H, C1- $\text{CH}_3$ ), 2.05 (s, 3H, C2- $\text{CH}_3$  or C4- $\text{CH}_3$ ), 1.90 (s, 3H, C2- $\text{CH}_3$  or C4- $\text{CH}_3$ )

This is a partial NMR line list, the aromatic region is unable to be differentiated from the other isomer and starting material.

**1,3,5-trimethyl-2,4,6-triphenylbenzene**

$^1\text{H}$  NMR (500 MHz,  $\text{C}_6\text{D}_5\text{Br}$ ):  $\delta$  1.88 (s, 9H, Ar- $\text{CH}_3$ )

This is a partial NMR line list, the aromatic region is unable to be differentiated from the other isomer and starting material.

\* Anthracene peaks

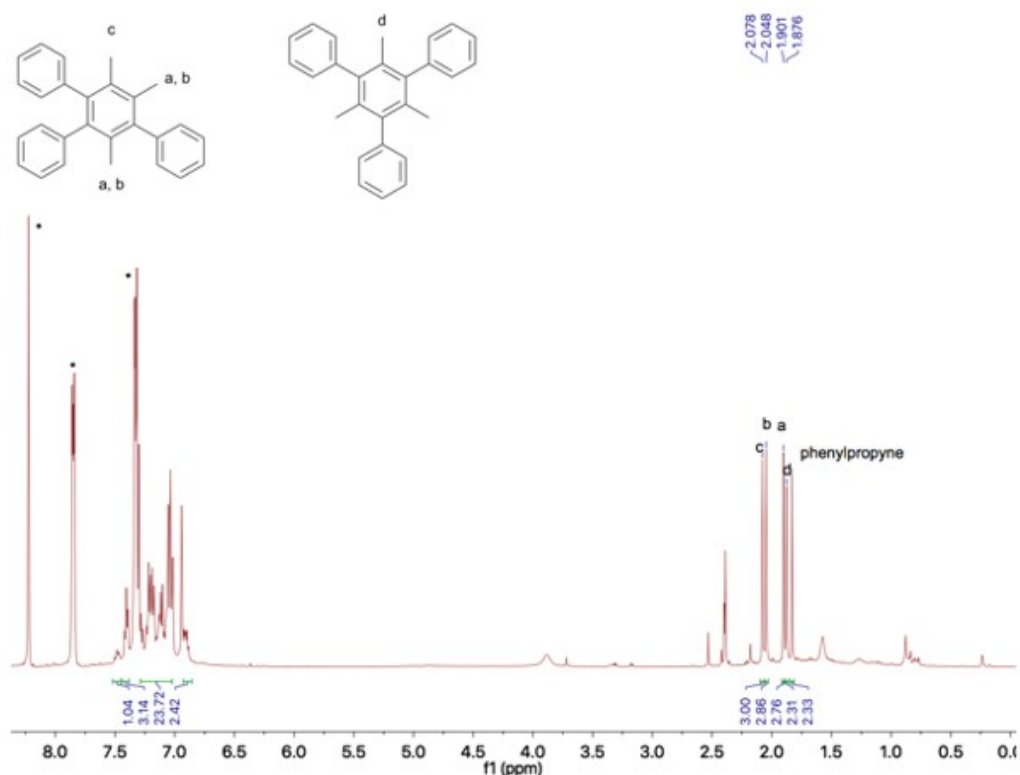

**Figure S48:**  $^1\text{H}$  spectrum of 1,2,4-trimethyl-3,5,6-triphenylbenzene and 1,3,5-trimethyl-2,4,6-triphenylbenzene in  $\text{C}_6\text{D}_5\text{Br}$ .

\* Integration of the aryl region is consistent with the integration of two trimerization isomers and remaining 1-phenyl-1-propyne.

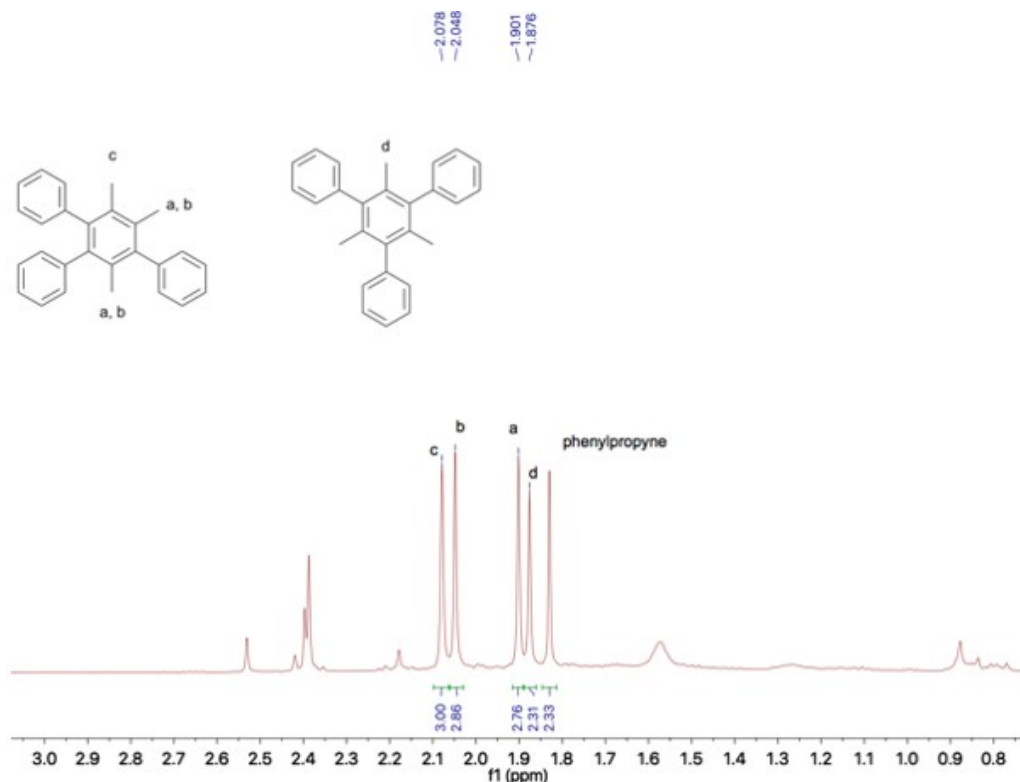

**Figure S49:** Zoom-in  $^1\text{H}$  spectrum of 1,2,4-trimethyl-3,5,6-triphenylbenzene and 1,3,5-trimethyl-2,4,6-triphenylbenzene in  $\text{C}_6\text{D}_5\text{Br}$ .

### 1,3,5-tri(*p*-tolyl)benzene (9f)<sup>8</sup>

Title compound was synthesized following literature procedure and purified with a silica column using pure hexanes as eluent.

**<sup>1</sup>H NMR (400 MHz, C<sub>6</sub>D<sub>5</sub>Br):** δ 7.80 (s, 3H, Ar-*H*), 7.57 (d, <sup>3</sup>*J*<sub>HH</sub> = 7.9 Hz, 6H, *m*-Tol-*H*), 7.18 (d, <sup>3</sup>*J*<sub>HH</sub> = 7.9 Hz, 6H, *o*-Tol-*H*), 2.28 (s, 9H, CH<sub>3</sub>)

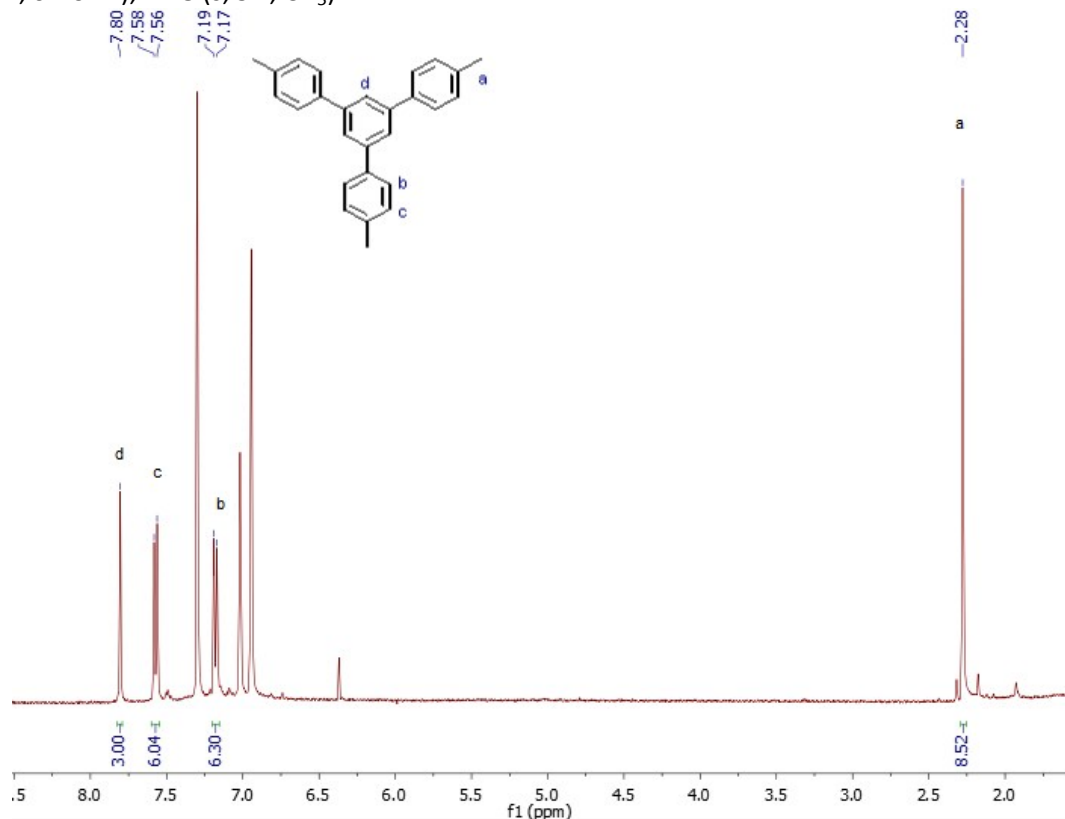

Figure S50: <sup>1</sup>H spectrum of 1,3,5-tri(*p*-tolyl)benzene in C<sub>6</sub>D<sub>5</sub>Br.

### 1,2,4-tri(*p*-tolyl)benzene (9f)<sup>9</sup>

Title compound was synthesized following literature procedure and purified further with an alumina plug (pure hexanes eluent).

**<sup>1</sup>H NMR (400 MHz, C<sub>6</sub>D<sub>5</sub>Br):** δ 7.70 – 7.69 (m, 1H, Ar-*H*), 7.60 – 7.46 (m, 4H, Ar-*H* and Tol-*H*), 7.16 – 7.14 (m, 6H, Tol-*H*), 6.93 – 6.91 (m, 4H, Tol-*H*), 2.27 (s, 3H, Tol-CH<sub>3</sub>), 2.12 (s, 6H, Tol-CH<sub>3</sub>)

Multiplet between 6.93 – 6.91 is partially overlapped by C<sub>6</sub>D<sub>5</sub>Br solvent peak.

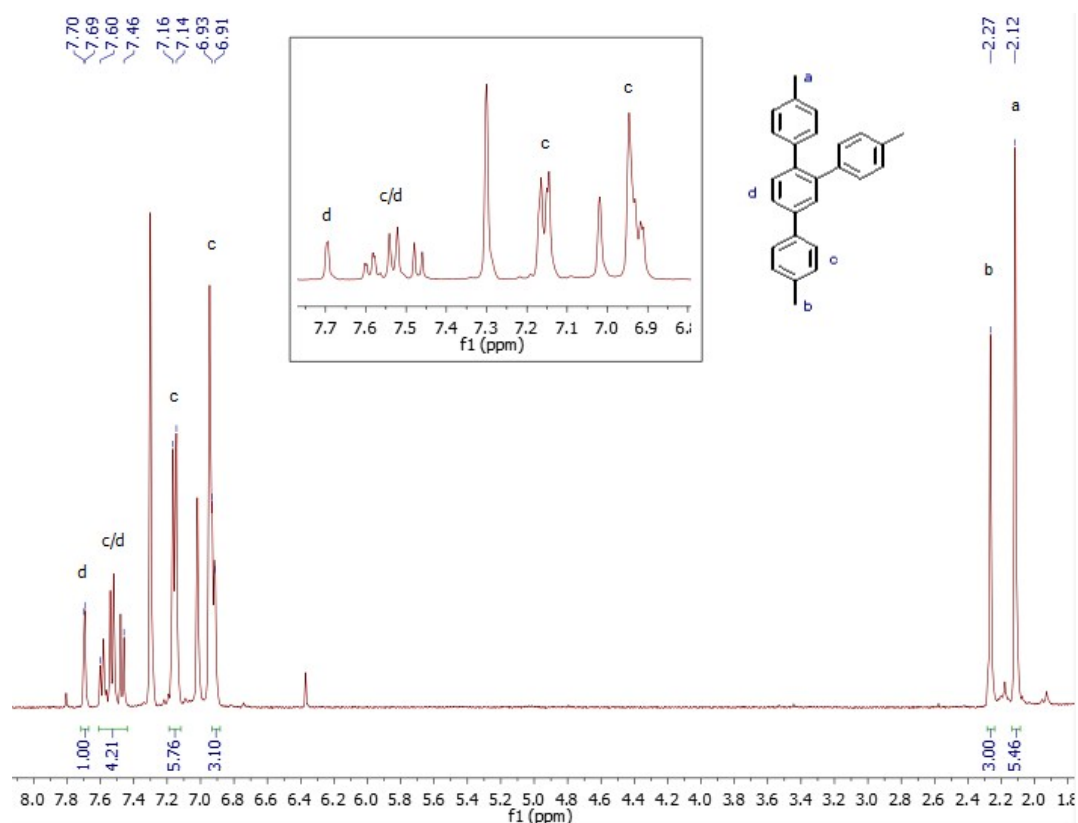

Figure S51: <sup>1</sup>H spectrum of 1,2,4-tri(*p*-tolyl)benzene in C<sub>6</sub>D<sub>5</sub>Br.

### 1,3,5-tri(*t*-butyl)benzene and 1,2,4-tri(*t*-butyl)benzene (9g)

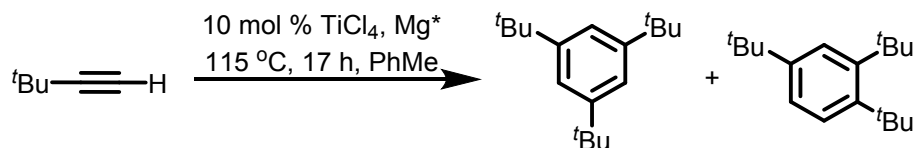

(*t*-butyl)acetylene (56 mg, 0.69 mmol, 1 equiv.), TiCl<sub>4</sub> (13 mg, 0.07 mmol, 10 mol %), Mg\* (30 mg, 0.07 mmol, 12 mol %) and 0.5 ml PhMe were added to a 4 mL scintillation vial equipped with a small stirbar in a N<sub>2</sub>-filled glovebox. This was then sealed with a Teflon screw cap and heated at 115 °C for 17 h. After which, the reaction mixture was concentrated *in vacuo* to dryness before dissolving in minimal C<sub>6</sub>D<sub>5</sub>Br. The mixture was filtered through celite before analysis to give a mixture of the two products and the residual anthracene peaks from Mg\*.

#### 1,3,5-tri(*t*-butyl)benzene

<sup>1</sup>H NMR (500 MHz, C<sub>6</sub>D<sub>5</sub>Br): δ 7.34 (s, 3H, Ar-*H*), 1.33 (s, 27H, *t*Bu)

#### 1,2,4-tri(*t*-butyl)benzene

<sup>1</sup>H NMR (500 MHz, C<sub>6</sub>D<sub>5</sub>Br): δ 7.66 (d, <sup>4</sup>*J*<sub>HH</sub> = 2.0 Hz, 1H, C3-Ar-*H*), 7.50 (d, <sup>3</sup>*J*<sub>HH</sub> = 8.5 Hz, 1H, C5 or C6-Ar-*H*), 7.10 (dd, <sup>3</sup>*J*<sub>HH</sub> = 8.5 Hz and <sup>4</sup>*J*<sub>HH</sub> = 2.1 Hz, 1H, C5 or C6-Ar-*H*), 1.52 (s, 9H, *t*Bu), 1.48 (s, 9H, *t*Bu), 1.27 (s, 9H, *t*Bu)

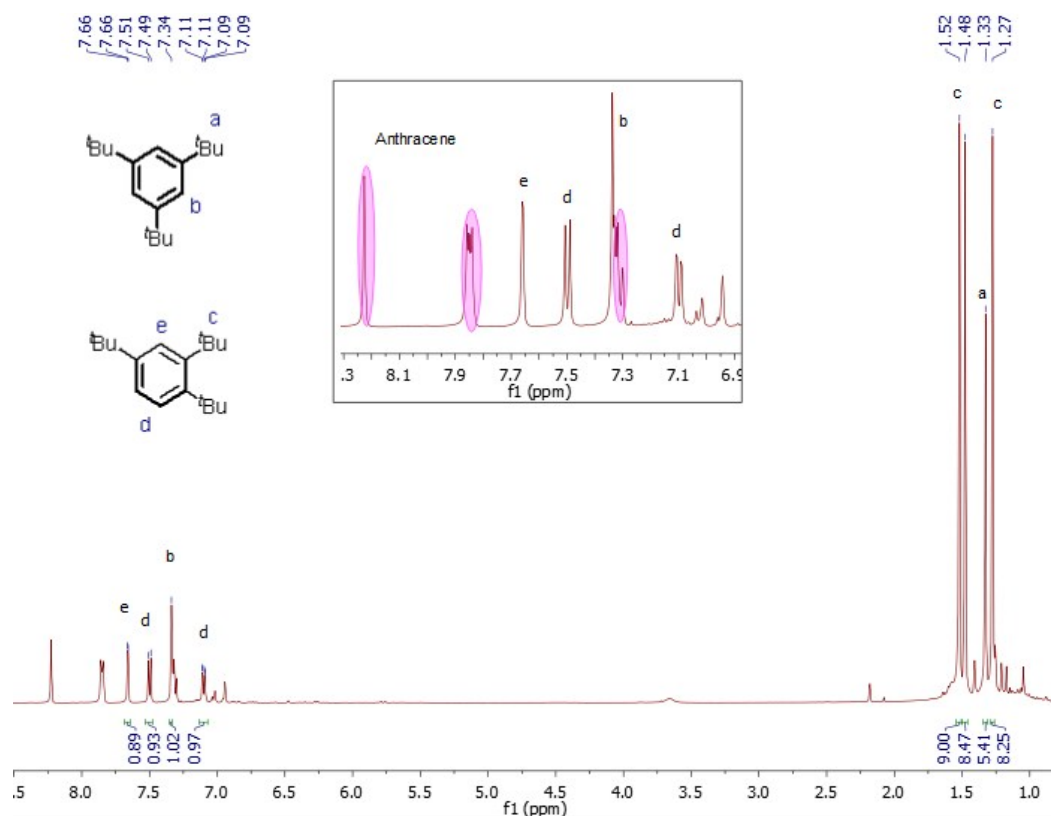

**Figure S52:**  $^1\text{H}$  spectrum of 1,3,5-tri(*t*-butyl)benzene and 1,2,4-tri(*t*-butyl)benzene in  $\text{C}_6\text{D}_5\text{Br}$ .

### 1,3,5-tris(trimethylsilyl)benzene and 1,2,4-tris(trimethylsilyl)benzene (9h)

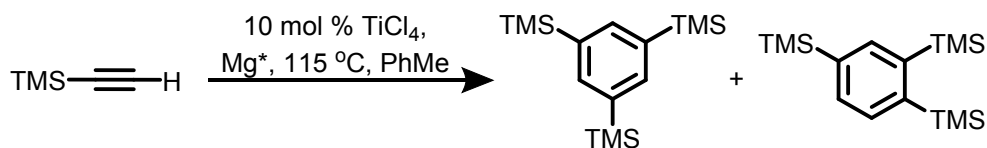

(Trimethylsilyl)acetylene (60 mg, 0.61 mmol, 1 equiv.),  $\text{TiCl}_4$  (12 mg, 0.06 mmol, 10 mol %),  $\text{Mg}^*$  (30 mg, 0.07 mmol, 12 mol %) and 0.5 ml PhMe were added to a 4 mL scintillation vial equipped with a small stirbar in a  $\text{N}_2$ -filled glovebox. This was then sealed with a Teflon screw cap and heated at 115  $^\circ\text{C}$  for 17 h. After which, the reaction mixture was concentrated *in vacuo* to dryness before dissolving in minimal  $\text{C}_6\text{D}_5\text{Br}$ . The mixture was filtered through celite before analysis to give a mixture of the two products and the residual anthracene peaks from  $\text{Mg}^*$ .

#### 1,3,5-tris(trimethylsilyl)benzene

$^1\text{H}$  NMR (400 MHz,  $\text{C}_6\text{D}_5\text{Br}$ ):  $\delta$  7.85 (s, 3H, Ar-H), 0.30 (s, 27 H,  $\text{Si}(\text{CH}_3)_3$ )

Singlet at  $\delta$  7.85 is partially overlapped by residual anthracene peak.

#### 1,2,4-tris(trimethylsilyl)benzene

$^1\text{H}$  NMR (400 MHz,  $\text{C}_6\text{D}_5\text{Br}$ ):  $\delta$  7.95 (s, 1H, C3-Ar-H), 7.67 (d,  $^3J_{\text{HH}} = 7.4$  Hz, 1H, C5 or C6-Ar-H), 7.47 (d,  $^3J_{\text{HH}} = 7.4$  Hz, 1H, C5 or C6-Ar-H), 0.38 (s, 9H,  $\text{Si}(\text{CH}_3)_3$ ), 0.37 (s, 9H,  $\text{Si}(\text{CH}_3)_3$ ), 0.27 (s, 9H,  $\text{Si}(\text{CH}_3)_3$ )

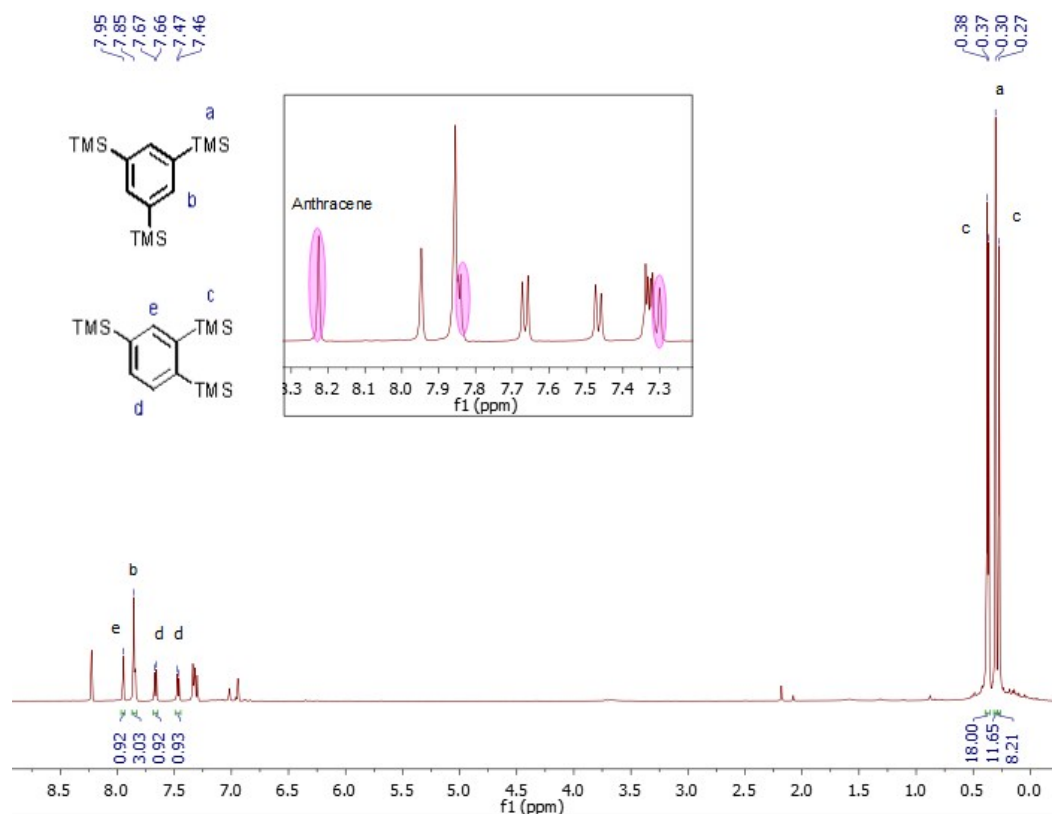

**Figure S53:** <sup>1</sup>H spectrum of 1,3,5-tris(trimethylsilyl)benzene and 1,2,4-tris(trimethylsilyl)benzene in C<sub>6</sub>D<sub>5</sub>Br.

#### 1,4-bis(5,6,7,8-tetrahydronaphthalen-2-yl)butane (9i)

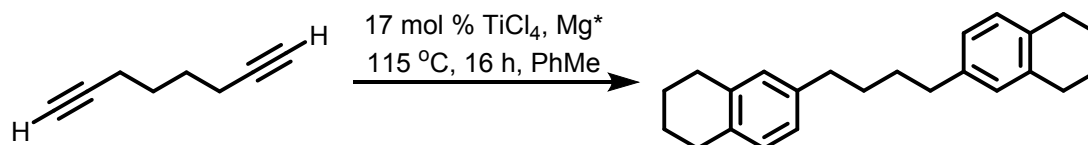

1,7-Octadiyne (81 mg, 0.76 mmol, 1 equiv.), TiCl<sub>4</sub> (24 mg, 0.13 mmol, 17 mol %), Mg\* (29 mg, 0.069 mmol, 9 mol %) and 0.5 ml PhMe were added to a 20 mL scintillation vial equipped with a small stirbar in a N<sub>2</sub>-filled glovebox. This was then sealed with a Teflon screw cap and heated at 115 °C for 16 h. After which, the reaction mixture was concentrated *in vacuo* to dryness before dissolving in minimal C<sub>6</sub>D<sub>5</sub>Br. The mixture was filtered through celite before analysis to the product, starting material and residual anthracene peaks from Mg\*.

#### 1,4-bis(5,6,7,8-tetrahydronaphthalen-2-yl)butane

<sup>1</sup>H NMR (500 MHz, C<sub>6</sub>D<sub>5</sub>Br): δ 7.02-6.78 (m (br), 6H, Ar-H), 2.62-2.60 (m (br), 8H, Ar-CH<sub>2</sub>), 2.52 (m (br), 4H, Ar-CH<sub>2</sub>), 1.62 (m (br), 12H, CH<sub>2</sub>-CH<sub>2</sub>CH<sub>2</sub>-CH<sub>2</sub>).

\* Anthracene peaks

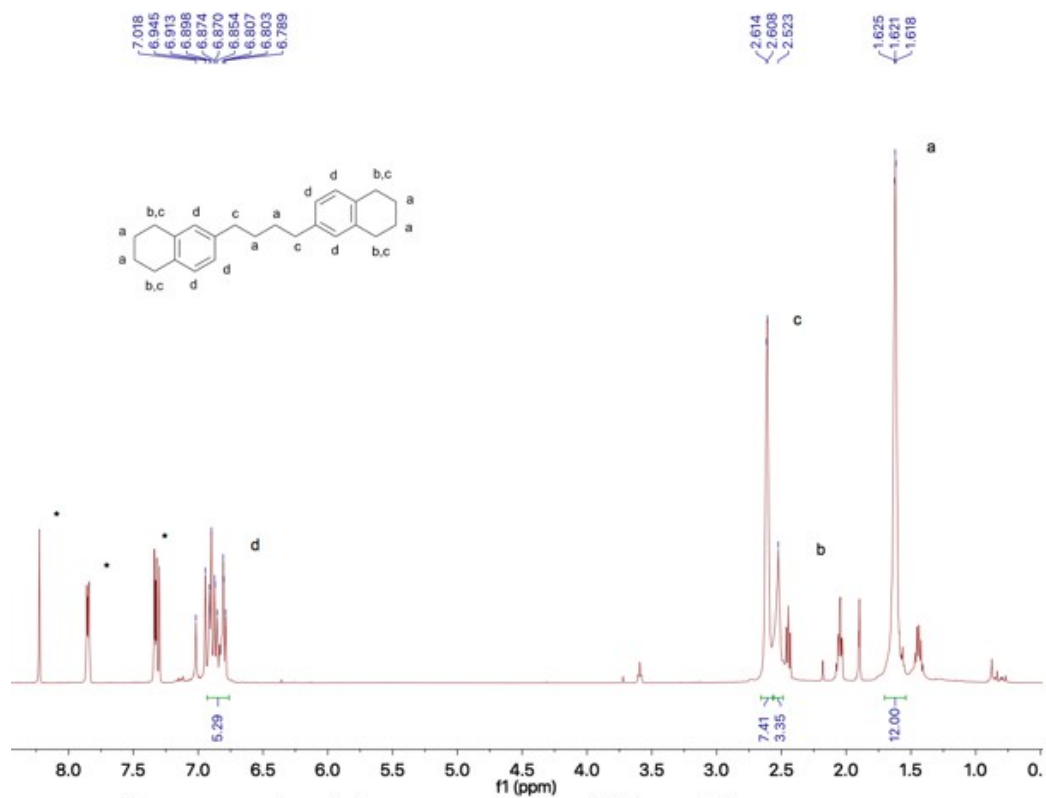

**Figure S54:** <sup>1</sup>H spectrum of 1,4-bis(5,6,7,8-tetrahydronaphthalen-2-yl)butane in C<sub>6</sub>D<sub>5</sub>Br.

### NMR analysis of initial catalytic run with (*p*-tolyl)azide and 3-hexyne

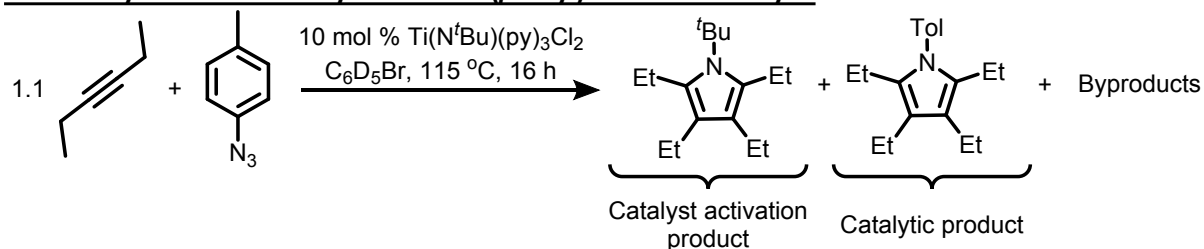

(*p*-tolyl)azide (26 mg, 0.20 mmol, 1 equiv.) and  $\text{Ti}(\text{N}^t\text{Bu})(\text{py})_3\text{Cl}_2$  (8 mg, 0.02 mmol, 10 mol %) were massed into a screw cap NMR tube.  $\text{C}_6\text{D}_5\text{Br}$  (0.5 mL) and 3-hexyne (25  $\mu\text{L}$ , 0.22 mmol, 1.1 equiv.) were then added, and the tube was sealed and heated to 110 $^\circ\text{C}$ . The reaction mixture was monitored *in-situ* without workup to give the following products.

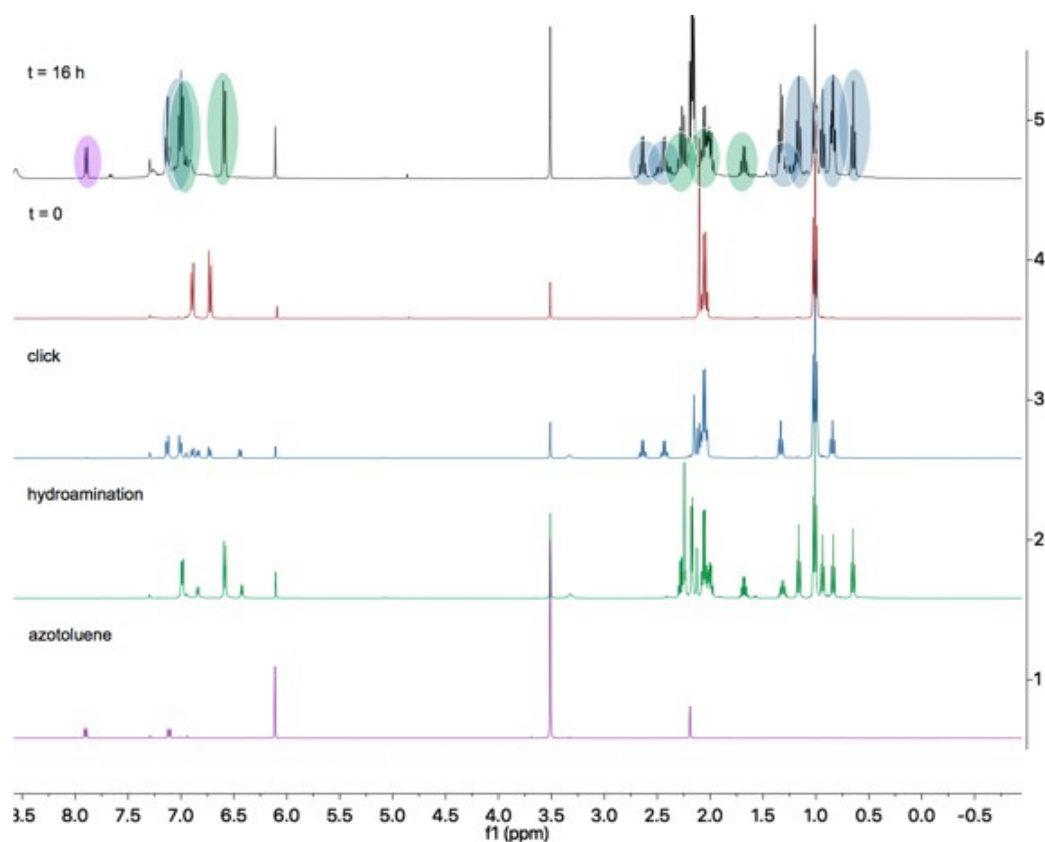

**Figure S55:** Stacked  $^1\text{H}$  spectrum of (*p*-tolyl)azide reaction with 3-hexyne at  $t = 16 \text{ h}$  (5),  $t = 0 \text{ h}$  (4) click (3), hydroamination control (2) and authentic 4,4'-azotoluene (1) in  $\text{C}_6\text{D}_5\text{Br}$ .

\* Byproducts in the catalytic mixture are highlighted by their respective colors.



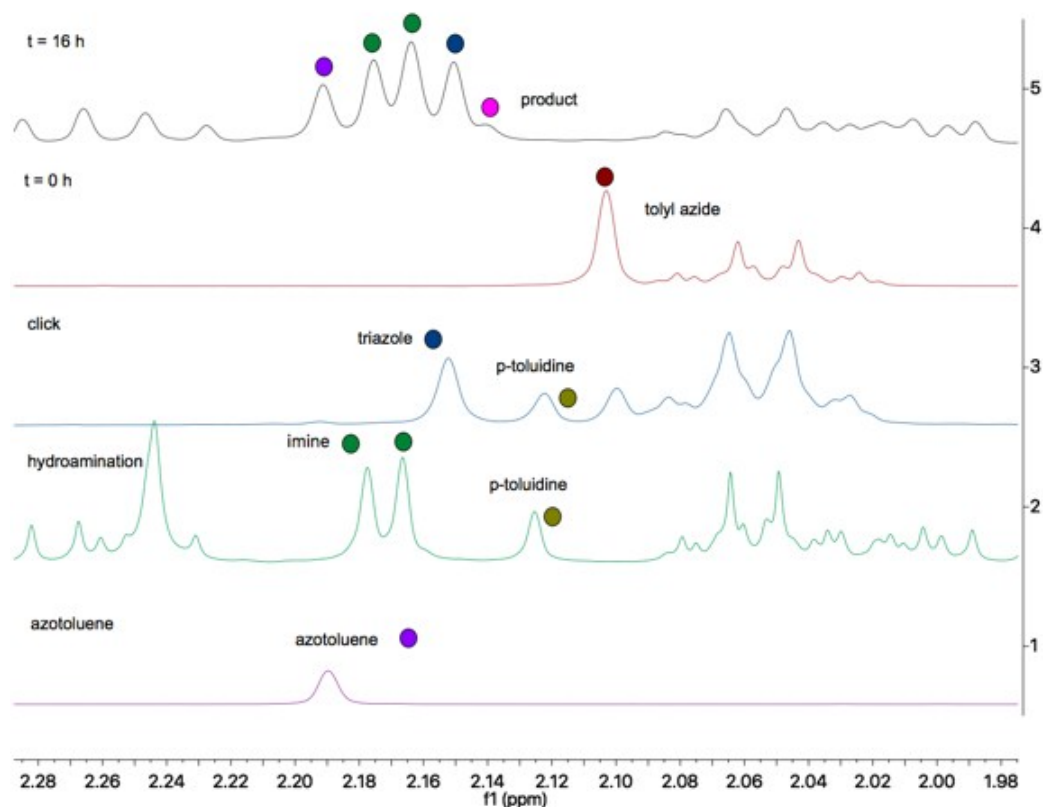

**Figure S56:** Zoom-in stacked <sup>1</sup>H spectrum of (*p*-tolyl)azide reaction with 3-hexyne at *t* = 16 h (5), *t* = 0 h (4) click (3), hydroamination control (2) and authentic 4,4'-azotoluene (1) in C<sub>6</sub>D<sub>5</sub>Br.

\* Byproducts in the catalytic mixture are highlighted by their respective colors.

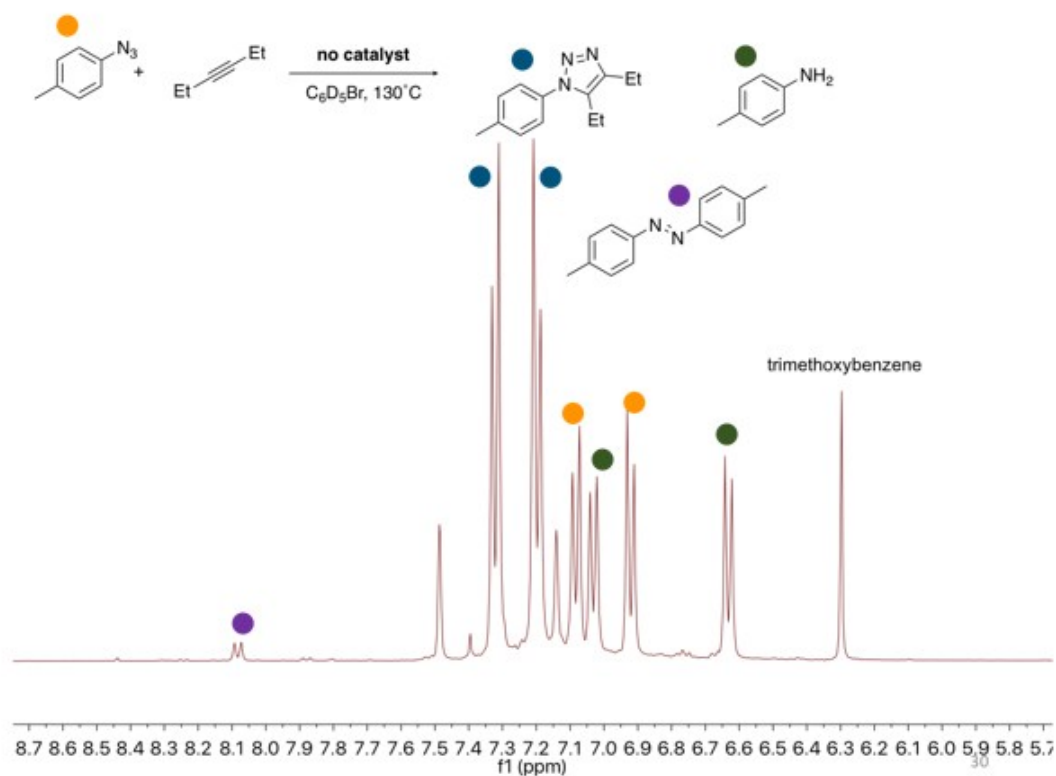

**Figure S57:** Zoom-in <sup>1</sup>H spectrum (aryl region) of (*p*-tolyl)azide reaction with 3-hexyne in the absence of catalyst. Byproducts are shown.

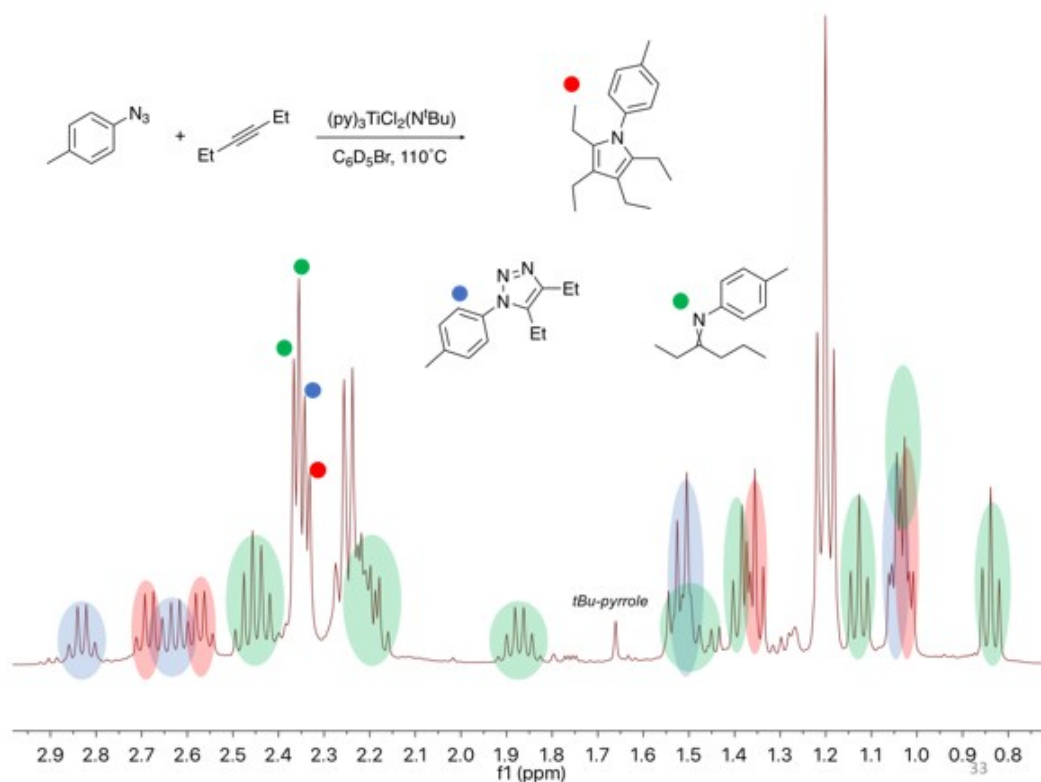

**Figure S58:** Zoom-in <sup>1</sup>H spectrum (alkyl region) of (*p*-tolyl)azide reaction with 3-hexyne in the absence of catalyst. Byproducts are shown.

## NMR analysis of catalytic reactions with internal alkyne substrates (Table 1)

### NMR analysis of 3-hexyne and 1-azidoadamantane reaction (Table 1, Entry 1)

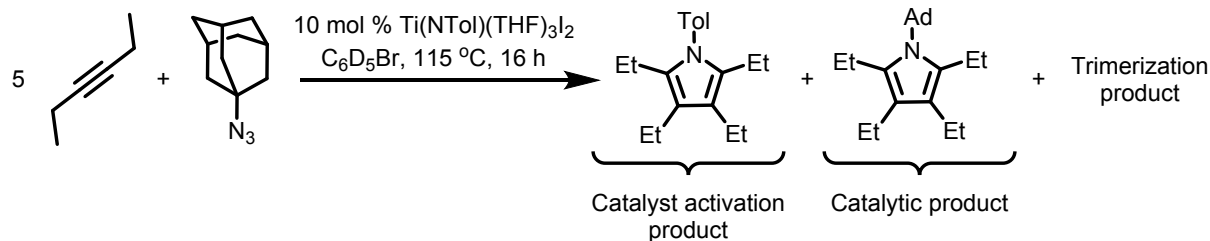

A standard catalytic run with 2-butyne (79  $\mu\text{L}$ , 1.0 mmol) and 0.5 mL of stock solution (internal alkyne screen) was conducted. The catalytic mixture was analyzed directly without any further purification and the products were identified *in-situ* to give a mixture of products shown above and leftover starting materials.

### 2,3,4,5-tetraethyl-1-adamantyl-1H-pyrrole

**$^1\text{H}$  NMR (400 MHz,  $\text{C}_6\text{D}_5\text{Br}$ ):**  $\delta$  2.83 (q,  $^3J_{\text{HH}} = 7.0$  Hz, 4H, C3- $\text{CH}_2$ ), 2.39 (q,  $^3J_{\text{HH}} = 7.0$  Hz, 4H, C2- $\text{CH}_2$ ), 2.28 (d,  $^3J_{\text{HH}} = 3$  Hz, 6H, N-C-( $\text{CH}_2$ ) $_3$ ), 2.02 (s (br), 3H, Ad-methine), 1.59 (m, 6H, Ad), 1.15 (t,  $^3J_{\text{HH}} = 7.0$  Hz, 6H, C3- $\text{CH}_2$ - $\text{CH}_3$ )

Peaks at  $\delta$  2.39, 2.02, 1.59, and 1.15 overlap with activation product, 3-hexyne, 1-azidoadamantane, trimerization byproduct and 3-hexyne respectively.

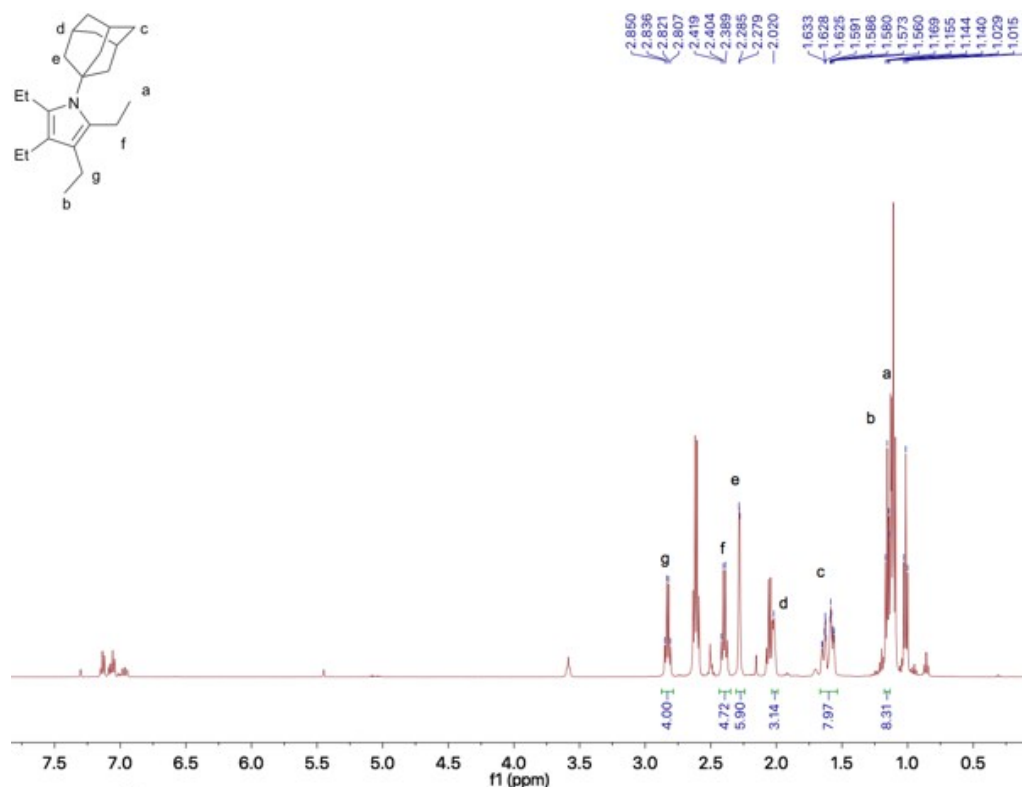

**Figure S59:**  $^1\text{H}$  spectrum of 3-hexyne reaction with 1-azidoadamantane in  $\text{C}_6\text{D}_5\text{Br}$ .

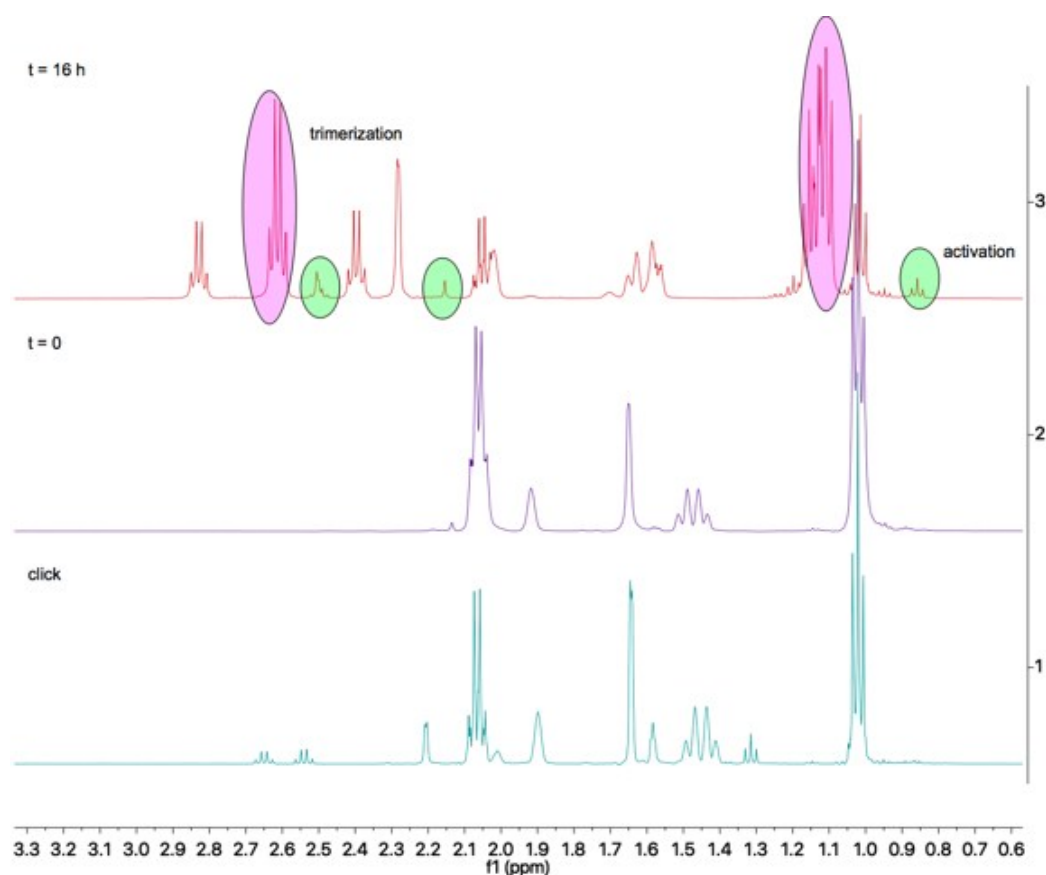

**Figure S60:** Zoom-in stacked  $^1\text{H}$  spectrum of 3-hexyne reaction with 1-azidoadamantane  $t = 16$  h (3),  $t = 0$  h (2) and click reaction (1) in  $\text{C}_6\text{D}_5\text{Br}$ .

\* Trimerization and activation pyrrole peaks are obtained from literature values<sup>3</sup> and highlighted in pink and green respectively.

**NMR analysis of 1-azidoadamantane and 3-hexyne reaction (Table 1, Entry 2)**

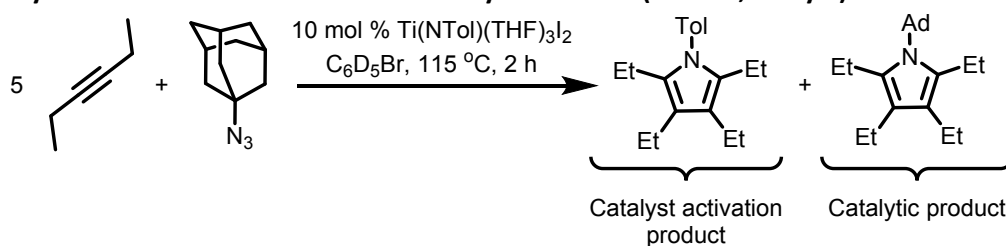

A standard catalytic run with [Ti] (6 mg, 0.01 mmol), 1-azidoadamantane (18 mg, 0.1 mmol, 1 equiv.) and 0.5 mL of stock solution (azide screen) was prepared and the reaction mixture was heated for 2 h. The catalytic mixture was analyzed directly without any further purification and the products were identified *in-situ* to give a mixture of products shown above and leftover starting materials.

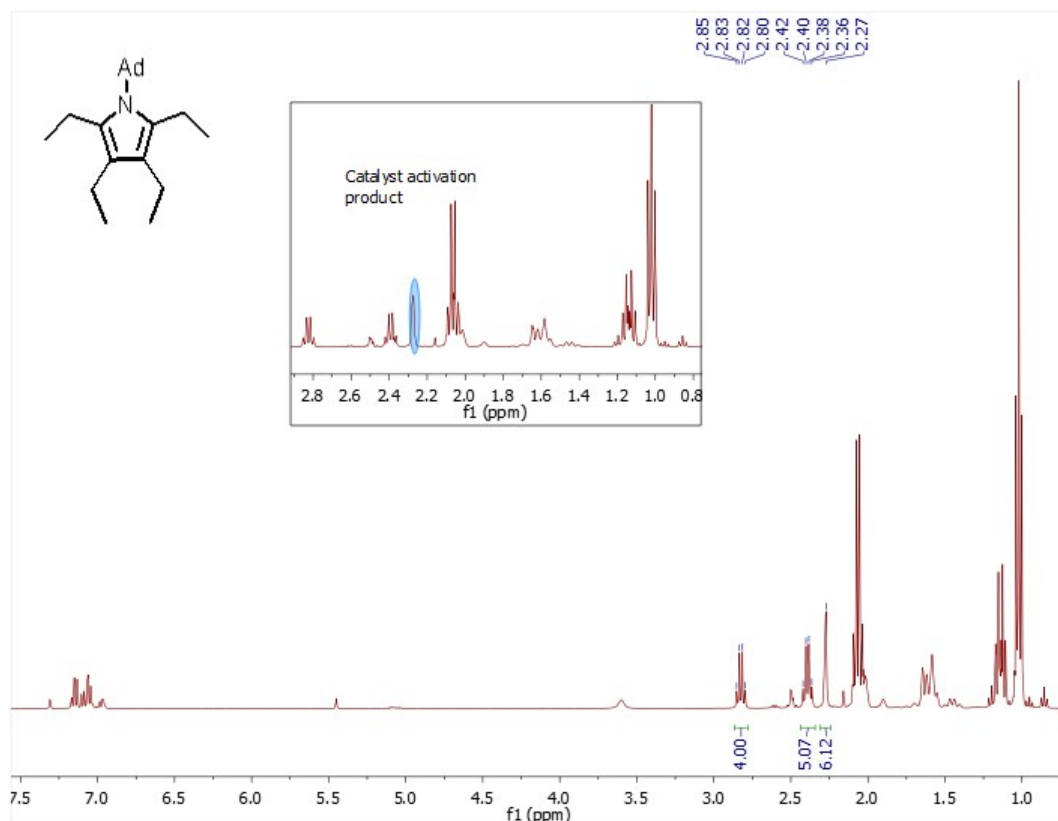

**Figure S61:**  $^1\text{H}$  spectrum of 1-azidoadamantane reaction with 3-hexyne ( $t = 2$  h) in  $\text{C}_6\text{D}_5\text{Br}$ .

#### Isolation of 2,3,4,5-tetraethyl-1-adamantyl-1H-pyrrole

To a 7 ml scintillation vial equipped with a stir-bar was added  $\text{Ti}(\text{NTol})\text{I}_2(\text{THF})_3$  (35 mg, 0.056 mmol, 10 mol %), 1-azidoadamantane (101 mg, 0.56 mmol, 1 equiv.), 2.8 ml  $\text{C}_6\text{H}_5\text{Br}$  and 3-hexyne (0.32 ml, 231 mg, 2.82 mmol, 5 equiv.) in the following order in a  $\text{N}_2$ -filled glovebox. The vial was then sealed and heated at  $115^\circ\text{C}$  for 2 h. After which, the reaction mixture was transferred into a 20 ml scintillation vial and dried under *vacuo* while heated to  $50^\circ\text{C}$  for several hours to give a black oil. The oil was taken up in minimal petroleum ether and purified over a silica column using an eluent of 3 % ethyl acetate / petroleum ether. The desired product elutes after the activation product (2,3,4,5-tetraethyl-1-tolyl-1H-pyrrole).

Due to a contamination by silicon oil during the column purification, the desired product was taken up again in  $\sim 1$  ml petroleum ether and loaded onto a small silica plug in a pipette.  $\sim 1$  ml of petroleum ether was first used to remove the impurities before washing the rest of the plug with  $\sim 2$  ml ethyl acetate. A light orange eluent was collected and dried under *vacuo* to give the desired product as a pale orange solid with some grease impurities (40 mg, 23 % yield).

#### 2,3,4,5-tetraethyl-1-adamantyl-1H-pyrrole

$^1\text{H}$  NMR (400 MHz,  $\text{CDCl}_3$ ):  $\delta$  2.84 (q,  $^3J_{\text{HH}} = 7.3$  Hz, 4H, *o*-N-pyr- $\text{CH}_2\text{CH}_3$ ), 2.40 – 2.34 (m, 10H, *m*-N-pyr- $\text{CH}_2\text{CH}_3$  and Ad- $\text{CH}_2$ ), 2.18 (br s, 3H, Ad-CH), 1.74 (q,  $^3J_{\text{HH}} = 12.2$  Hz, 6H, Ad- $\text{CH}_2$ ), 1.19 (t,  $^3J_{\text{HH}} = 7.3$  Hz, 6H, *o*-N-pyr- $\text{CH}_2\text{CH}_3$ ), 1.11 (t,  $^3J_{\text{HH}} = 7.5$  Hz, 6H, *o*-N-pyr- $\text{CH}_2\text{CH}_3$ ).

$^{13}\text{C}$  NMR (101 MHz,  $\text{CDCl}_3$ ):  $\delta$  130.5, 121.8, 60.5, 43.4, 36.5, 30.6, 21.7, 18.1, 17.5, 16.8

GC-HRMS ( $m/z$ ): calcd. for  $\text{C}_{22}\text{H}_{35}\text{N}$ , 313.2770 ; found, 313.2756

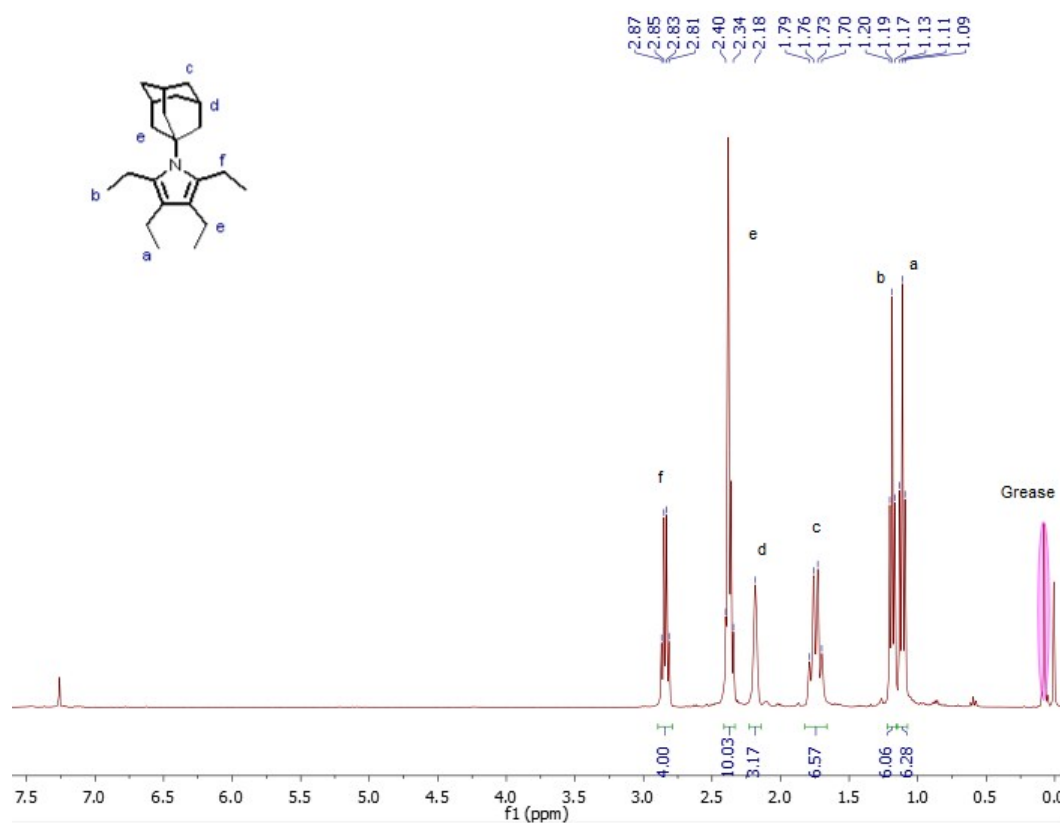

Figure S62:  $^1\text{H}$  spectrum of 2,3,4,5-tetraethyl-1-adamantyl-1H-pyrrole in CDCl<sub>3</sub>.

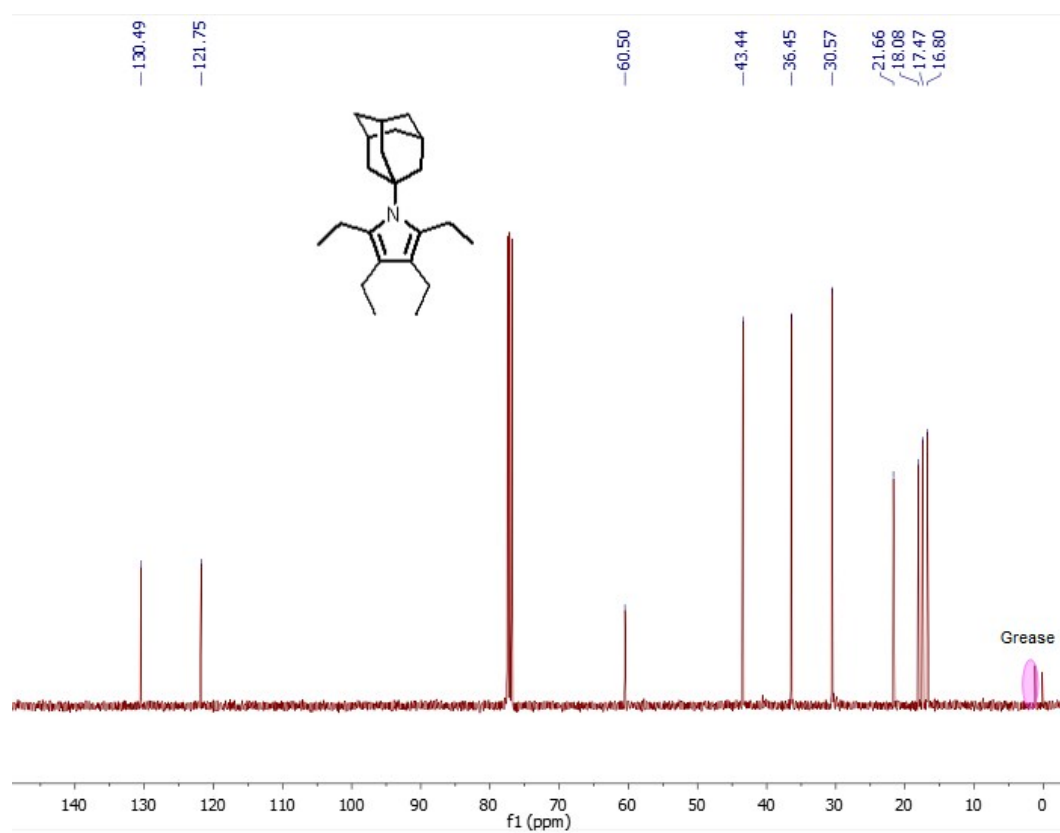

Figure S63:  $^{13}\text{C}$  spectrum of 2,3,4,5-tetraethyl-1-adamantyl-1H-pyrrole in CDCl<sub>3</sub>.

### NMR analysis of 2-butyne and 1-azidoadamantane reaction (Table 1, Entry 3)

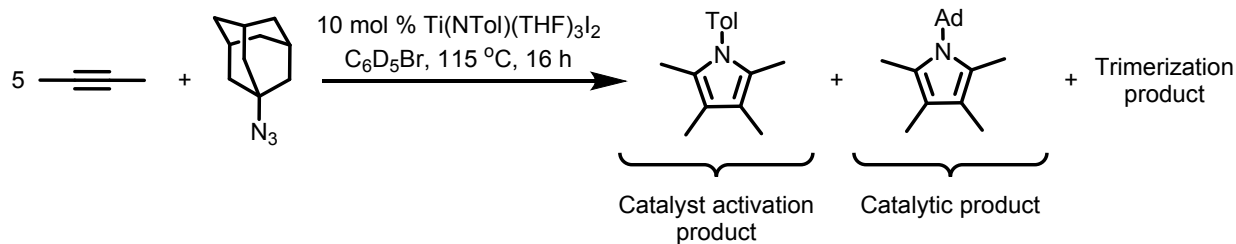

A standard catalytic run with 2-butyne (79  $\mu\text{L}$ , 1.0 mmol) and 0.5 mL of stock solution (internal alkyne screen) was conducted. The catalytic mixture was analyzed directly without any further purification and the products were identified *in-situ* to give a mixture of products shown above and leftover starting materials.

### 2,3,4,5-tetramethyl-1-(adamantyl)-1H-pyrrole (partial)

$^1\text{H}$  NMR (400 MHz,  $\text{C}_6\text{D}_5\text{Br}$ ):  $\delta$  2.35 (s, 6H, *o*-N-pyr- $\text{CH}_3$ ), 2.25 – 2.24 (m, 6H, Ad- $\text{CH}_2$ ), 1.92 (s, 6H, *m*-N-pyr- $\text{CH}_3$ ), 1.63 – 1.55 (m, 6H, Ad- $\text{CH}_2$ )

Peaks at  $\delta$  1.63 – 1.55 overlap with the 2-butyne starting reagent and the Ad-CH peak cannot be positively identified from the reaction mixture.

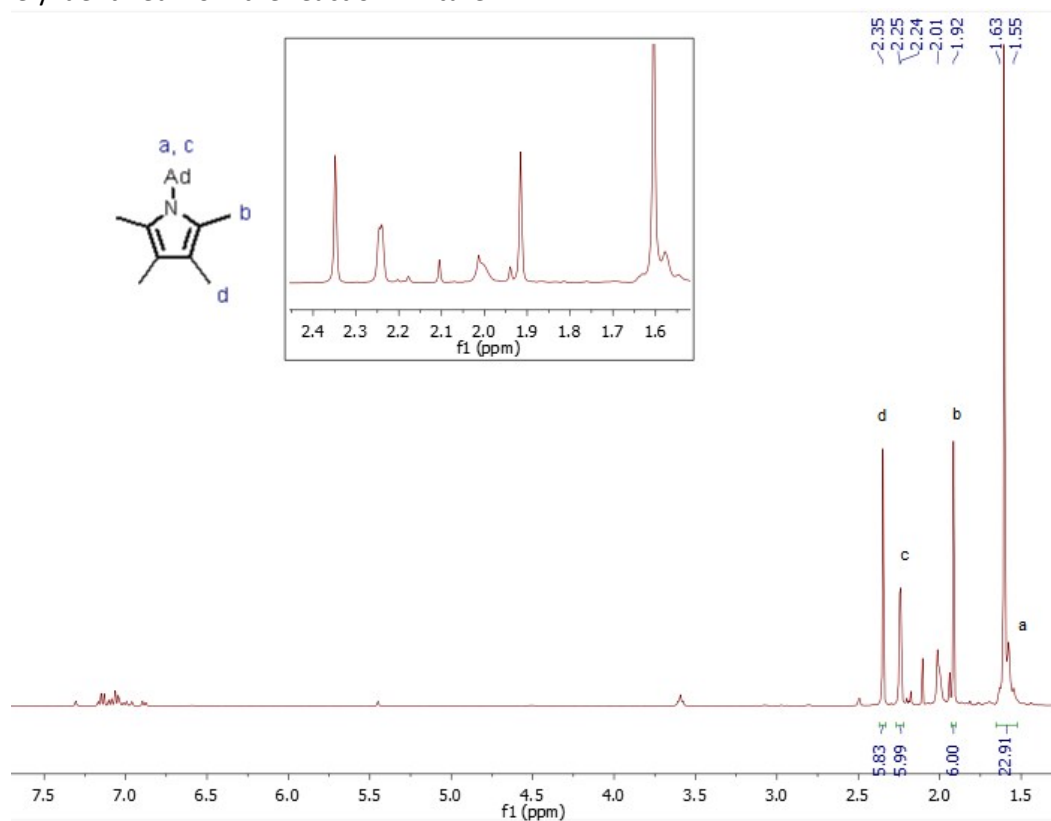

**Figure S64:**  $^1\text{H}$  spectrum of 2-butyne reaction with 1-azidoadamantane in  $\text{C}_6\text{D}_5\text{Br}$ .

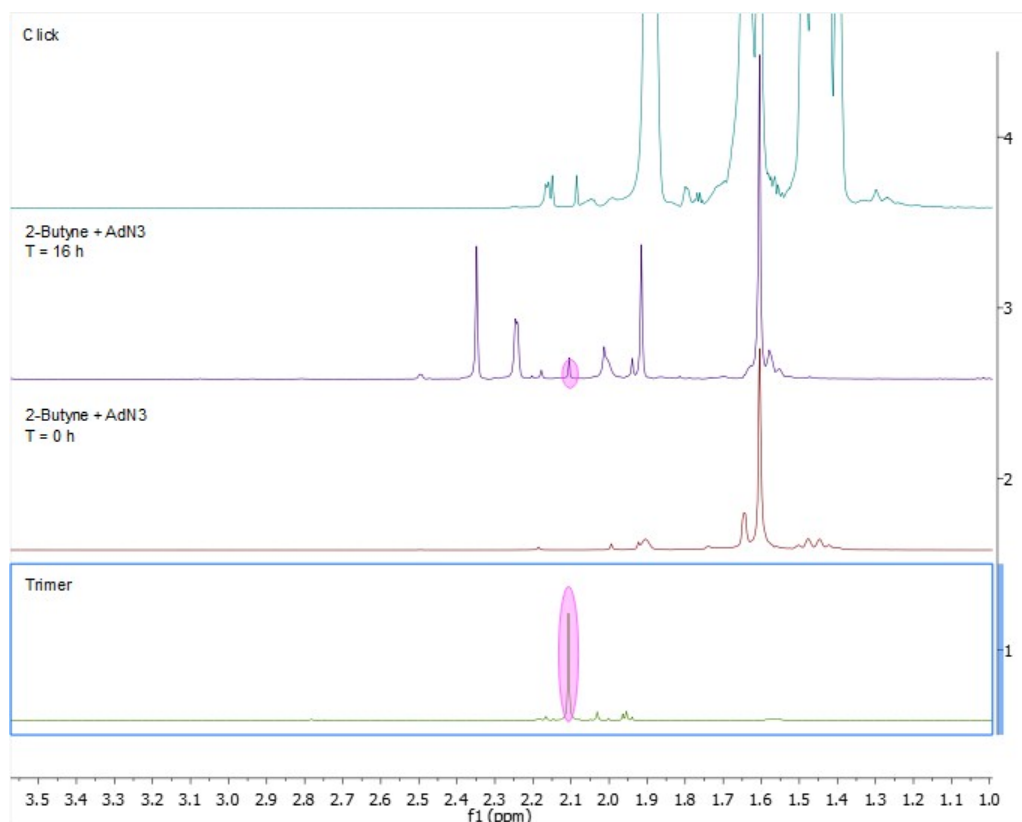

**Figure S65:** Zoom-in stacked  $^1\text{H}$  spectrum of click reaction (4), 2-butyne reaction with 1-azidoadamantane  $t = 16$  h (3),  $t = 0$  h (2) and trimer reaction (1) in  $\text{C}_6\text{D}_5\text{Br}$ .

**NMR analysis of diphenylacetylene and 1-azidoadamantane reaction (Table 1, Entry 4)**

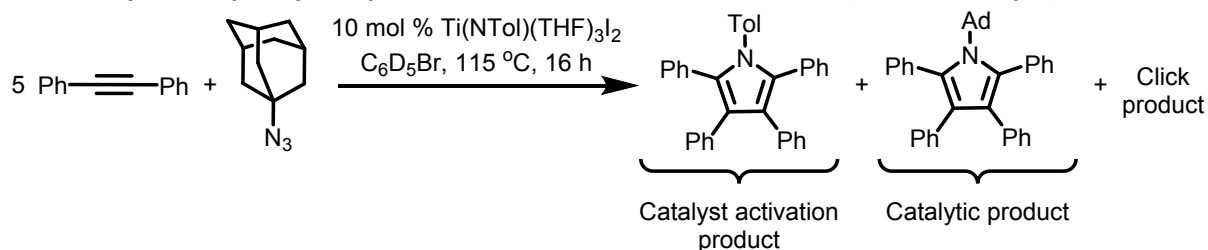

A standard catalytic run with diphenylacetylene (174 mg, 1.0 mmol) and 0.5 mL of stock solution (internal alkyne screen) was conducted. The catalytic mixture was analyzed directly without any further purification and the products were identified *in-situ* to give a mixture of products shown above and leftover starting materials.

**2,3,4,5-tetraphenyl-1-adamantyl-1H-pyrrole**

$^1\text{H}$  NMR (500 MHz,  $\text{C}_6\text{D}_5\text{Br}$ ):  $\delta$  2.50 or 2.20 (d,  $^3J_{\text{HH}} = 3.0$  Hz, 6H, N-C-( $\text{CH}_2$ ) $_3$ )

The rest of the peaks are buried beneath starting materials. A definitive assignment of peaks from product could not be made. Maximum product yield based on generated peaks after reaction is <5%.



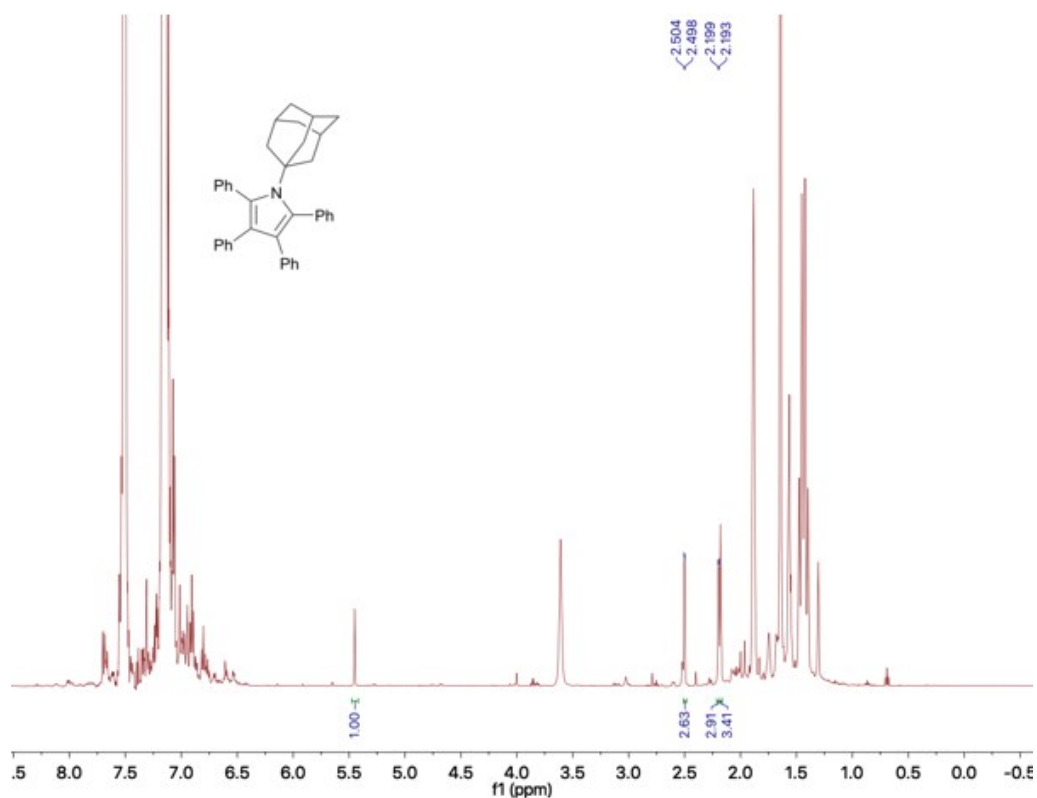

**Figure S66:**  $^1\text{H}$  spectrum of diphenylacetylene reaction with 1-azidoadamantane in  $\text{C}_6\text{D}_5\text{Br}$ .

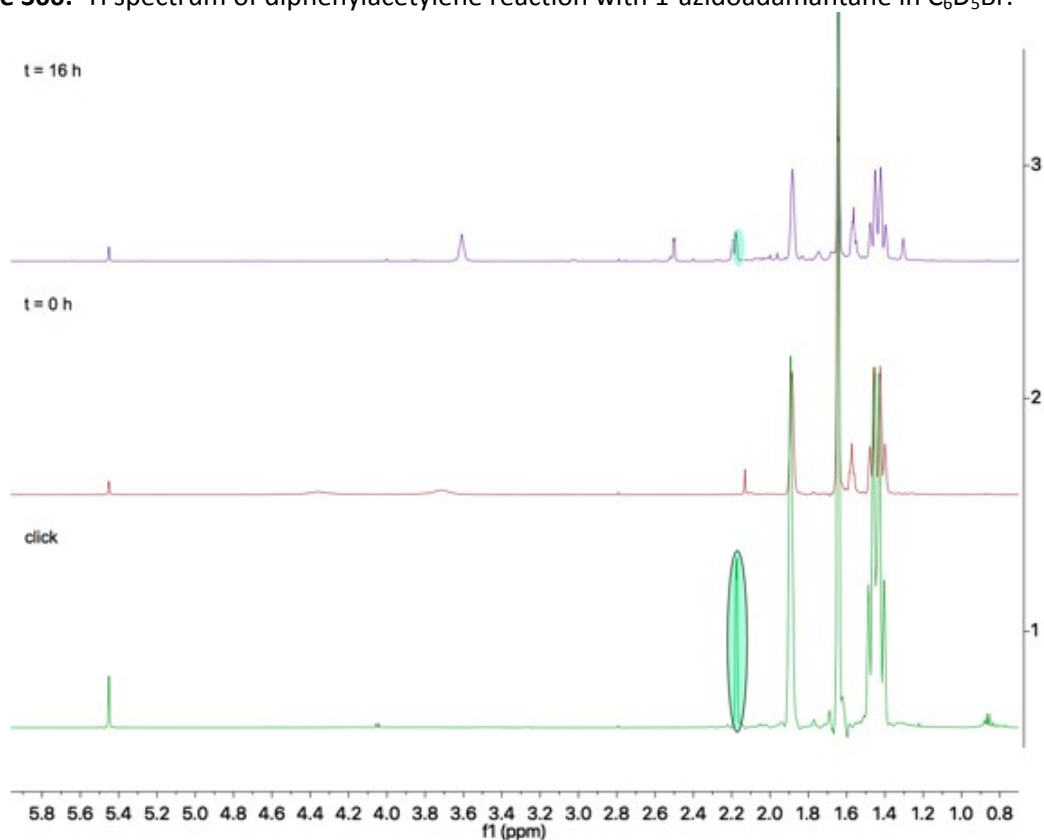

**Figure S67:** Stacked  $^1\text{H}$  spectrum of diphenylacetylene reaction with 1-azidoadamantane  $t = 16$  h (3),  $t = 0$  h (2) and click reaction (1) in  $\text{C}_6\text{D}_5\text{Br}$ .

### NMR analysis of 1-phenyl-1-propyne and 1-azidoadamantane reaction (Table 1, Entry 5)

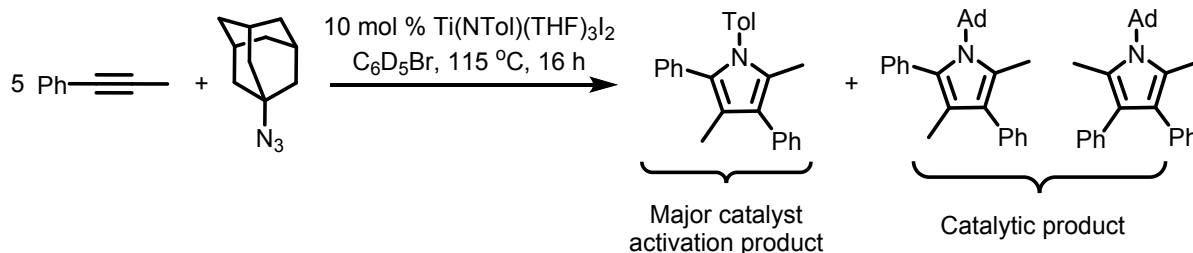

A standard catalytic run with 1-phenyl-1-propyne (125  $\mu\text{L}$ , 1.0 mmol, 5.0 equiv.) and 0.5 mL of stock solution (internal alkyne screen) was conducted. The catalytic mixture was analyzed directly without any further purification and the products were identified *in-situ* to give a mixture of products shown above and leftover starting materials.

### 2,4-dimethyl-3,5-diphenyl-1-adamantyl-1H-pyrrole

**$^1\text{H}$  NMR (500 MHz,  $\text{C}_6\text{D}_5\text{Br}$ ):**  $\delta$  2.55 (s, 3H, C(2)- $\text{CH}_3$ ), 2.17 (d,  $^3J_{\text{HH}} = 3.0$  Hz, 6H, N-C-( $\text{CH}_2$ ) $_3$ ), 1.77 (s, 3H, C(4)- $\text{CH}_3$ )

This is a partial line list, aromatic peaks and remaining adamantyl peaks are buried beneath starting materials or could not be determined

### 2,5-dimethyl-3,4-diphenyl-1-adamantyl-1H-pyrrole

**$^1\text{H}$  NMR (500 MHz,  $\text{C}_6\text{D}_5\text{Br}$ ):**  $\delta$  2.50 (s, 3H, C(2)- $\text{CH}_3$ ), 2.15 (d,  $^3J_{\text{HH}} = 3.0$  Hz, 6H, N-C-( $\text{CH}_2$ ) $_3$ ), 1.99 (s, 3H, C(5)- $\text{CH}_3$ )

This is a partial line list; aromatic peaks and remaining adamantyl peaks are buried beneath starting materials or could not be determined. NMR evidence suggests a breach in symmetry for this molecule. This could occur through arene interactions with solvent or hindered rotation of the adamantyl group.

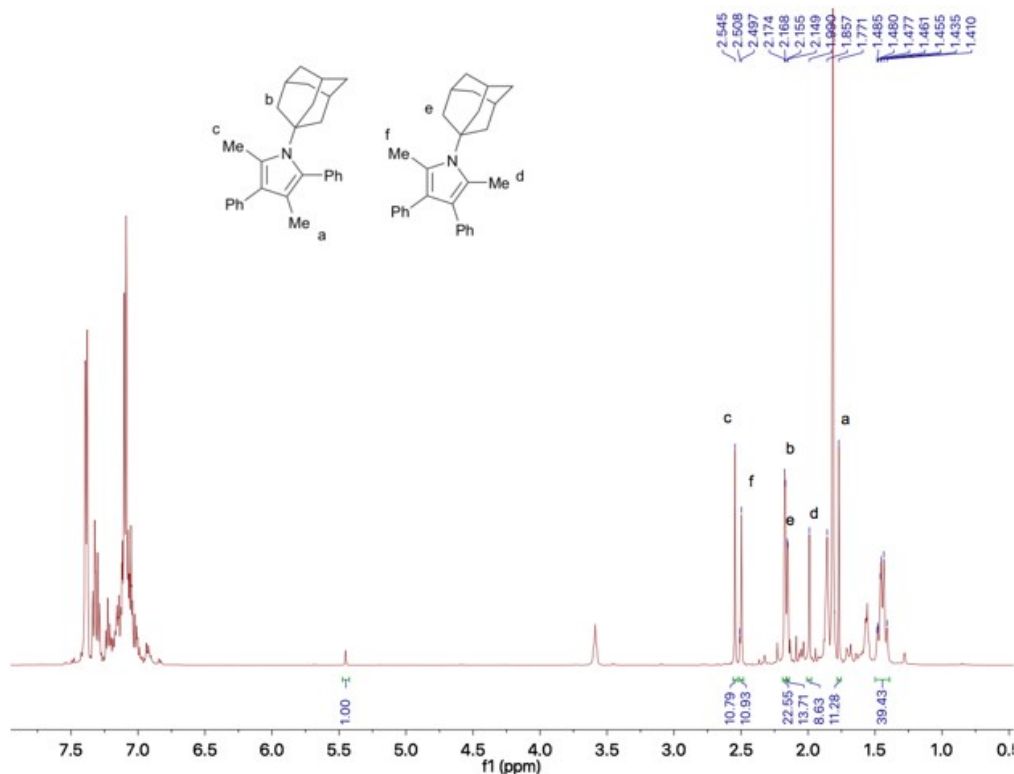

**Figure S68:**  $^1\text{H}$  spectrum of 1-phenyl-1-propyne reaction with 1-azidoadamantane in  $\text{C}_6\text{D}_5\text{Br}$ .

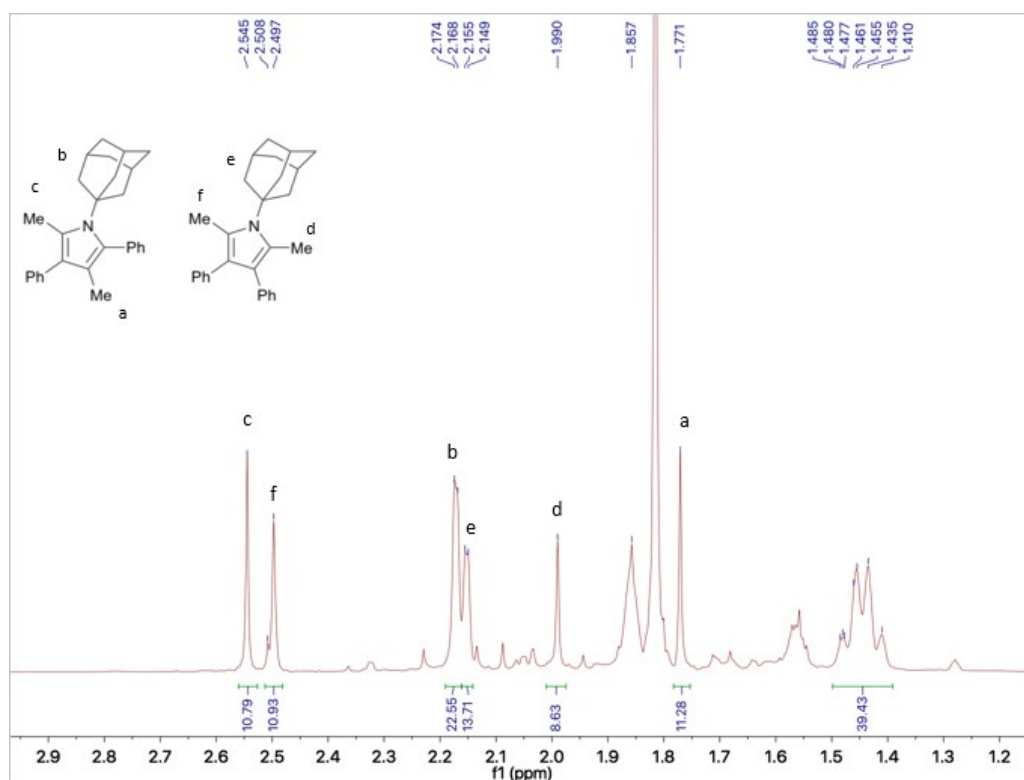

**Figure S69:** Zoom-in  $^1\text{H}$  spectrum of 1-phenyl-1-propyne reaction with 1-azidoadamantane in  $\text{C}_6\text{D}_5\text{Br}$ .

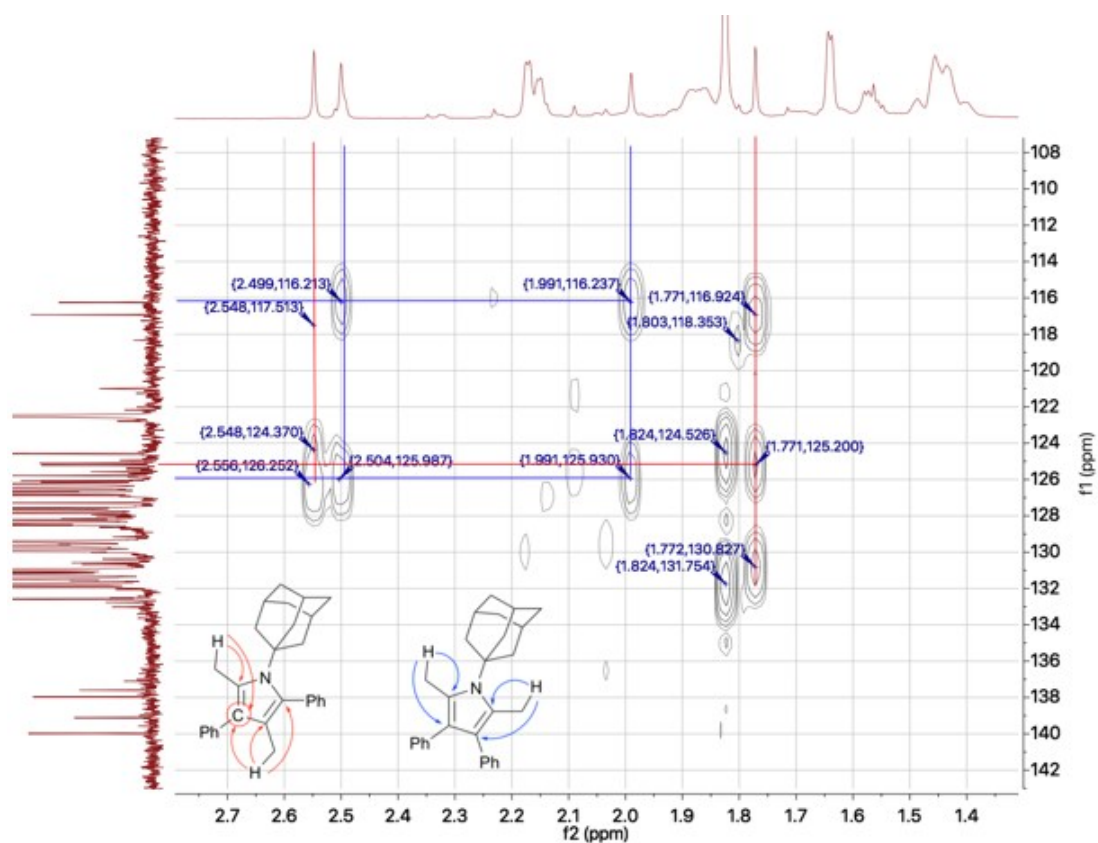

**Figure S70:**  $^1\text{H}$ - $^{13}\text{C}$  spectrum of 1-phenyl-1-propyne reaction with 1-azidoadamantane in  $\text{C}_6\text{D}_5\text{Br}$ .

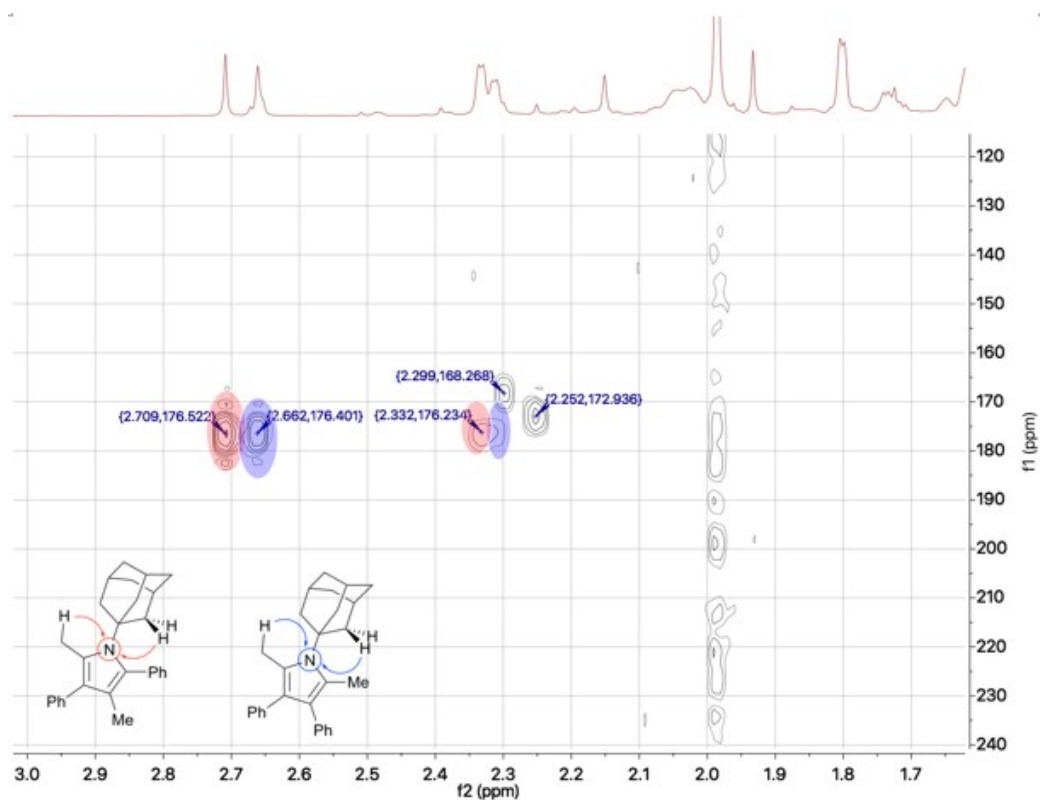

**Figure S71:**  $^1\text{H}$ - $^{15}\text{N}$  spectrum of 1-phenyl-1-propyne reaction with 1-azidoadamantane in  $\text{C}_6\text{D}_5\text{Br}$ .

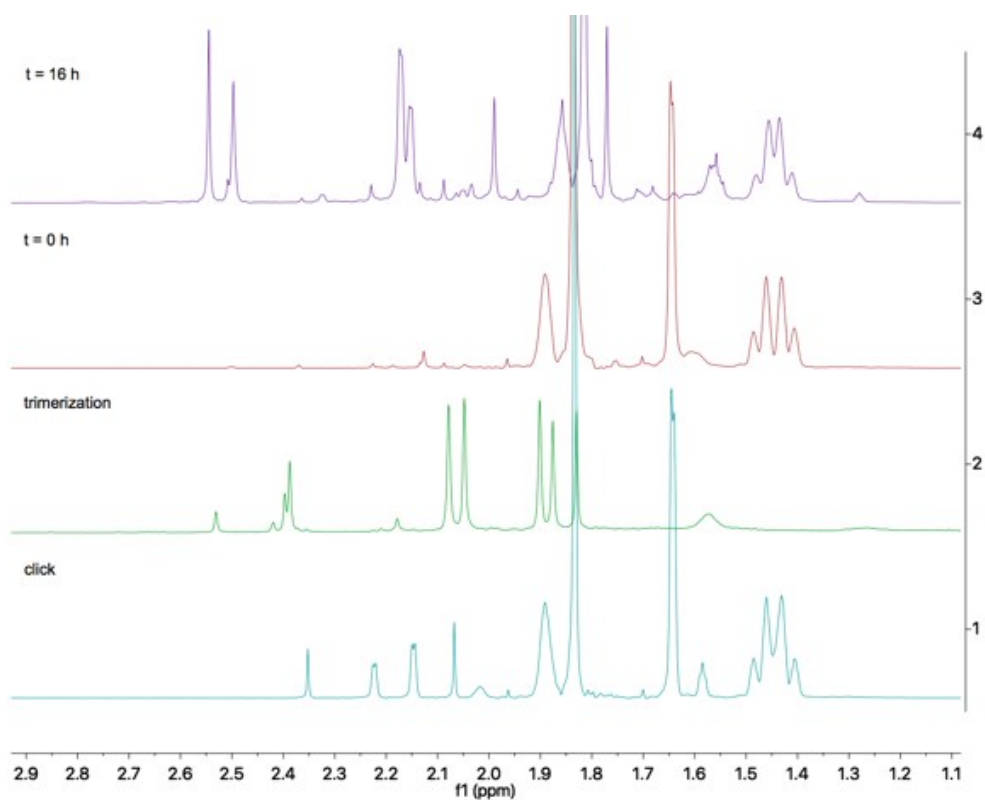

**Figure S72:** Zoom-in stacked  $^1\text{H}$  spectrum of 1-phenyl-1-propyne reaction with 1-azidoadamantane  $t = 16$  h (4),  $t = 0$  h (3), trimerization (2) and click reaction (1) in  $\text{C}_6\text{D}_5\text{Br}$ .

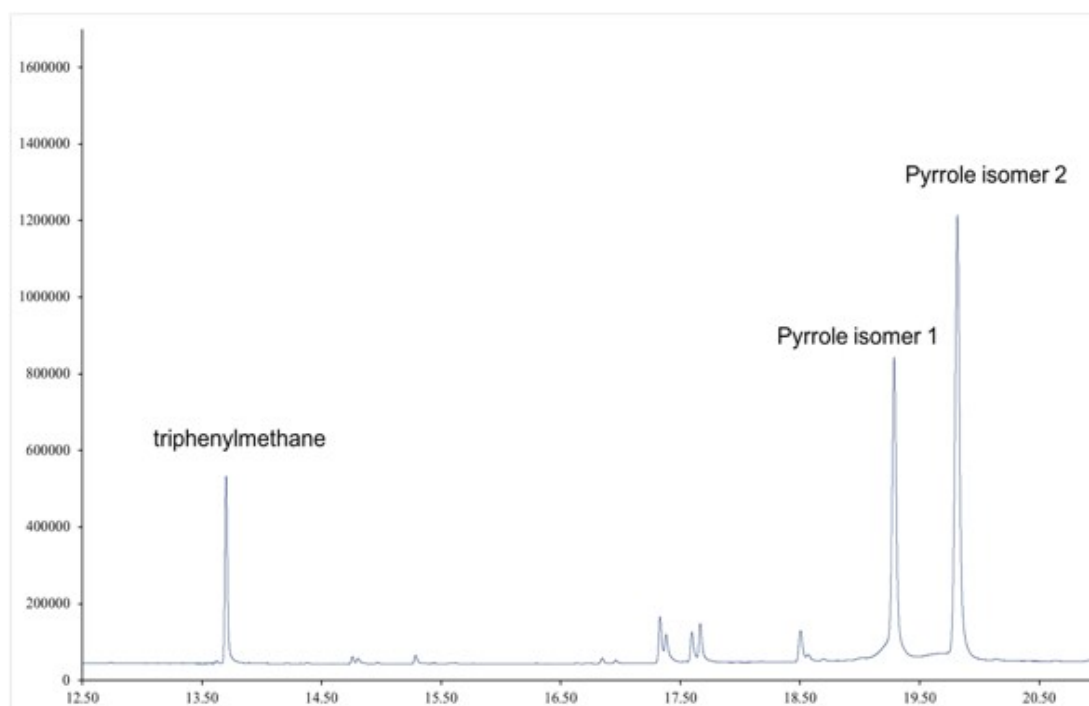

**Figure S73:** GC/FID trace of 1-phenyl-1-propyne reaction with 1-azidoadamantane in  $C_6D_5Br$ .

**NMR analysis of 1-azidodecane and 3-hexyne reaction (Table 1, Entry 9)**

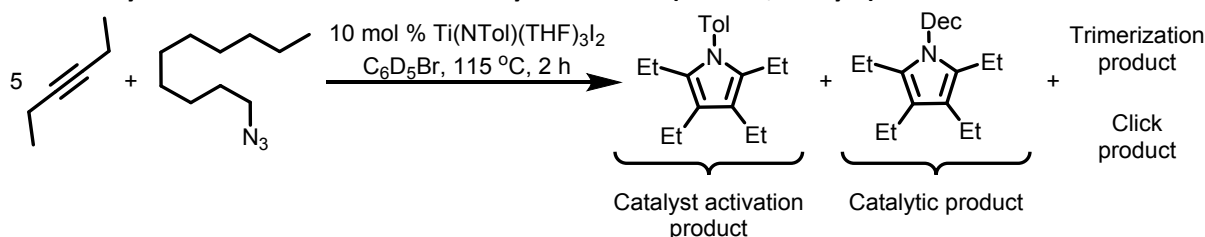

A standard catalytic run with [Ti] (6 mg, 0.01 mmol), 1-azidodecane (19 mg, 0.1 mmol, 1 equiv.) and 0.5 mL of stock solution (azide screen) was prepared and the reaction mixture was heated for 2 h. The catalytic mixture was analyzed directly without any further purification and the products were identified *in-situ* to give a mixture of products shown above and leftover starting materials.

**2,3,4,5-tetraethyl-1-decyl-1H-pyrrole (partial)**

$^1H$  NMR (400 MHz,  $C_6D_5Br$ ):  $\delta$  3.62 – 3.58 (m, 2H,  $H_3C(CH_2)_8-CH_2-N$ ), 2.51 (q,  $^3J_{HH} = 7.5$  Hz, 4H, *o*- $CH_2-CH_3$ ), 2.43 (q,  $^3J_{HH} = 7.5$  Hz, 4H, *m*- $CH_2-CH_3$ ), 0.88 (t,  $^3J_{HH} = 6.9$  Hz, 3H,  $H_3C-(CH_2)_9N$ )

The peak at  $\delta$  3.62 – 3.58 and 0.88 overlaps with THF from the catalyst and other alkyl impurities respectively. This is a partial NMR line list, the remaining peaks cannot be positively identified.

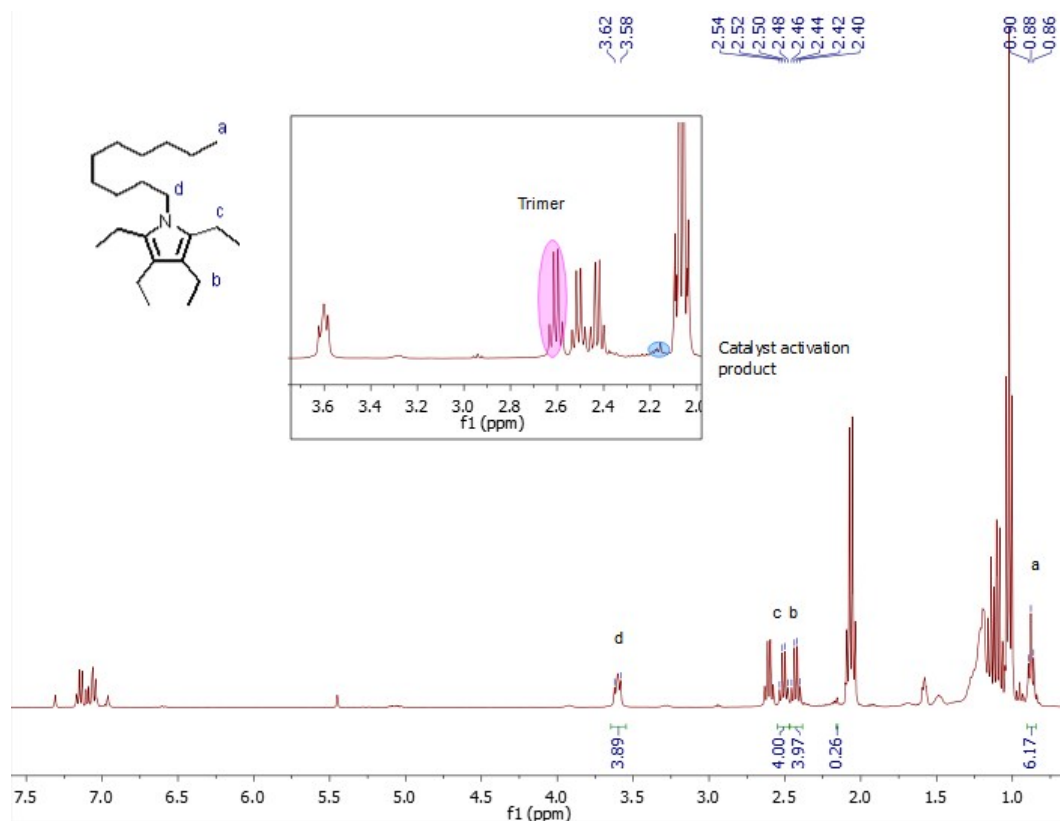

**Figure S74:**  $^1\text{H}$  spectrum of 1-azidodecane reaction with 3-hexyne in  $\text{C}_6\text{D}_5\text{Br}$ .

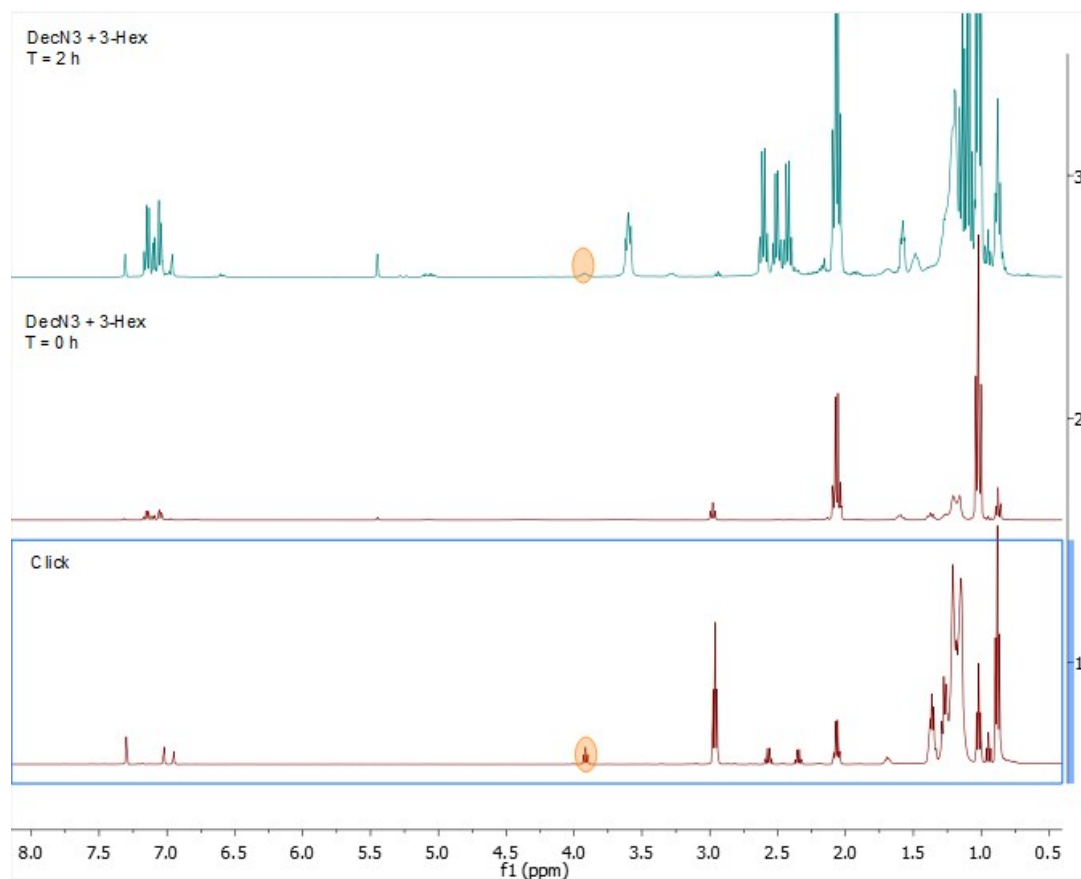

**Figure S75:** Stacked  $^1\text{H}$  spectrum of 1-azidodecane reaction with 3-hexyne t = 2 h (3), t = 0 h (2) and click reaction (1) in  $\text{C}_6\text{D}_5\text{Br}$ .

### Isolation of 2,3,4,5-tetraethyl-1-decyl-1H-pyrrole

To a 7 ml scintillation vial equipped with a stir-bar was added  $\text{Ti}(\text{NTol})_2(\text{THF})_3$  (35 mg, 0.056 mmol, 10 mol %), 1-azidodecane (103 mg, 0.57 mmol, 1 equiv.), 2.5 ml  $\text{C}_6\text{H}_5\text{Br}$  and 3-Hexyne (0.32 ml, 231 mg, 2.82 mmol, 5 equiv.) in the following order in a  $\text{N}_2$ -filled glovebox. The vial was then sealed and heated at 115 °C for 2 h. After which, the reaction mixture was transferred into a 20 ml scintillation vial and dried under *vacuo* while heated to 50 °C for several hours to give a black oil. The oil was taken up in minimal dichloromethane and purified over a silica column using an eluent of 3 % ethyl acetate / petroleum ether. The desired product elutes before the activation product (2,3,4,5-tetraethyl-1-tolyl-1H-pyrrole).

Two fractions were collected that contained the desired product with small amount of trimerisation and activation product present. (83 mg, 46 % corrected yield).

### 2,3,4,5-tetraethyl-1-decyl-1H-pyrrole

$^1\text{H}$  NMR (400 MHz,  $\text{CDCl}_3$ ):  $\delta$  3.69 (m, 2H,  $\text{N-CH}_2\text{-(CH}_2)_8\text{CH}_3$ ), 2.54 (q,  $^3J_{\text{HH}} = 7.5$  Hz, 4H,  $o\text{-N-pyr-CH}_2\text{CH}_3$ ), 2.40 (q,  $^3J_{\text{HH}} = 7.5$  Hz, 4H,  $m\text{-N-pyr-CH}_2\text{CH}_3$ ), 1.65 – 1.60 (m, 2H,  $\text{NCH}_2\text{-CH}_2\text{-(CH}_2)_7\text{CH}_3$ ), 1.33 – 1.27 (m, 14H,  $\text{N(CH}_2)_2\text{-(CH}_2)_7\text{-CH}_3$ ), 1.15 (t,  $^3J_{\text{HH}} = 7.5$  Hz, 6H,  $o\text{-N-pyr-CH}_2\text{CH}_3$ ), 1.11 (t,  $^3J_{\text{HH}} = 7.5$  Hz, 6H,  $o\text{-N-pyr-CH}_2\text{CH}_3$ ), 0.89 (t,  $^3J_{\text{HH}} = 7.5$  Hz, 3H,  $\text{N(CH}_2)_9\text{-CH}_3$ )

$^{13}\text{C}$  NMR (101 MHz,  $\text{CDCl}_3$ ):  $\delta$  128.1, 119.0, 43.7, 32.5, 32.0, 29.7, 29.5, 27.4, 22.8, 18.0, 17.9, 17.3, 16.1, 14.3.

GC-HRMS ( $m/z$ ): calcd. for  $\text{C}_{22}\text{H}_{35}\text{N}$ , 319.3239 ; found, 319.3247

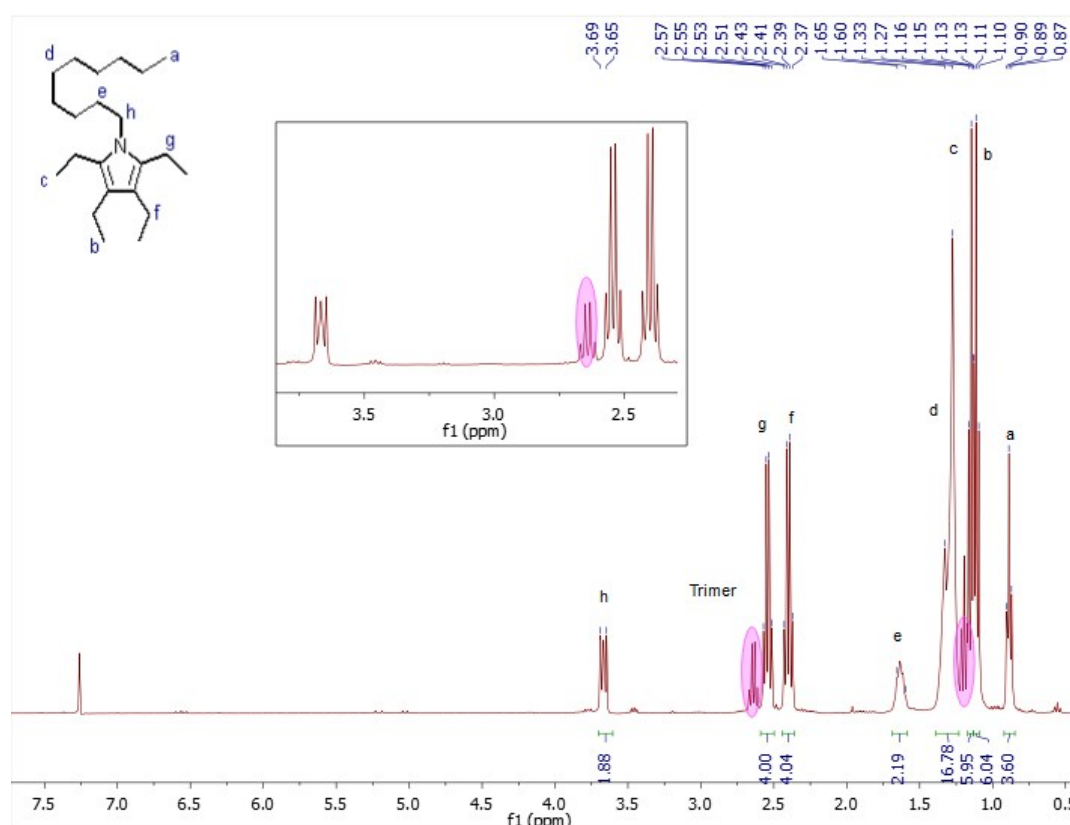

Figure S76:  $^1\text{H}$  spectrum of 2,3,4,5-tetraethyl-1-decyl-1H-pyrrole in  $\text{CDCl}_3$ .

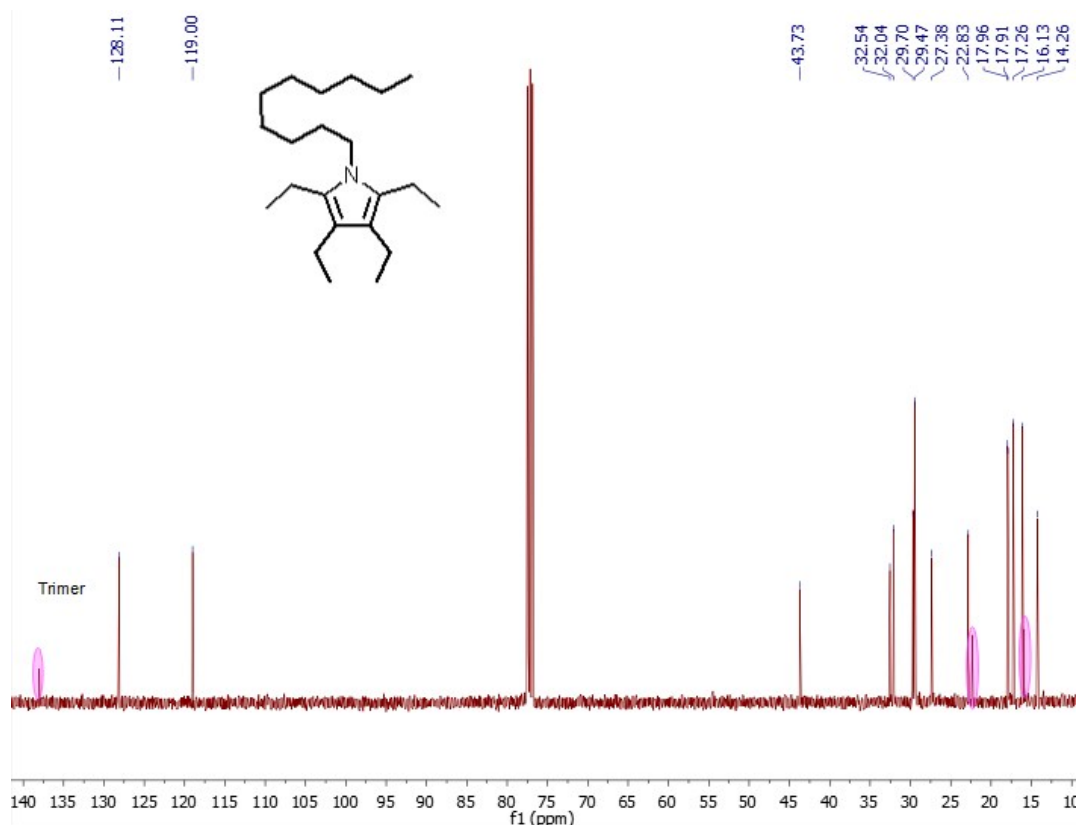

Figure S77:  $^{13}\text{C}$  spectrum of 2,3,4,5-tetraethyl-1-decyl-1H-pyrrole in  $\text{CDCl}_3$ .

#### NMR analysis of benzylazide and 3-hexyne reaction (Table 1, Entry 10)

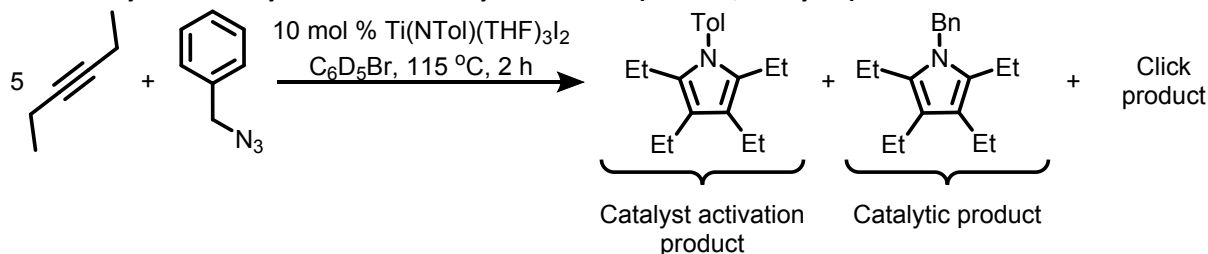

A standard catalytic run with  $[\text{Ti}]$  (7 mg, 0.01 mmol), benzylazide (13 mg, 0.1 mmol, 1 equiv.) and 0.5 mL of stock solution (azide screen) was prepared and the reaction mixture was heated for 2 h. The catalytic mixture was analyzed directly without any further purification and the products were identified *in-situ* to give a mixture of products shown above and leftover starting materials.

#### 2,3,4,5-tetraethyl-1-benzyl-1H-pyrrole

$^1\text{H}$  NMR (500 MHz,  $\text{C}_6\text{D}_5\text{Br}$ ):  $\delta$  6.76 (d,  $^3J_{\text{HH}} = 7.0 \text{ Hz}$ , 2H, *o*-Ar-H), 4.88 (s, 2H, Ar- $\text{CH}_2$ ), 2.44 (q,  $^3J_{\text{HH}} = 7.5 \text{ Hz}$ , 4H, pyr- $\text{CH}_2$ ), 2.36 (q,  $^3J_{\text{HH}} = 7.5 \text{ Hz}$ , 4H, pyr- $\text{CH}_2$ ), 1.15 (t,  $^3J_{\text{HH}} = 7.5 \text{ Hz}$ , 6H, pyr- $\text{CH}_2\text{-CH}_3$ ), 0.91 (t,  $^3J_{\text{HH}} = 7.5 \text{ Hz}$ , 6H, pyr- $\text{CH}_2\text{-CH}_3$ ).

Remaining aromatic peaks are hidden behind the internal standard or starting material.



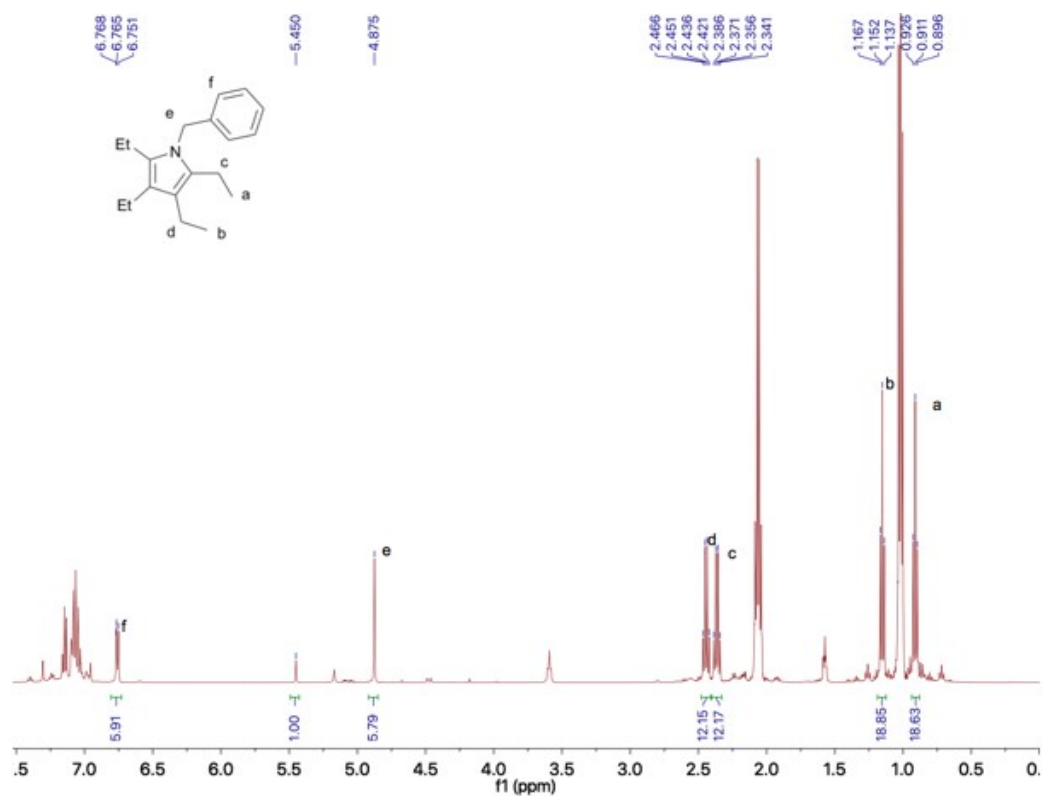

**Figure S78:**  $^1\text{H}$  spectrum of benzylazide reaction with 3-hexyne in  $\text{C}_6\text{D}_5\text{Br}$ .

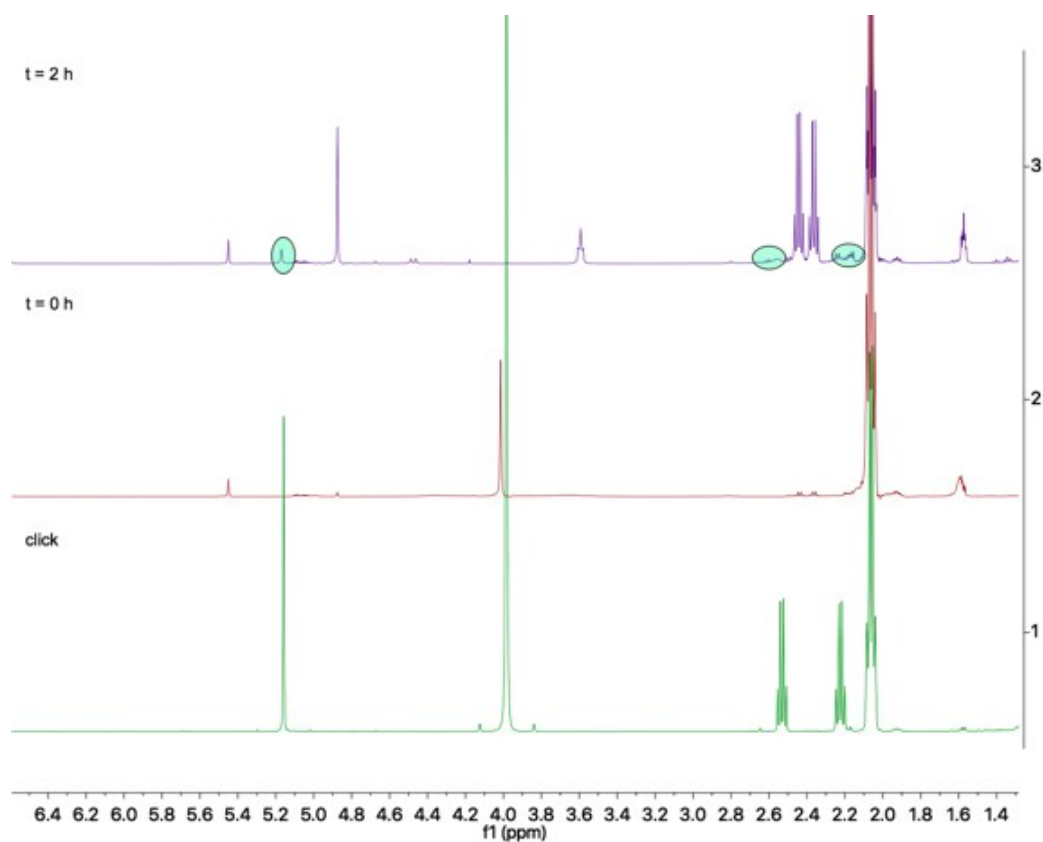

**Figure S79:** Zoom-in stacked  $^1\text{H}$  spectrum of benzylazide reaction with 3-hexyne  $t = 2\text{ h}$  (3),  $t = 0\text{ h}$  (2), and click reaction (1) in  $\text{C}_6\text{D}_5\text{Br}$ .

\* Click products highlighted in green

### Isolation of 2,3,4,5-tetraethyl-1-benzyl-1H-pyrrole

To a 20 mL vial equipped with a magnetic stir bar, Ti(NTol)(THF)<sub>3</sub>I<sub>2</sub> (37 mg, 0.059 mmol, 10 mol %) and benzyl azide (79 mg, 0.59 mmol, 1 equiv.) were dissolved in 2 mL of bromobenzene. To this solution was added 3-hexyne (350  $\mu$ L, 3.1 mmol, 5.2 equiv.) and the vial was sealed with a teflon cap, removed from the glovebox, and heated at 115°C for 2 hours. The vial was allowed to cool to 40°C, at which point the cap was removed under air and the volatiles were removed *in vacuo*. This residue was purified by column chromatography (SiO<sub>2</sub>, Hexanes:EtOAc 19:1 R<sub>f</sub> = 0.5) to give the title compound (76 mg, 59% yield).

### 2,3,4,5-tetraethyl-1-benzyl-1H-pyrrole

**<sup>1</sup>H NMR (400 MHz, CDCl<sub>3</sub>):**  $\delta$  7.26 (t, <sup>3</sup>J<sub>HH</sub> = 7.4 Hz, 2H, *m*-Ar-*H*), 7.19 (t, <sup>3</sup>J<sub>HH</sub> = 7.6 Hz, 1H, *p*-Ar-*H*), 6.84 (d, <sup>3</sup>J<sub>HH</sub> = 6.8 Hz, 2H, *o*-Ar-*H*), 5.01 (s, 2H, Ar-CH<sub>2</sub>), 2.44 (q, <sup>3</sup>J<sub>HH</sub> = 7.6 Hz, 4H, pyr-CH<sub>2</sub>-CH<sub>3</sub>), 2.43 (q, <sup>3</sup>J<sub>HH</sub> = 7.6 Hz, 4H, pyr-CH<sub>2</sub>-CH<sub>3</sub>), 1.13 (t, <sup>3</sup>J<sub>HH</sub> = 7.4 Hz, 3H, pyr-CH<sub>2</sub>-CH<sub>3</sub>), 0.97 (t, <sup>3</sup>J<sub>HH</sub> = 7.6 Hz, 3H, pyr-CH<sub>2</sub>-CH<sub>3</sub>).

**<sup>13</sup>C NMR (101 MHz, CDCl<sub>3</sub>):**  $\delta$  140.2, 128.8, 128.6, 126.8, 125.8, 119.6, 46.6, 18.0, 17.9, 17.4, 16.0.

**GC-HRMS (m/z):** calcd. for C<sub>19</sub>H<sub>27</sub>N, 269.2143 ; found, 269.2148

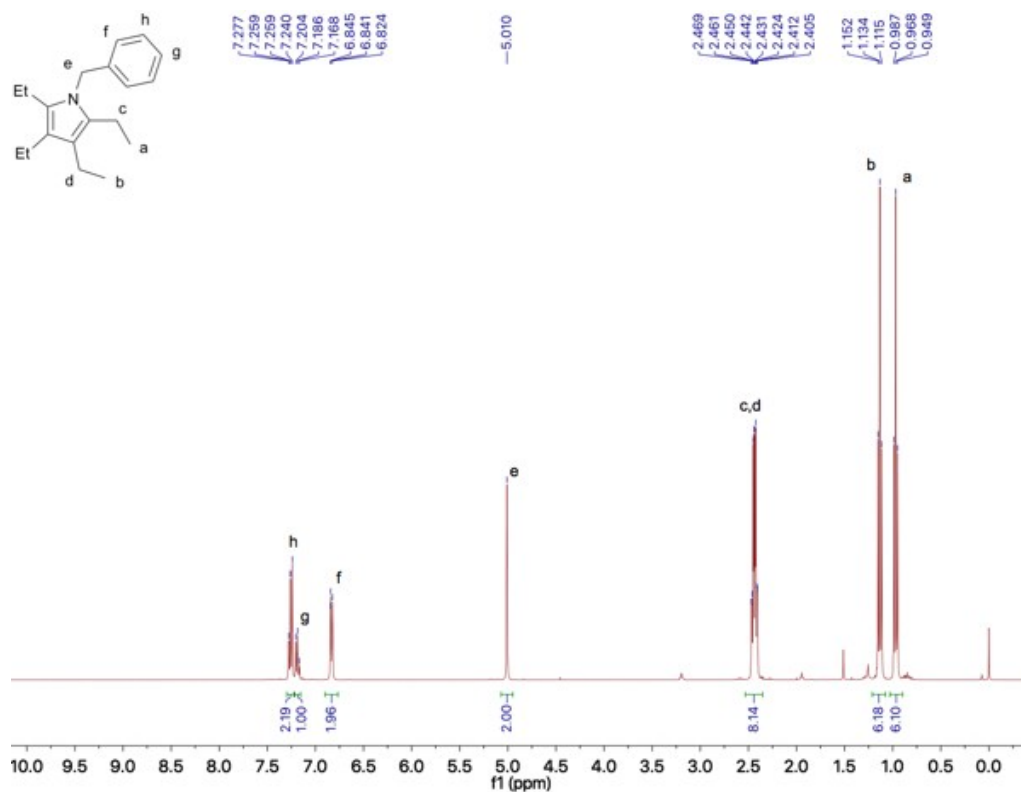

**Figure S80:** <sup>1</sup>H spectrum of 2,3,4,5-tetraethyl-1-benzyl-1H-pyrrole in CDCl<sub>3</sub>.

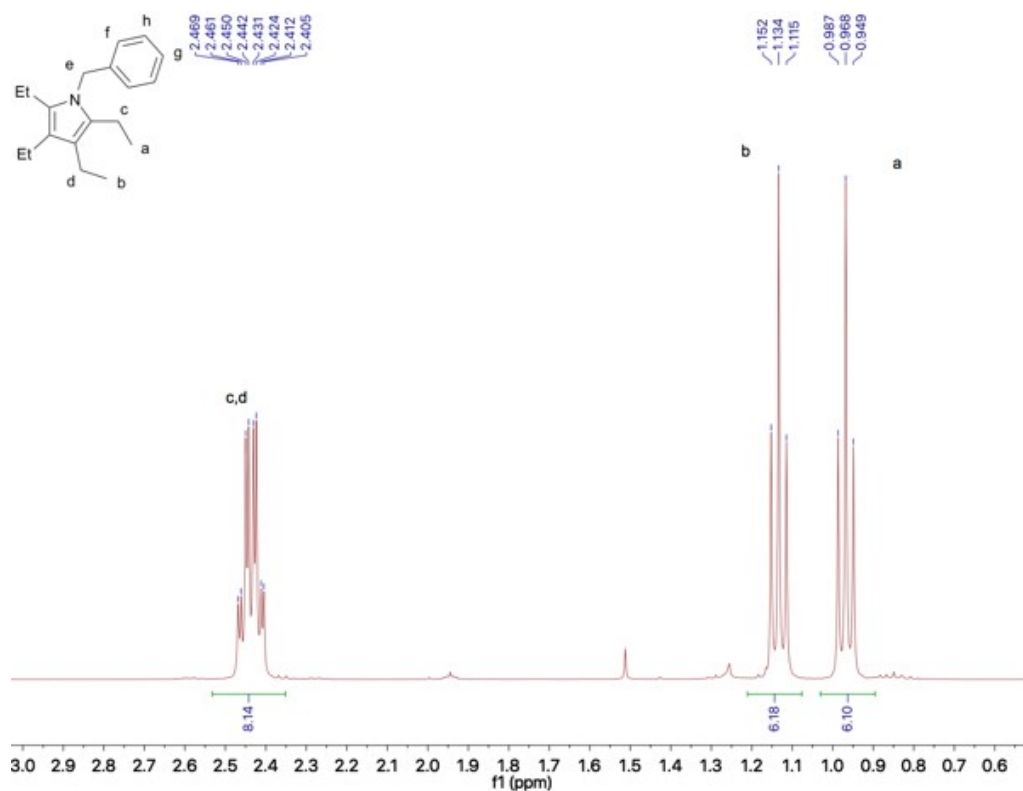

**Figure S81:** Zoom-in <sup>1</sup>H spectrum of 2,3,4,5-tetraethyl-1-benzyl-1H-pyrrole in CDCl<sub>3</sub>.

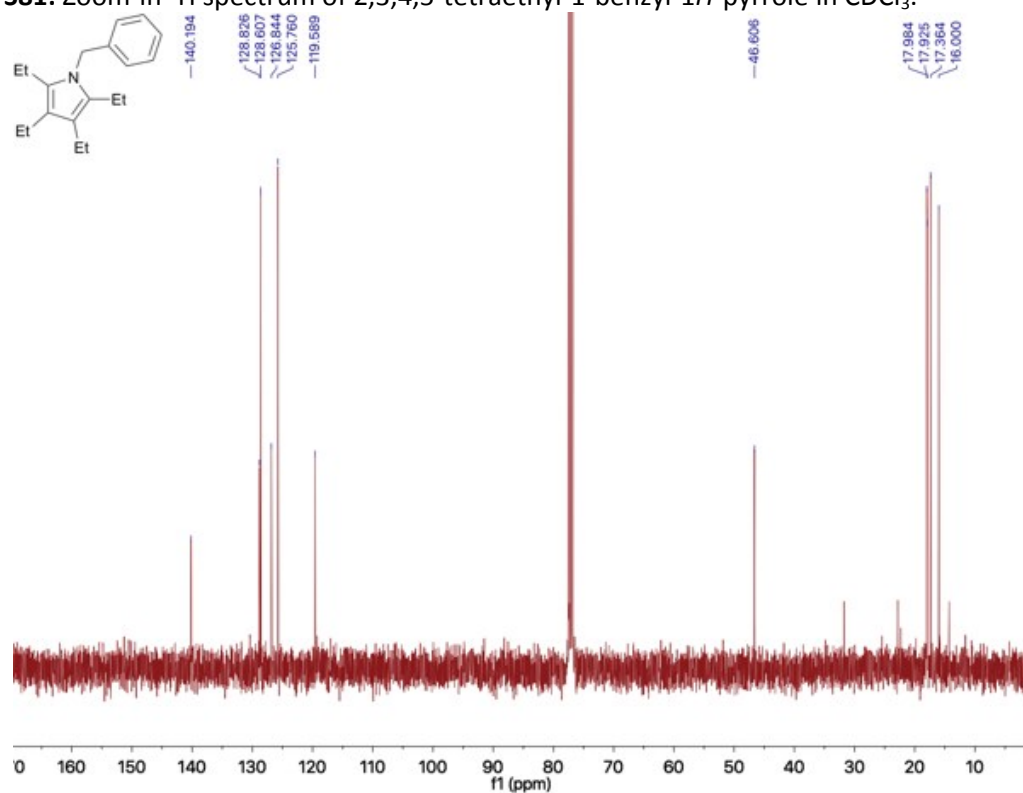

**Figure S82:** <sup>13</sup>C spectrum of 2,3,4,5-tetraethyl-1-benzyl-1H-pyrrole in CDCl<sub>3</sub>.

### NMR analysis of (*p*-tolyl)azide and 3-hexyne reaction (Table 1, Entry 11)

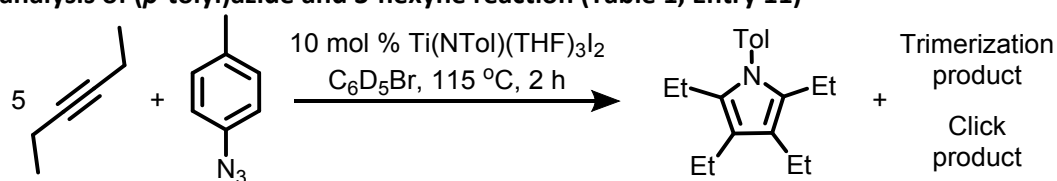

A standard catalytic run with [Ti] (7 mg, 0.01 mmol), (*p*-tolyl)azide (14 mg, 0.1 mmol, 1 equiv.) and 0.5 mL of stock solution (azide screen) was prepared and the reaction mixture was heated for 2 h. The catalytic mixture was analyzed directly without any further purification and the products were identified *in-situ* to give a mixture of products shown above and leftover starting materials.

Characterization of this pyrrole product was done previously.<sup>3</sup>

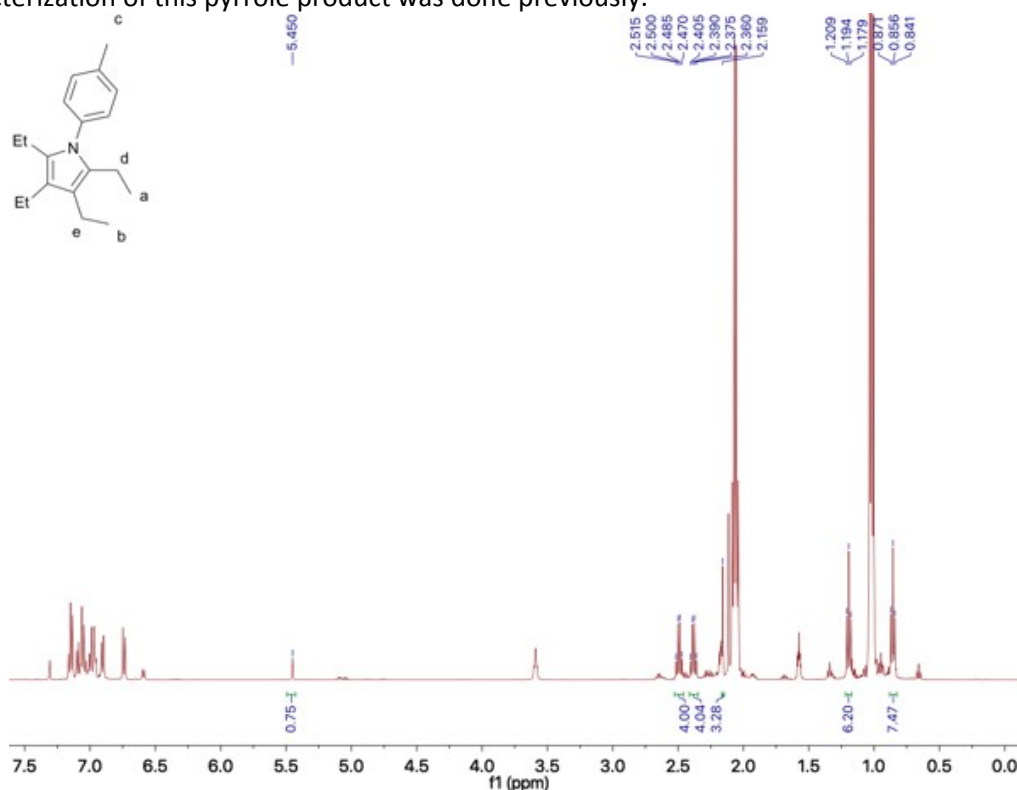

**Figure S83:** <sup>1</sup>H spectrum of (*p*-tolyl)azide reaction with 3-hexyne in  $\text{C}_6\text{D}_5\text{Br}$ .

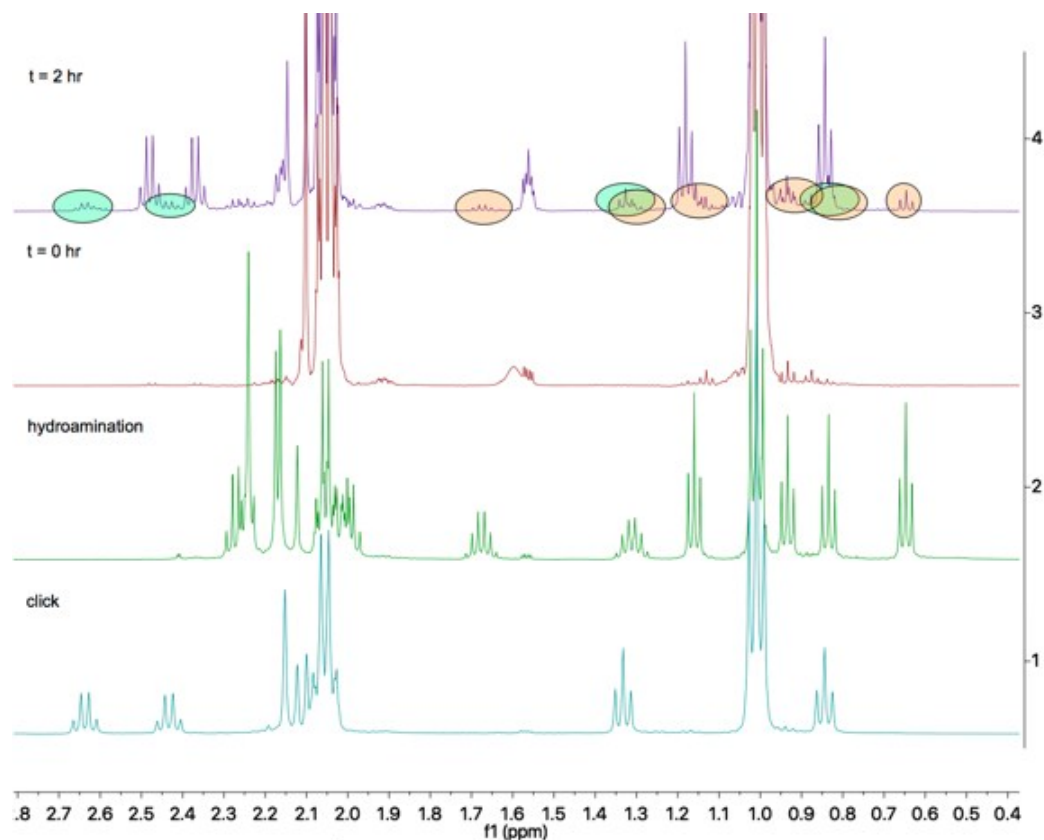

**Figure S84:** Zoom-in stacked  $^1\text{H}$  spectrum of (*p*-tolyl)azide reaction with 3-hexyne t = 2 h (4), t = 0 h (3), hydroamination of 3-hexyne with *p*-toluidine (2) and click reaction (1).

\* Triazole and hydroamination products are highlighted in green and orange, respectively.

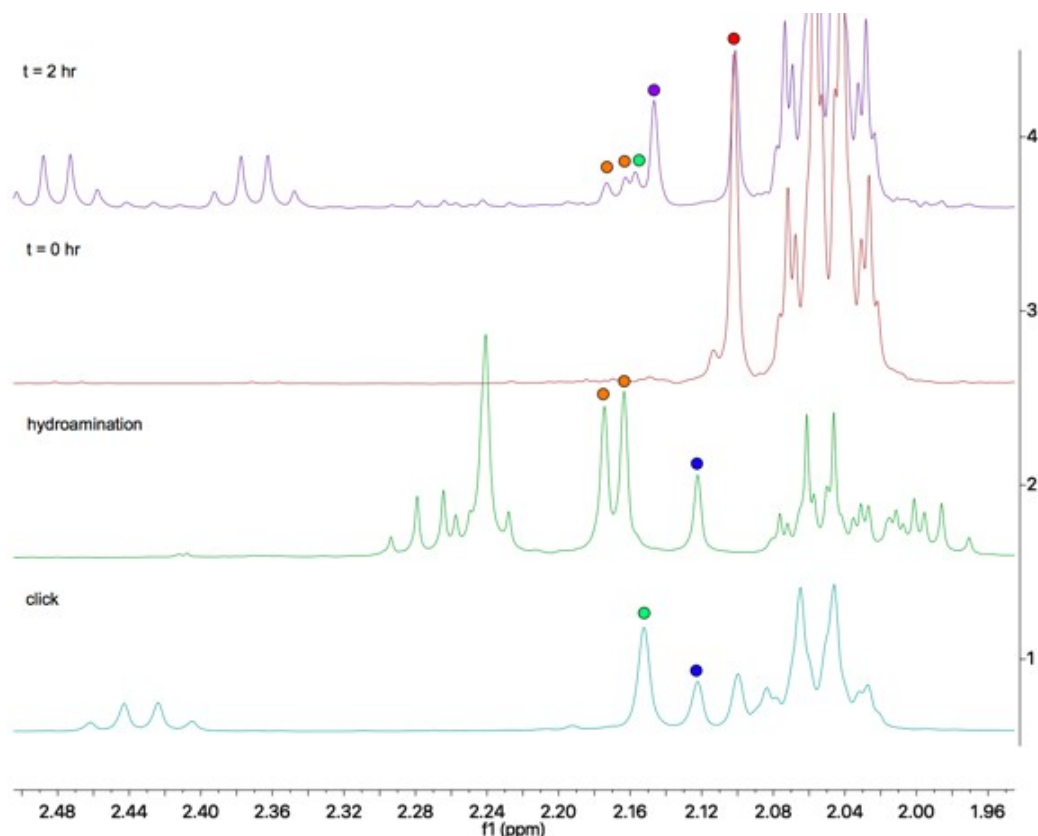

**Figure S85:** Zoom-in stacked  $^1\text{H}$  spectrum of (*p*-tolyl)azido reaction with 3-hexyne  $t = 2$  h (4),  $t = 0$  (3), hydroamination of 3-hexyne with *p*-toluidine (2) and click reaction (1).

\* The *p*-tolyl peaks from various groups are marked with colored dots (red = (*p*-tolyl)azido; blue = *p*-toluidine; purple = 2,3,4,5-tetraethyl-1-(*p*-tolyl)-1H-pyrrole; green = 4,5-diethyl-1-(*p*-tolyl)-1H-1,2,3-triazole; orange = N-(*p*-tolyl)hexan-3-imine (mixture of E and Z isomers)).

#### NMR analysis of (*p*-tolyl)azide and 3-hexyne reaction (Table 1, Entry 12)

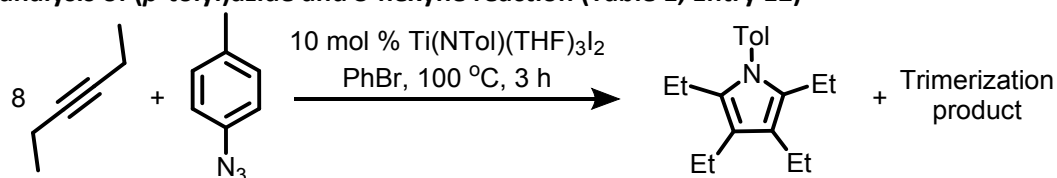

21.6 mg of  $\text{Ph}_3\text{CH}$  was dissolved in 2 mL of bromobenzene (0.044 M  $\text{Ph}_3\text{CH}$ ). 0.5 mL of this solution was then used to dissolve  $\text{Ti}(\text{NTol})(\text{THF})_3\text{I}_2$  (6 mg, 0.01 mmol, 10 mol %) and (*p*-tolyl)azide (13.6 mg, 0.102 mmol, 1 equiv.) that had been massed out in a screw-cap NMR tube. 3-hexyne (94  $\mu\text{L}$ , 0.83 mmol, 8.3 equiv) was subsequently added and the NMR tube was sealed and inverted to mix. The tube was heated at  $100^\circ\text{C}$  in an oil bath for 3 hours. The catalytic mixture was analyzed directly without any further purification and the products were identified *in situ* to give a mixture of products shown above and leftover starting materials.

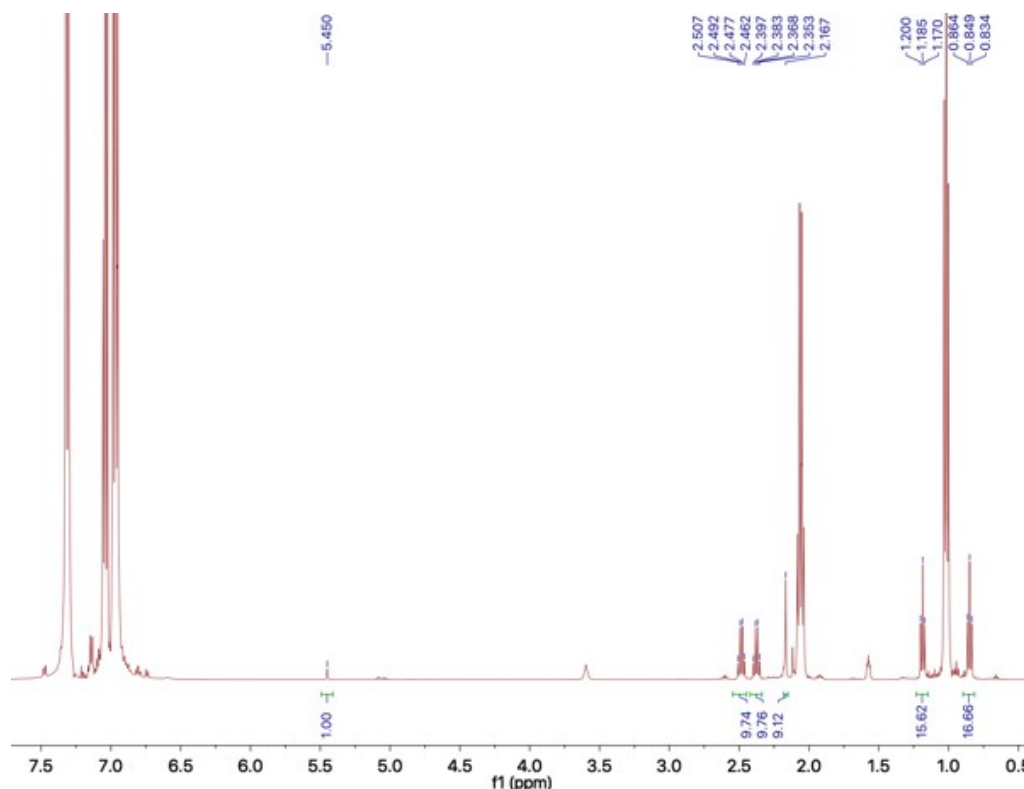

**Figure S86:** No-D NMR of (*p*-tolyl)azide reaction with 3-hexyne in PhBr.

**NMR analysis of azidomethyl phenyl sulfide and 3-hexyne reaction (Table 1, Entry 13)**

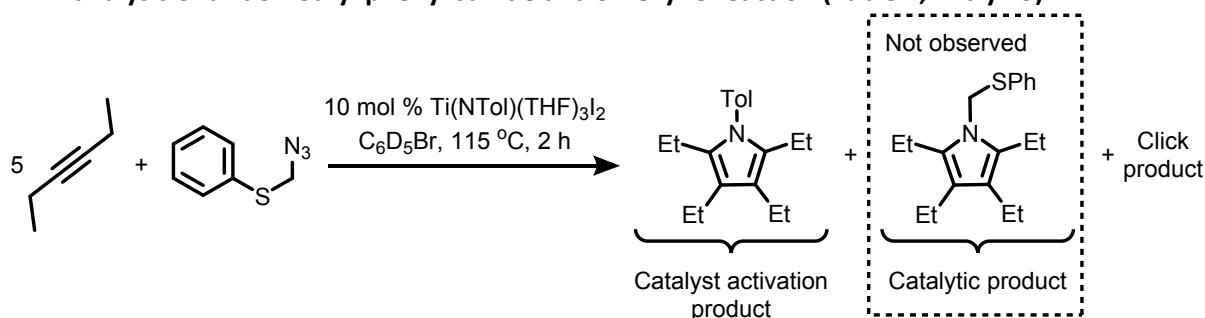

A standard catalytic run with [Ti] (6 mg, 0.01 mmol), azidomethyl phenyl sulfide (19 mg, 0.1 mmol, 1 equiv.) and 0.5 mL of stock solution (azide screen) was prepared and the reaction mixture was heated for 2 h. The catalytic mixture was analyzed directly without any further purification and the products were identified *in-situ* to give a mixture of products shown above and leftover starting materials. The catalytic product was not observed although we do observe some unexplainable quartets in the spectrum.

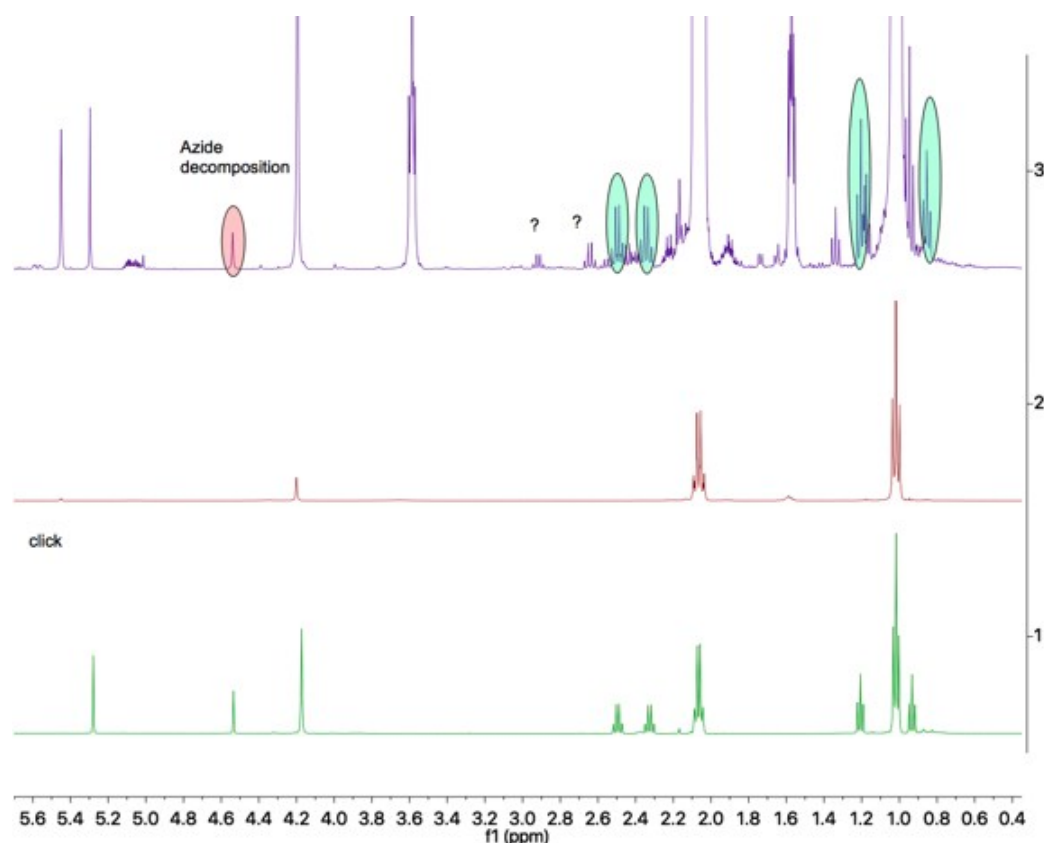

**Figure S87:** Stacked  $^1\text{H}$  spectrum of azidomethyl phenyl sulfide reaction with 3-hexyne  $t = 2$  h (3),  $t = 0$  h (2) and click reaction (1) in  $\text{C}_6\text{D}_5\text{Br}$ .

**NMR analysis of trityl azide and 3-hexyne reaction (Table 1, Entry 14)**

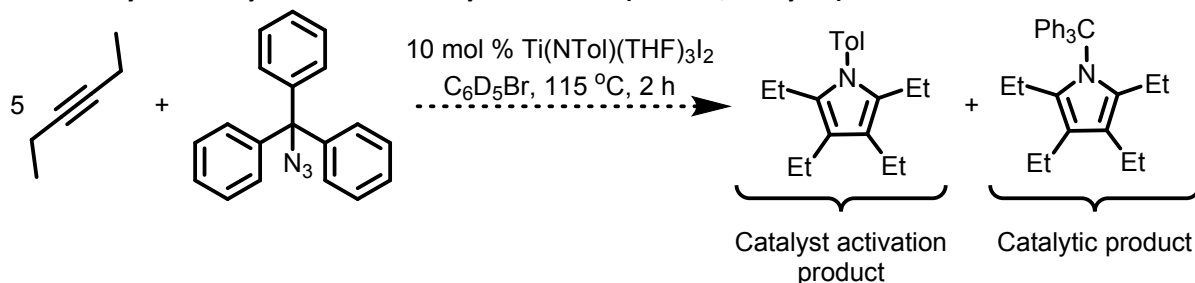

A standard catalytic run with [Ti] (6 mg, 0.01 mmol), trityl azide (30 mg, 0.1 mmol, 1 equiv.) and 0.5 mL of stock solution (azide screen) was prepared and the reaction mixture was heated for 2 h. The catalytic mixture was analyzed directly without any further purification and were identified *in-situ* to not contain the desired products. Poor mass balances were also observed for both starting reagents.



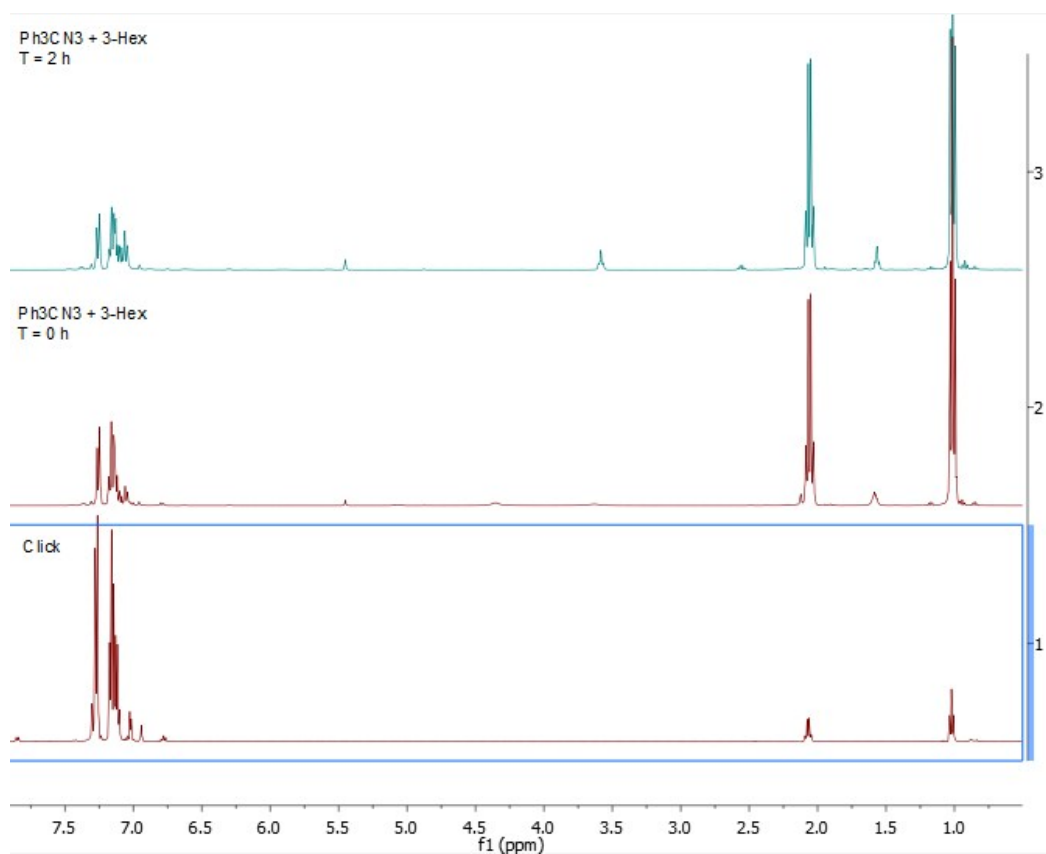

**Figure S88:** Stacked  $^1\text{H}$  spectrum of tritylazide reaction with 3-hexyne  $t = 2$  h (3),  $t = 0$  h (2) and click reaction (1) in  $\text{C}_6\text{D}_5\text{Br}$ .

**Table S1:** Internal alkyne scope triazole yield, trimer yield and mass balance data

| <b>Table 1,<br/>Entry #</b> | <b>Azide</b>                    | <b>Alkyne</b>                       | <b>Triazole<br/>yield (%)<sup>6</sup></b> | <b>Trimer yield<br/>(%)<sup>8</sup> 9</b> | <b>Azide mass<br/>balance (%)</b> | <b>Alkyne mass<br/>balance (%)</b> |
|-----------------------------|---------------------------------|-------------------------------------|-------------------------------------------|-------------------------------------------|-----------------------------------|------------------------------------|
| <b>1<sup>a</sup></b>        | Ad<br><b>1b</b>                 | 3-Hexyne<br><b>2a</b>               | 0                                         | 45                                        | 80                                | 84                                 |
| <b>2<sup>b</sup></b>        | Ad<br><b>1b</b>                 | 3-Hexyne<br><b>2a</b>               | 0                                         | 1                                         | 85                                | 89                                 |
| <b>3<sup>a</sup></b>        | Ad<br><b>1b</b>                 | 2-butyne<br><b>2b</b>               | 0                                         | 2                                         | 71                                | 90                                 |
| <b>4<sup>a</sup></b>        | Ad<br><b>1b</b>                 | Diphenyl-<br>acetylene<br><b>2c</b> | 0                                         | 0                                         | *                                 | *                                  |
| <b>5<sup>a</sup></b>        | Ad<br><b>1b</b>                 | Phenyl<br>propyne<br><b>2d</b>      | 0                                         | 0                                         | *                                 | 92                                 |
| <b>6<sup>d</sup></b>        | <i>n</i> -Dec<br><b>1c</b>      | 3-Hexyne<br><b>2a</b>               |                                           | -                                         |                                   |                                    |
| <b>7<sup>e</sup></b>        | <i>n</i> -Dec<br><b>1c</b>      | 3-Hexyne<br><b>2a</b>               |                                           | -                                         |                                   |                                    |
| <b>8<sup>b</sup></b>        | <i>n</i> -Dec<br><b>1c</b>      | 3-Hexyne<br><b>2a</b>               |                                           | -                                         |                                   |                                    |
| <b>9<sup>b</sup></b>        | <i>n</i> -Dec<br><b>1c</b>      | 3-Hexyne<br><b>2a</b>               | 7                                         | 6                                         | 74                                | 95                                 |
| <b>10<sup>b</sup></b>       | Bn<br><b>1d</b>                 | 3-Hexyne<br><b>2a</b>               | 11                                        | 0                                         | 70                                | 89                                 |
| <b>11<sup>b</sup></b>       | Tol<br><b>1a</b>                | 3-Hexyne<br><b>2a</b>               | 10                                        | 0                                         | 82                                | 92                                 |
| <b>12<sup>f</sup></b>       | Tol<br><b>1a</b>                | 3-Hexyne<br><b>2a</b>               |                                           | -                                         |                                   |                                    |
| <b>13<sup>b</sup></b>       | PhSCH <sub>2</sub><br><b>1e</b> | 3-Hexyne<br><b>2a</b>               | 0                                         | 0                                         | 65                                | 96                                 |
| <b>14<sup>b</sup></b>       | Ph <sub>3</sub> C<br><b>1f</b>  | 3-Hexyne<br><b>2a</b>               | 0                                         | 0                                         | 44                                | 53                                 |

<sup>a</sup>Conditions: 0.2 mmol 1b (1 equiv.), 2 (5 equiv.), 10 mol % (THF)<sub>3</sub>TiI<sub>2</sub>(Ntol) 115°C, 0.5 mL C<sub>6</sub>D<sub>5</sub>Br, average of 2 runs. <sup>b</sup>Conditions: 0.1 mmol 1 (1 equiv.), 2a (x equiv.), 10 mol % (THF)<sub>3</sub>TiI<sub>2</sub>(Ntol) 115°C, 0.5 mL C<sub>6</sub>D<sub>5</sub>Br, average of 2-3 runs. <sup>d</sup>Conducted at 80°C. <sup>e</sup>Conducted at 100°C.

<sup>f</sup>Conditions: 0.1 mmol 1a (1 equiv.), 0.8 mmol 2 (8 equiv.), 10 mol % (THF)<sub>3</sub>I<sub>2</sub>Ti(Ntol), 115°C, 0.5 mL C<sub>6</sub>D<sub>5</sub>Br, single run. <sup>8</sup>Trimer yields are calculated with respect to alkyne. \* Overlap of peaks in NMR spectra makes positive identification difficult. - Data unavailable in non-quantitative NMR

**Table S2:** 1-azidodecane optimisation conditions with 3-hexyne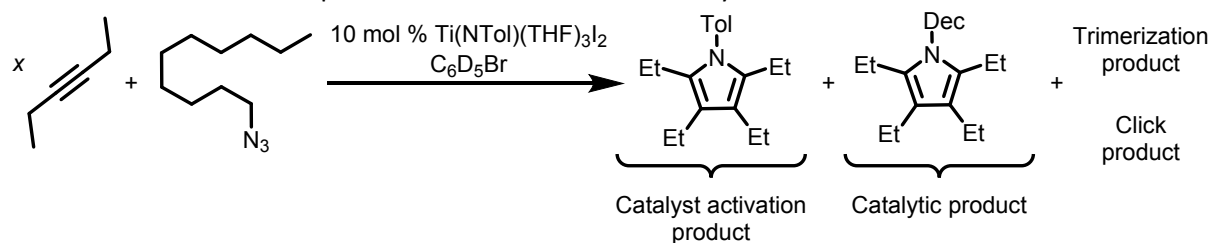

| Entry # | 3-hexyne equiv. ( $x$ ) | time (h) | Temp ( $^{\circ}\text{C}$ ) | Catalytic pyrrole yield (%) <b>3</b> |
|---------|-------------------------|----------|-----------------------------|--------------------------------------|
| 1       | 3                       | 6        | 80                          | 37                                   |
| 2       | 3                       | 6        | 100                         | 35                                   |
| 3       | 3                       | 6        | 115                         | 34                                   |
| 4       | 0.5                     | 3        | 115                         | 5                                    |
| 5       | 4.5                     | 3        | 115                         | 45                                   |
| 6       | 8                       | 3        | 115                         | 74                                   |

Conditions: 0.1 mmol 1c (1 equiv.), 2a ( $x$  equiv.), 10 mol %  $(\text{THF})_3\text{TiI}_2(\text{Ntol})$ , 0.5 mL  $\text{C}_6\text{D}_5\text{Br}$ , single run

## NMR analysis of catalytic reactions with terminal alkyne substrates (Table 2)

### NMR analysis of 1-hexyne and 1-azidoadamantane reaction (Table 2, Entry 1)

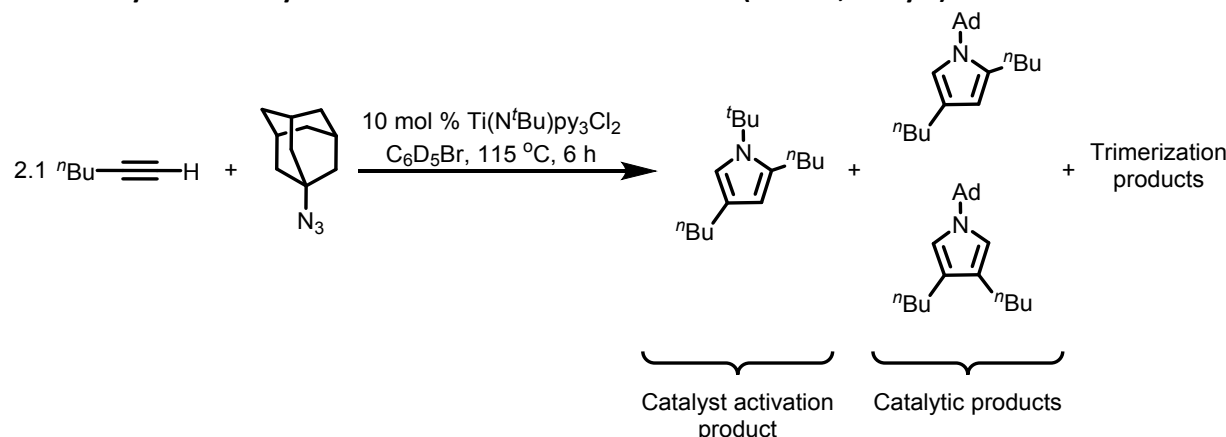

A standard catalytic run with 1-hexyne (48.5  $\mu\text{L}$ , 0.42 mmol, 2.1 equiv.), 1-azidoadamantane (35 mg, 0.2 mmol, 1.0 equiv.) and 0.5 mL of stock solution (terminal alkyne screen) was conducted. The catalytic mixture was analyzed directly without any further purification and the products were identified *in-situ* to give a mixture of products shown above and leftover 1-azidoadamantane.

#### 2,4-di-*n*-butyl-1-(adamantyl)-1H-pyrrole (partial)

$^1\text{H}$  NMR (400 MHz,  $\text{C}_6\text{D}_5\text{Br}$ ):  $\delta$  6.58 (app m, 1H, *o*-N-pyr-*H*), 5.96 (s, 1H, *m*-N-pyr-*H*), 2.82 – 2.78 (m, 2H, *o*- $\text{CH}_2\text{CH}_2\text{CH}_2\text{CH}_3$ ), 2.54 – 2.50 (m, 2H, *m*- $\text{CH}_2\text{CH}_2\text{CH}_2\text{CH}_3$ ), 2.07 (s, 6H, Ad- $\text{CH}_2$ ), 1.99 (s, 3H, Ad-*CH*), 1.57 (s, 6H, Ad- $\text{CH}_2$ )

This is a partial NMR line list, the remaining *n*-butyl peaks are hidden under other peaks.

#### 3,4-di-*n*-butyl-1-(adamantyl)-1H-pyrrole (partial)

$^1\text{H}$  NMR (400 MHz,  $\text{C}_6\text{D}_5\text{Br}$ ):  $\delta$  6.58 (app m, 2H, *o*-N-pyr-*H*), 2.70 – 2.66 (m, 2H, *m*- $\text{CH}_2\text{CH}_2\text{CH}_2\text{CH}_3$ )

This is a partial NMR line list, the remaining adamantyl and *n*-butyl peaks are hidden under other peaks.

The pyr-*H* peak for both regioisomers overlap at  $\delta$  6.58 ppm in  $\text{C}_6\text{D}_5\text{Br}$ . In  $\text{CDCl}_3$ , the peaks appear as two overlapping peaks that correlate to two N peaks in  $^{15}\text{N}$ - $^1\text{H}$  HMBC. To obtain the spectra in  $\text{CDCl}_3$ , the catalytic reaction was ran as described above in the absence of internal standard ( $\text{Ph}_3\text{CH}$ ). Following which, the reaction was dried under *vacuo* and retaken up in  $\text{CDCl}_3$  without any further purification.

#### 2,4-di-*n*-butyl-1-(adamantyl)-1H-pyrrole (partial)

$^1\text{H}$  NMR (400 MHz,  $\text{CDCl}_3$ ):  $\delta$  6.60 (app m, 1H, *o*-N-pyr-*H*), 5.89 (s, 1H, *m*-N-pyr-*H*), 2.85 – 2.81 (m, 2H, *o*- $\text{CH}_2\text{CH}_2\text{CH}_2\text{CH}_3$ ), 2.24 (m, 9H, Ad- $\text{CH}_2$  and Ad-*CH*), 1.77 (s, 6H, Ad- $\text{CH}_2$ )

One of the activation peak is buried under the  $\delta$  5.89 peak. This is a partial NMR line list, the remaining *n*-butyl peaks are hidden under other peaks.

#### 3,4-di-*n*-butyl-1-(adamantyl)-1H-pyrrole (partial)

$^1\text{H}$  NMR (400 MHz,  $\text{CDCl}_3$ ):  $\delta$  6.61 (app m, 2H, *o*-N-pyr-*H*), 2.79 – 2.75 (m, 2H, *m*- $\text{CH}_2\text{CH}_2\text{CH}_2\text{CH}_3$ )

This is a partial NMR line list, the remaining adamantyl and *n*-butyl peaks are hidden under other peaks.

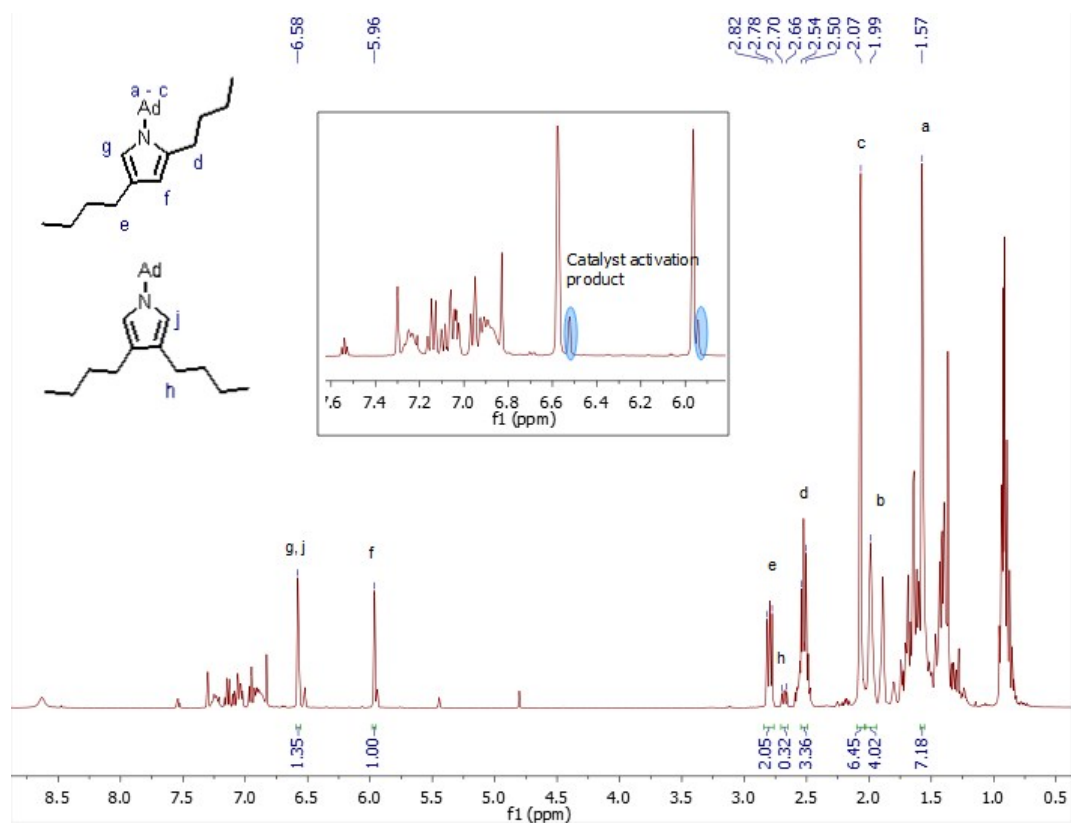

Figure S89:  $^1\text{H}$  spectrum of 1-hexyne reaction with 1-azidoadamantane in  $\text{C}_6\text{D}_5\text{Br}$ .

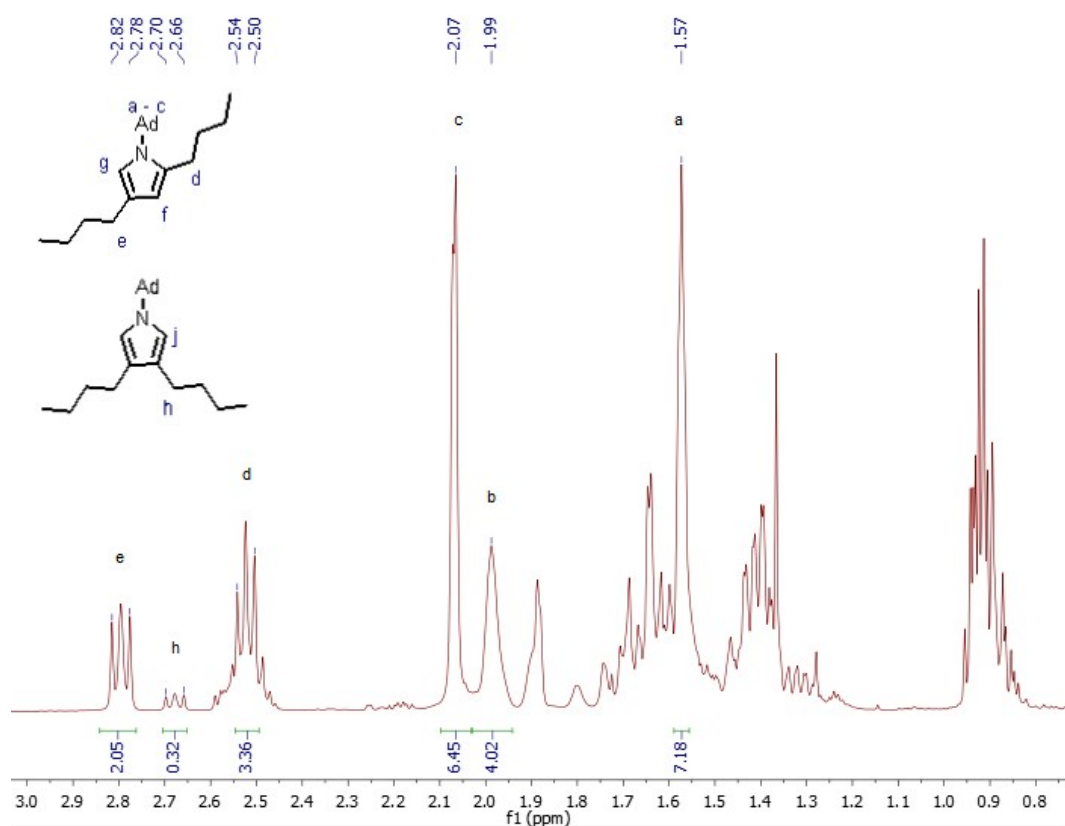

Figure S90: Zoom-in  $^1\text{H}$  spectrum of 1-hexyne reaction with 1-azidoadamantane in  $\text{C}_6\text{D}_5\text{Br}$ .

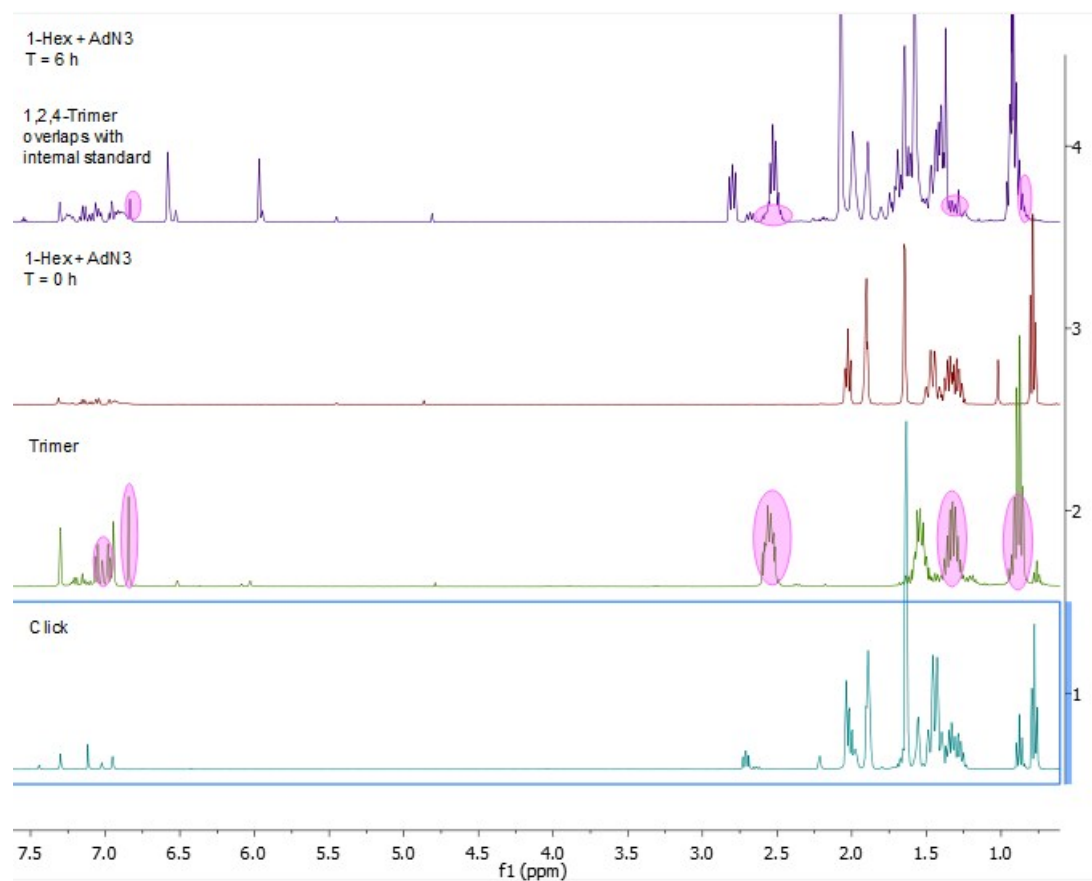

**Figure S91:** Stacked  $^1\text{H}$  spectrum of 1-hexyne reaction with 1-azidoadamantane  $t = 6$  h (4),  $t = 0$  h (3), trimerization reaction (2) and click reaction (1) in  $\text{C}_6\text{D}_5\text{Br}$ .

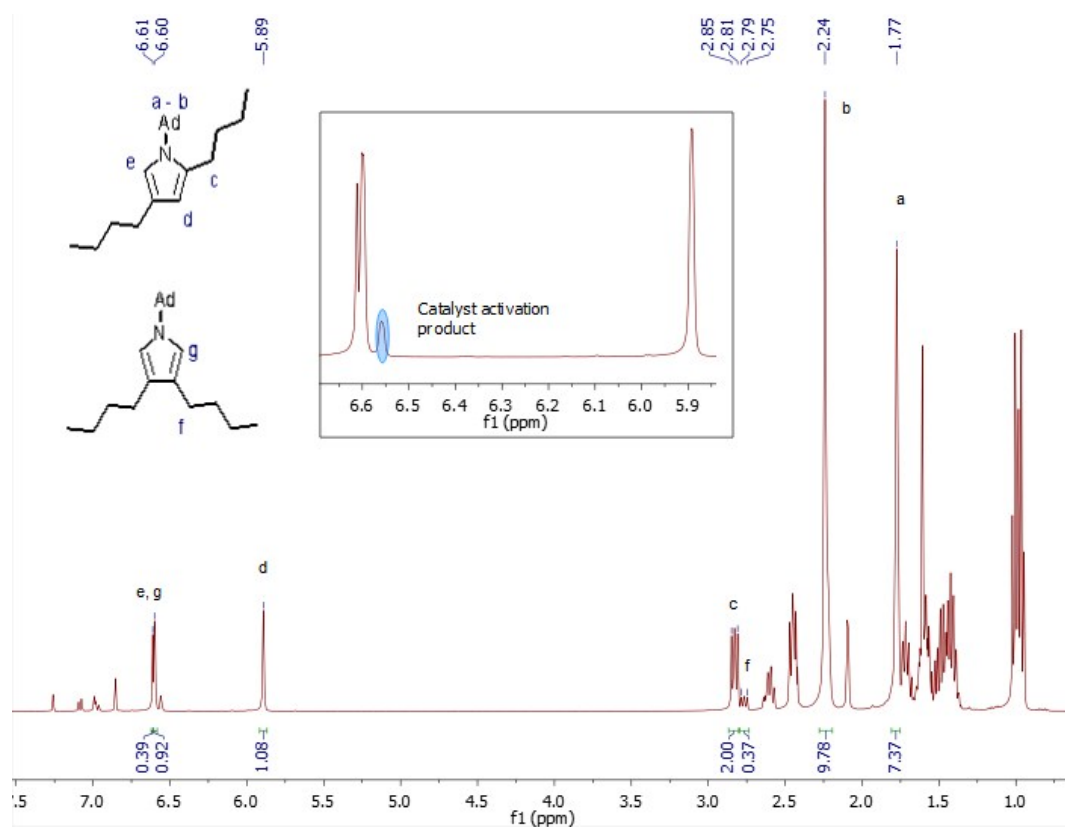

**Figure S92:**  $^1\text{H}$  spectrum of 1-hexyne reaction with 1-azidoadamantane in  $\text{CDCl}_3$ .

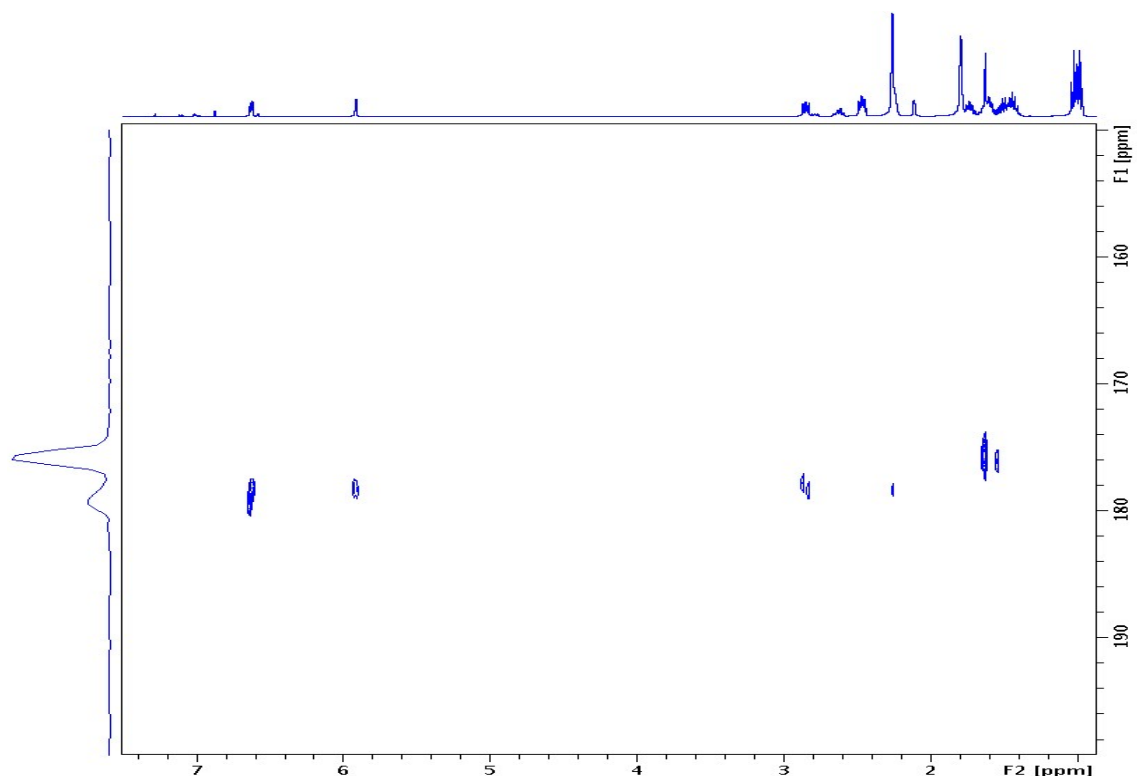

**Figure S93:**  $^{15}\text{N}$ - $^1\text{H}$  HMBC spectrum of 1-hexyne reaction with 1-azidoadamantane in  $\text{CDCl}_3$ .

**NMR analysis of tolylacetylene and 1-azidoadamantane reaction (Table 2, Entry 2)**

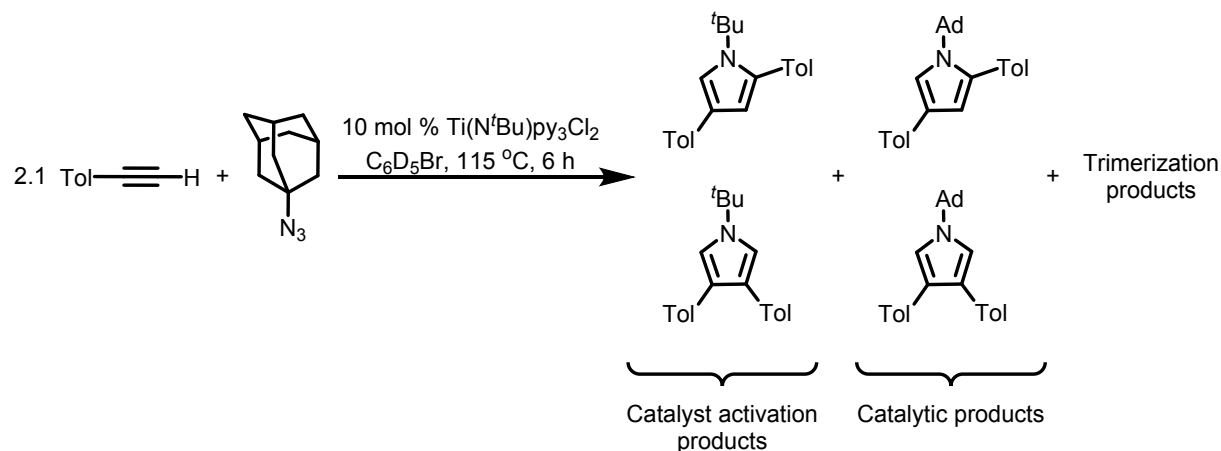

A standard catalytic run with tolylacetylene (53.5  $\mu\text{L}$ , 0.42 mmol, 2.1 equiv.), 1-azidoadamantane (36 mg, 0.2 mmol, 1.0 equiv.) and 0.5 mL of stock solution (terminal alkyne screen) was conducted. The catalytic mixture was analyzed directly without any further purification and the products were identified *in-situ* to give a mixture of products shown above and leftover starting materials.

**2,4-di-*p*-tolyl-1-(adamantyl)-1H-pyrrole (partial)**

$^1\text{H}$  NMR (500 MHz,  $\text{C}_6\text{D}_5\text{Br}$ ):  $\delta$  2.24 (s, 3H, *o*- $\text{C}_6\text{H}_4\text{-CH}_3$ ), 2.21 (s, 6H, *m*-N-pyr- $\text{C}_6\text{H}_4\text{-CH}_3$ ), 1.92 (m, 6H, Ad- $\text{CH}_2$ ), 1.65 – 1.64 (m, 6H, Ad- $\text{CH}_2$ )

The peak at  $\delta$  2.21 overlaps with that of the other pyrrole regioisomer. This is a partial NMR line list, the remaining peaks are either buried under other products or cannot be positively identified in the reaction mixture.

**3,4-di-*p*-tolyl-1-(adamantyl)-1*H*-pyrrole (partial)**

**<sup>1</sup>H NMR (500 MHz, C<sub>6</sub>D<sub>5</sub>Br):** δ 6.93 (s, 2H, *o*-N-pyr-*H*), 2.21 (s, 6H, *o*-N-pyr-C<sub>6</sub>H<sub>4</sub>-CH<sub>3</sub>), 2.05 – 2.04 (m, 6H, Ad-CH<sub>2</sub>), 2.00 (br s, 3H, Ad-CH), 1.44 (s, 6H, Ad-CH<sub>2</sub>)

The peak at δ 2.21 overlaps with that of the other pyrrole regioisomer. This is a partial NMR line list, the remaining peaks are either buried under other products or cannot be positively identified in the reaction mixture.

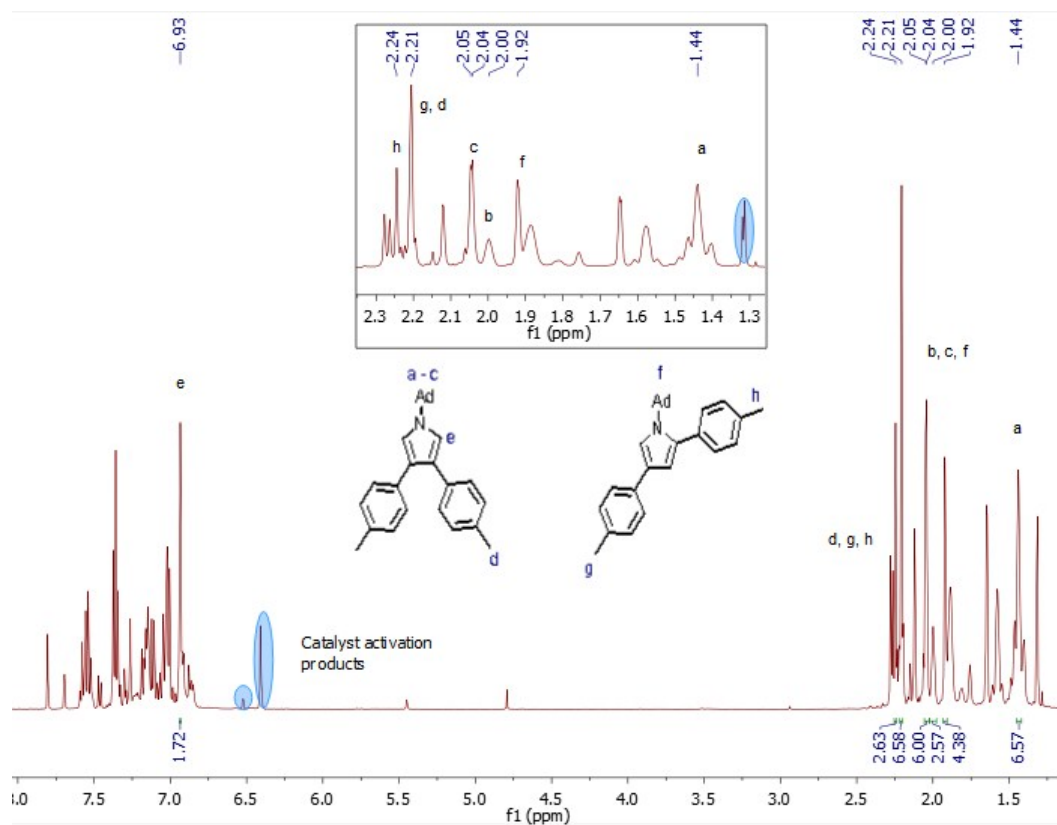

**Figure S94:** <sup>1</sup>H spectrum of tolylacetylene reaction with 1-azidoadamantane in C<sub>6</sub>D<sub>5</sub>Br.



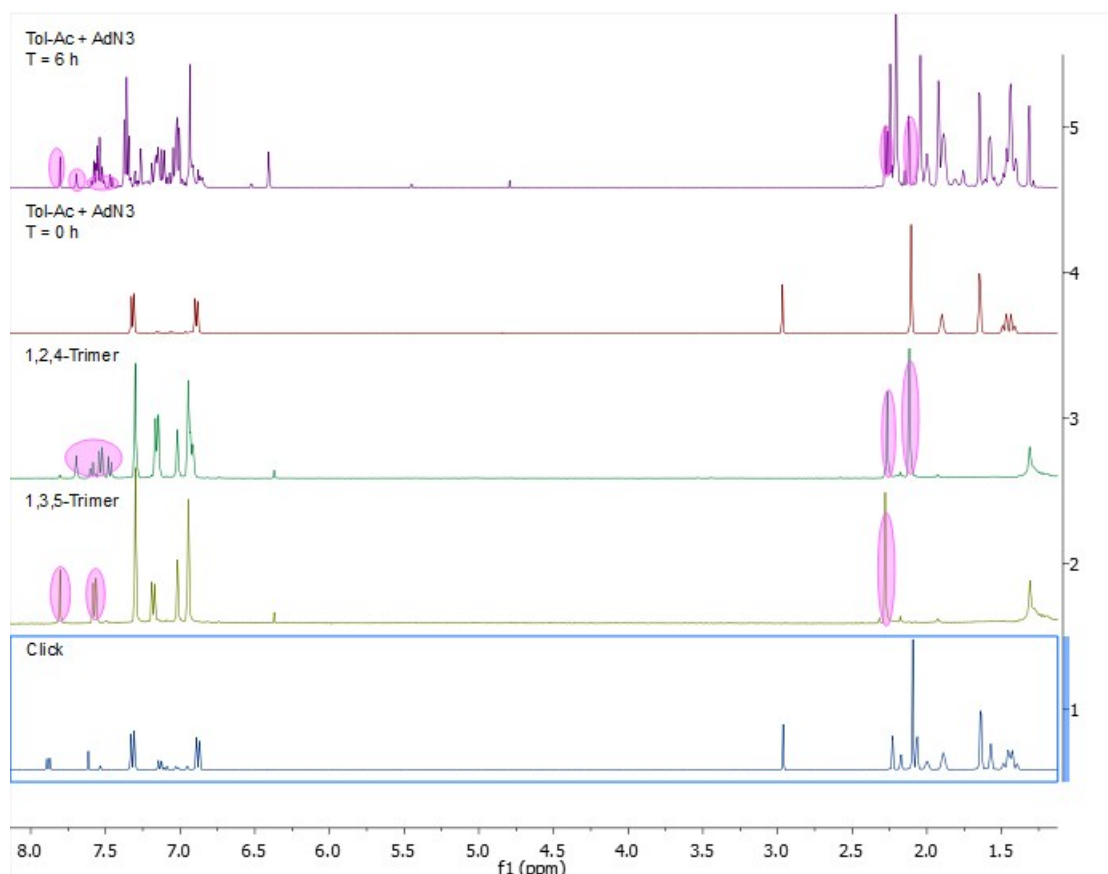

**Figure S95:** Stacked  $^1\text{H}$  spectrum of tolylacetylene reaction with 1-azidoadamantane  $t = 6$  h (5),  $t = 0$  h (4), 1,2,4-trimer (3), 1,3,5-trimer (2) and click reaction (1) in  $\text{C}_6\text{D}_5\text{Br}$ .

#### NMR analysis of (*t*-butyl)acetylene and (*p*-tolyl)azide reaction (Table 2, Entry 3)

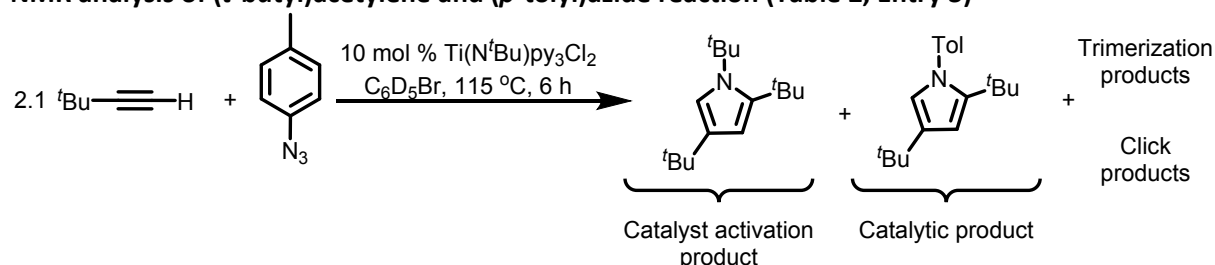

A standard catalytic run with (*t*-butyl)acetylene (54  $\mu\text{L}$ , 0.44 mmol, 2.1 equiv.), (*p*-tolyl)azide (28 mg, 0.21 mmol, 1.0 equiv.) and 0.5 mL of stock solution (terminal alkyne screen) was conducted. The catalytic mixture was analyzed directly without any further purification and the products were identified *in-situ* to give a mixture of products shown above, leftover starting materials and azide decomposition products.

#### 2,4-di-*t*-butyl-1-(*p*-tolyl)-1-*H*-pyrrole (partial)

$^1\text{H}$  NMR (400 MHz,  $\text{C}_6\text{D}_5\text{Br}$ ):  $\delta$  6.14 (d,  $^4J_{\text{HH}} = 2.1$  Hz, 1H, *m*-N-pyr-*H*), 2.17 (s, 3H,  $\text{NC}_6\text{H}_4\text{-CH}_3$ ), 1.30 (s, 9H, *o*-N-pyr- $^t\text{Bu}$ ), 1.16 (s, 9H, *m*-N-pyr- $^t\text{Bu}$ )

The peak at  $\delta$  1.16 overlaps with the remaining starting material, (*t*-butyl)acetylene. This is a partial NMR line list, the remaining aromatic peaks cannot be positively identified in the reaction mixture.

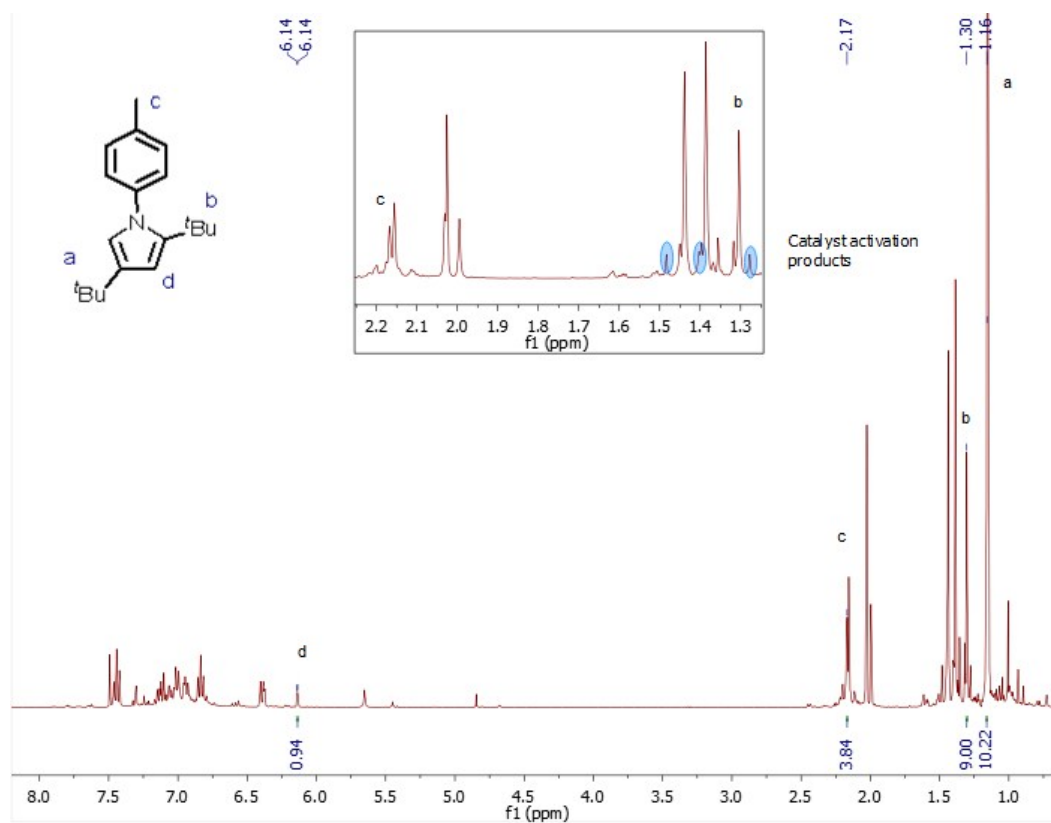

**Figure S96:**  $^1\text{H}$  spectrum of (t-butyl)acetylene reaction with 1-azidoadamantane in  $\text{C}_6\text{D}_5\text{Br}$ .

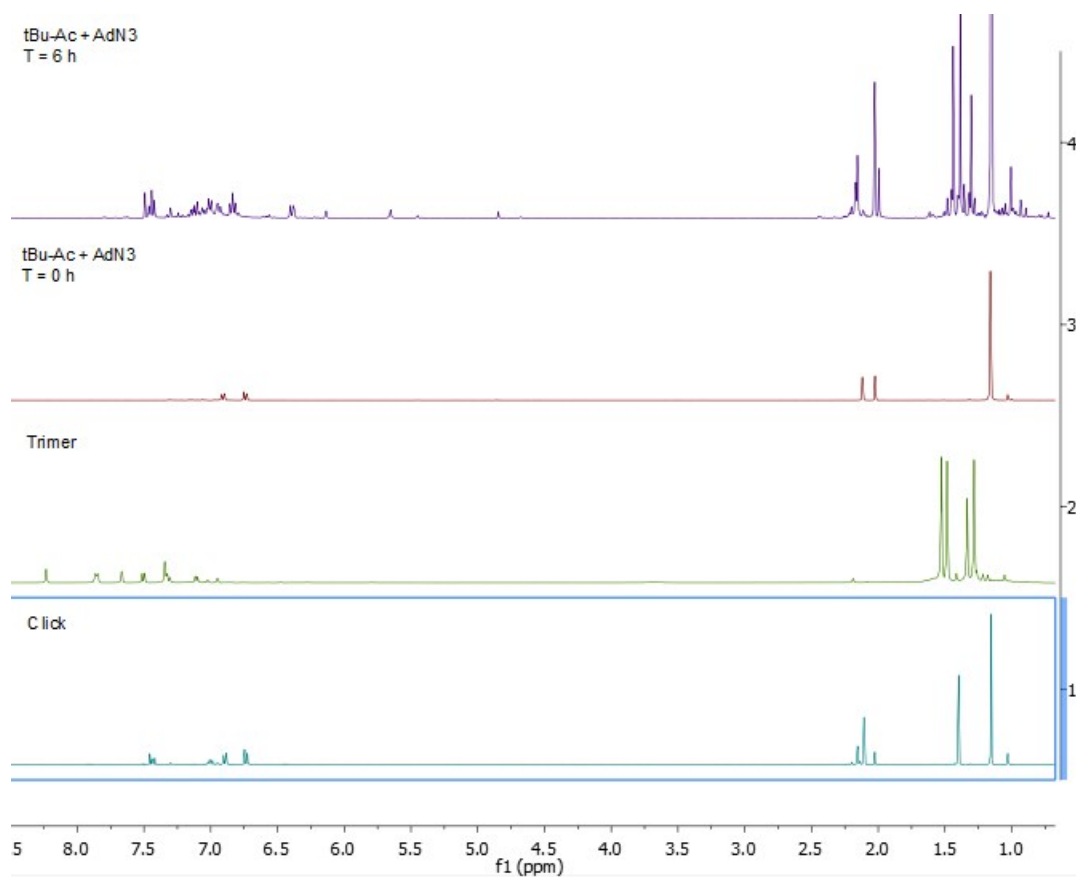

**Figure S97:** Stacked  $^1\text{H}$  spectrum of (t-butyl)acetylene reaction with 1-azidoadamantane t = 6 h (4), t = 0 h (3), trimer reaction (2) and click reaction (1) in  $\text{C}_6\text{D}_5\text{Br}$ .

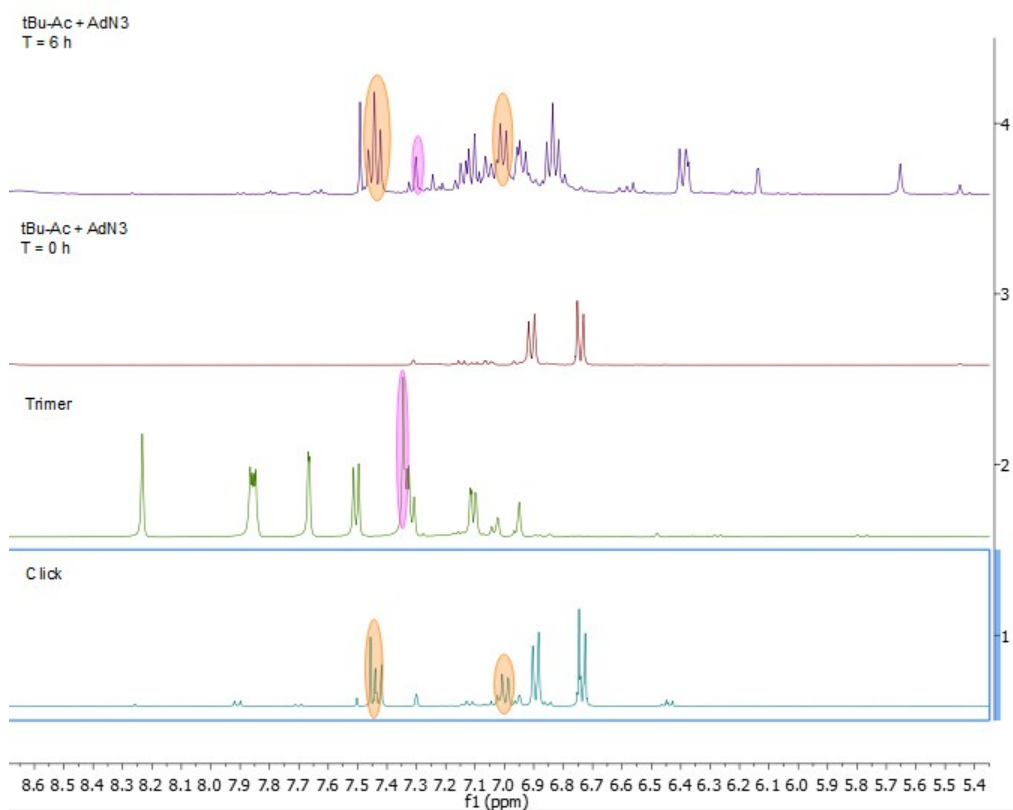

**Figure S98:** Zoom-in stacked  $^1\text{H}$  spectrum of (*t*-butyl)acetylene reaction with 1-azidoadamantane  $t = 6$  h (4),  $t = 0$  h (3), trimer reaction (2) and click reaction (1) in  $\text{C}_6\text{D}_5\text{Br}$ .

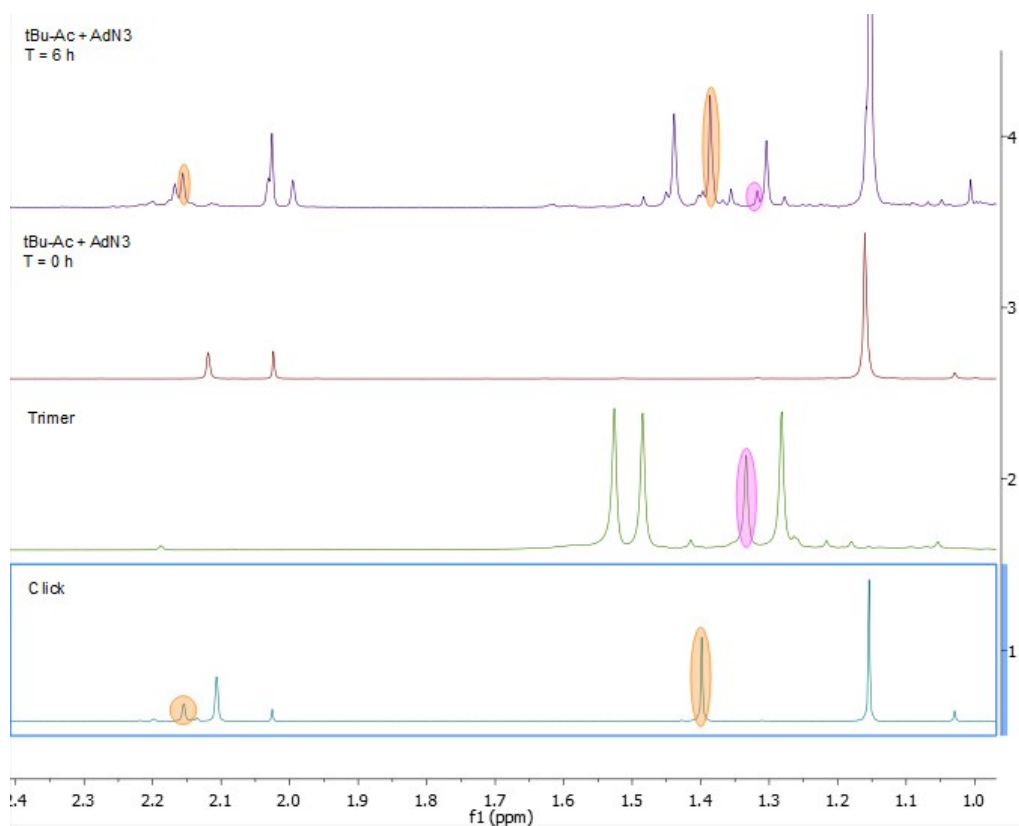

**Figure S99:** Zoom-in stacked  $^1\text{H}$  spectrum of (*t*-butyl)acetylene reaction with 1-azidoadamantane  $t = 6$  h (4),  $t = 0$  h (3), trimer reaction (2) and click reaction (1) in  $\text{C}_6\text{D}_5\text{Br}$ .

### NMR analysis of trimethylsilylacetylene and 1-azidoadamantane reaction (Table 2, Entry 4)

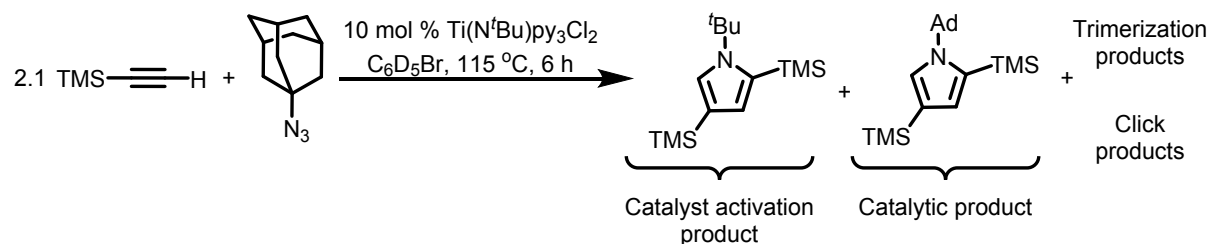

A standard catalytic run with (trimethylsilyl)acetylene (58  $\mu\text{L}$ , 0.42 mmol, 2.1 equiv.), 1-azidoadamantane (35 mg, 0.2 mmol, 1.0 equiv.) and 0.5 mL of stock solution (terminal alkyne screen) was conducted. The catalytic mixture was analyzed directly without any further purification and the products were identified *in-situ* to give a mixture of products shown above and leftover starting materials.

#### 2,4-bis-(trimethylsilyl)-1-(adamantyl)-1H-pyrrole (partial)

**$^1\text{H}$  NMR (400 MHz,  $\text{C}_6\text{D}_5\text{Br}$ ):**  $\delta$  7.30 (d,  $^4J_{\text{HH}} = 1.6 \text{ Hz}$ , 1H, *o*-N-pyr-H), 6.82 (d,  $^4J_{\text{HH}} = 1.6 \text{ Hz}$ , 1H, *m*-N-pyr-H), 2.04 (m, 6H, Ad-CH<sub>2</sub>), 1.58 (br s, 6H, Ad-CH<sub>2</sub>), 0.38 (s, 9H, N-pyr-C2-Si(CH<sub>3</sub>)<sub>3</sub>), 0.29 (s, 9H, N-pyr-C4-Si(CH<sub>3</sub>)<sub>3</sub>)

The peak at  $\delta$  2.04 overlaps with that of the click product. This is a partial NMR line list, the remaining adamantyl peak is buried under other products.

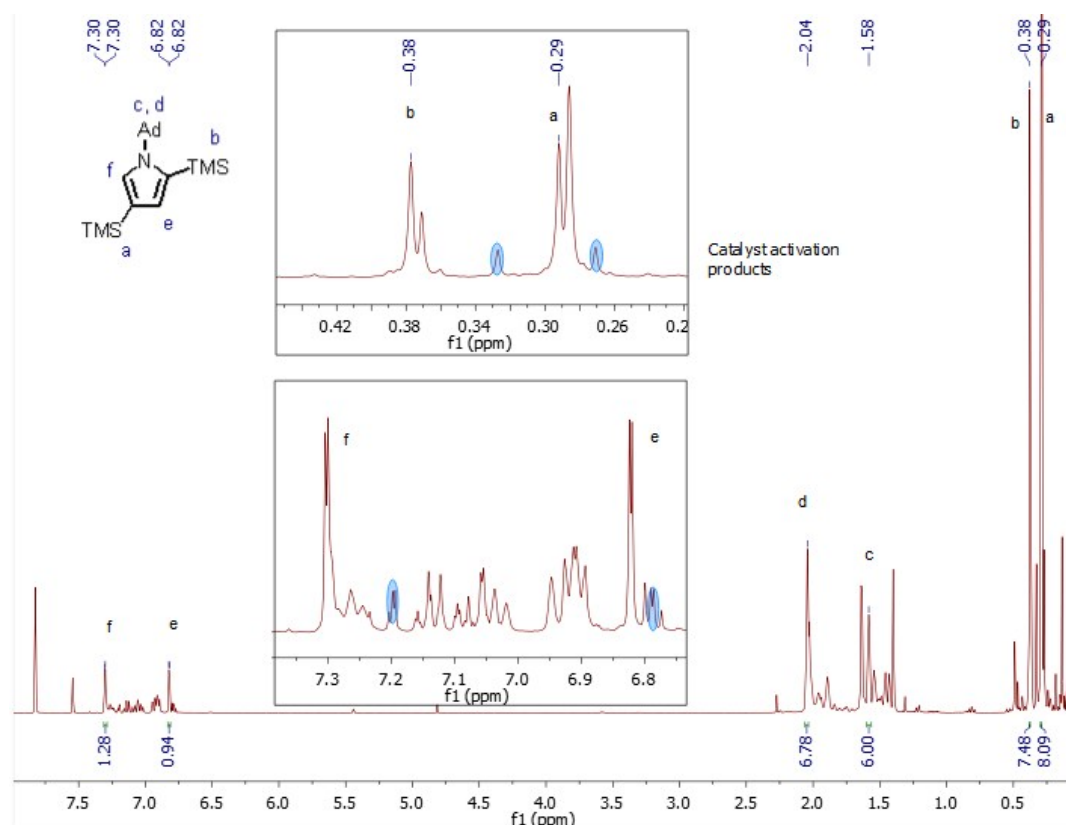

**Figure S100:**  $^1\text{H}$  spectrum of (trimethylsilyl)acetylene reaction with 1-azidoadamantane in  $\text{C}_6\text{D}_5\text{Br}$ .

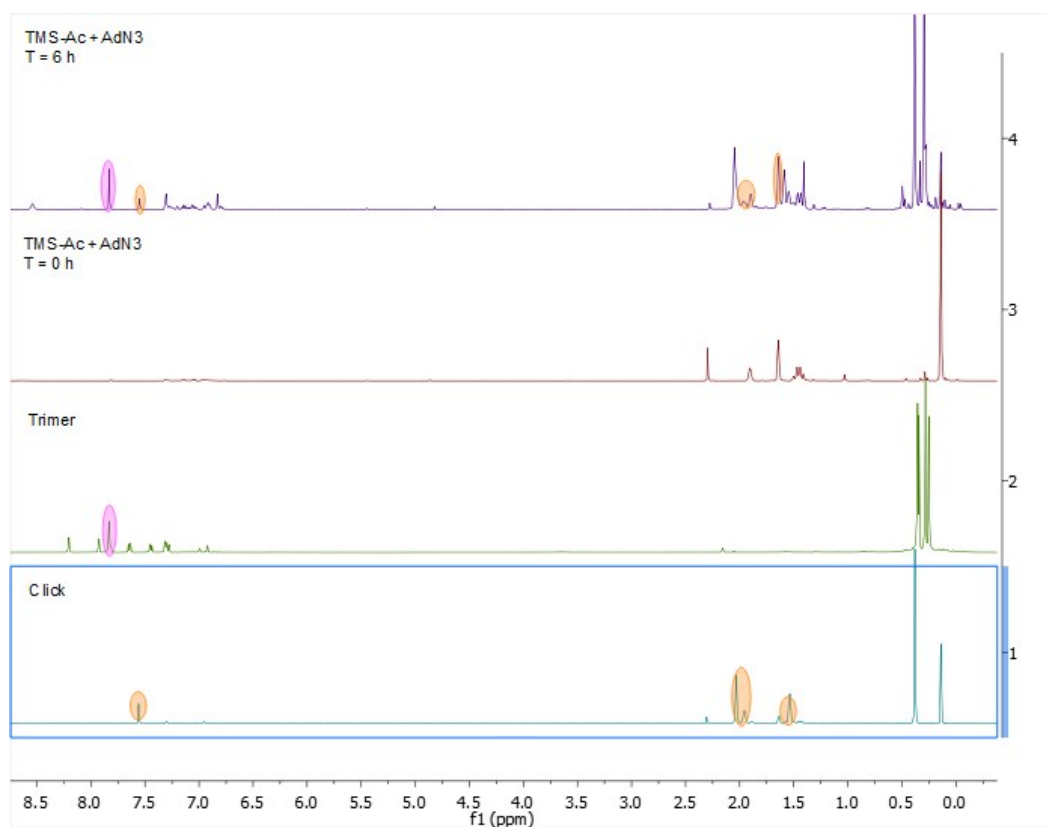

**Figure S101:** Stacked  $^1\text{H}$  spectrum of (trimethylsilyl)acetylene reaction with 1-azidoadamantane  $t = 6$  h (4),  $t = 0$  h (3), trimer reaction (2) and click reaction (1) in  $\text{C}_6\text{D}_5\text{Br}$ .

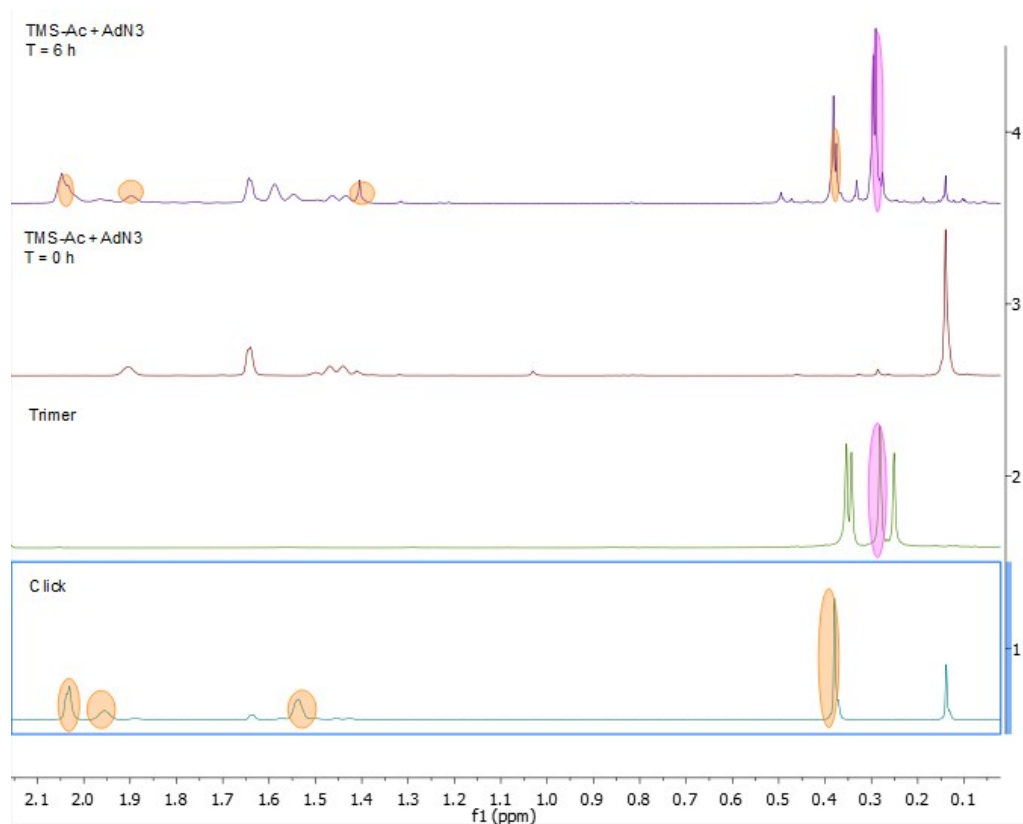

**Figure S102:** Zoom-in stacked  $^1\text{H}$  spectrum of (trimethylsilyl)acetylene reaction with 1-azidoadamantane  $t = 6$  h (4),  $t = 0$  h (3), trimer reaction (2) and click reaction (1) in  $\text{C}_6\text{D}_5\text{Br}$ .

### NMR analysis of 1,7-octadiyne and 1-azidoadamantane reaction (Table 2, Entry 5)

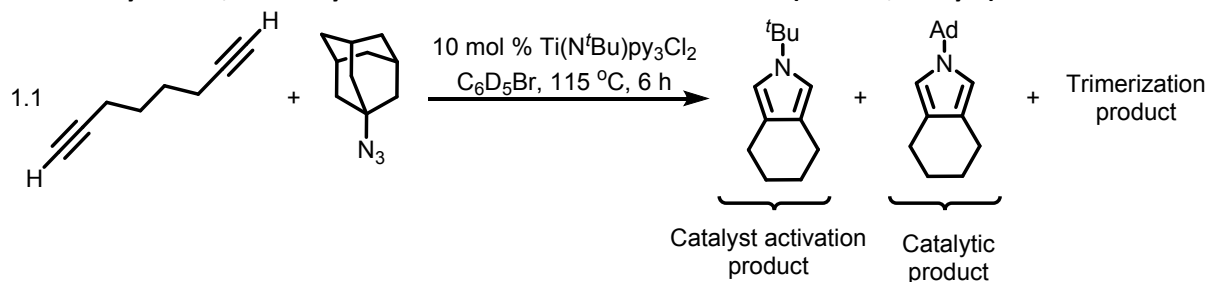

A standard catalytic run with 1,7-octadiyne (28  $\mu\text{L}$ , 0.21 mmol, 1.1 equiv.), 1-azidoadamantane (35 mg, 0.20 mmol, 1.0 equiv.) and 0.5 mL of stock solution (terminal alkyne screen) was conducted. The catalytic mixture was analyzed directly without any further purification and the products were identified *in-situ* to give a mixture of products shown above and leftover starting materials.

#### 2-adamantyl-4,5,6,7-tetrahydro-2H-indole (partial)

$^1\text{H}$  NMR (500 MHz,  $\text{C}_6\text{D}_5\text{Br}$ ):  $\delta$  6.47 (s, 2H, pyr-H), 2.64 (m, 4H, pyr- $\text{CH}_2$ ), 1.97 (s (br), 3H, Ad), 1.87 (d,  $^3J_{\text{HH}} = 3.0$  Hz, 6H, N-C-( $\text{CH}_2$ )<sub>3</sub>) 1.70 (m, 4H, pyr- $\text{CH}_2$ - $\text{CH}_2$ )

All peaks other than the aromatic peak at  $\delta$  6.47 have some degree of overlap with starting material or trimerization.

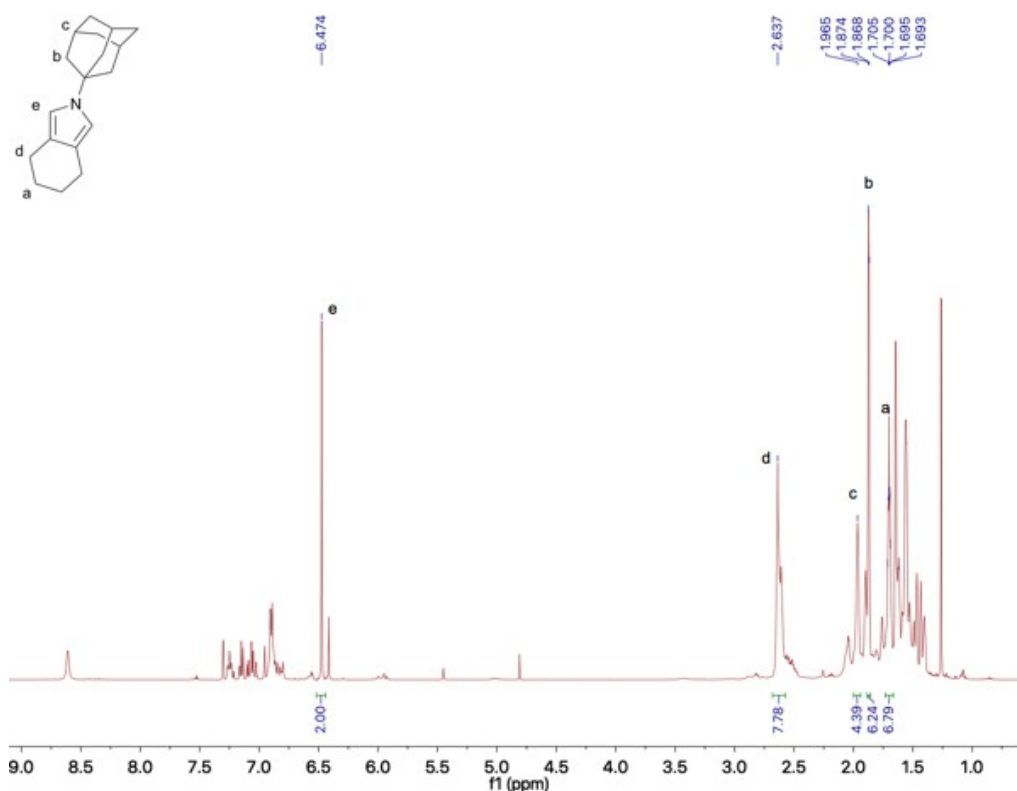

**Figure S103:**  $^1\text{H}$  spectrum of 1,7-octadiyne reaction with 1-azidoadamantane in  $\text{C}_6\text{D}_5\text{Br}$ .

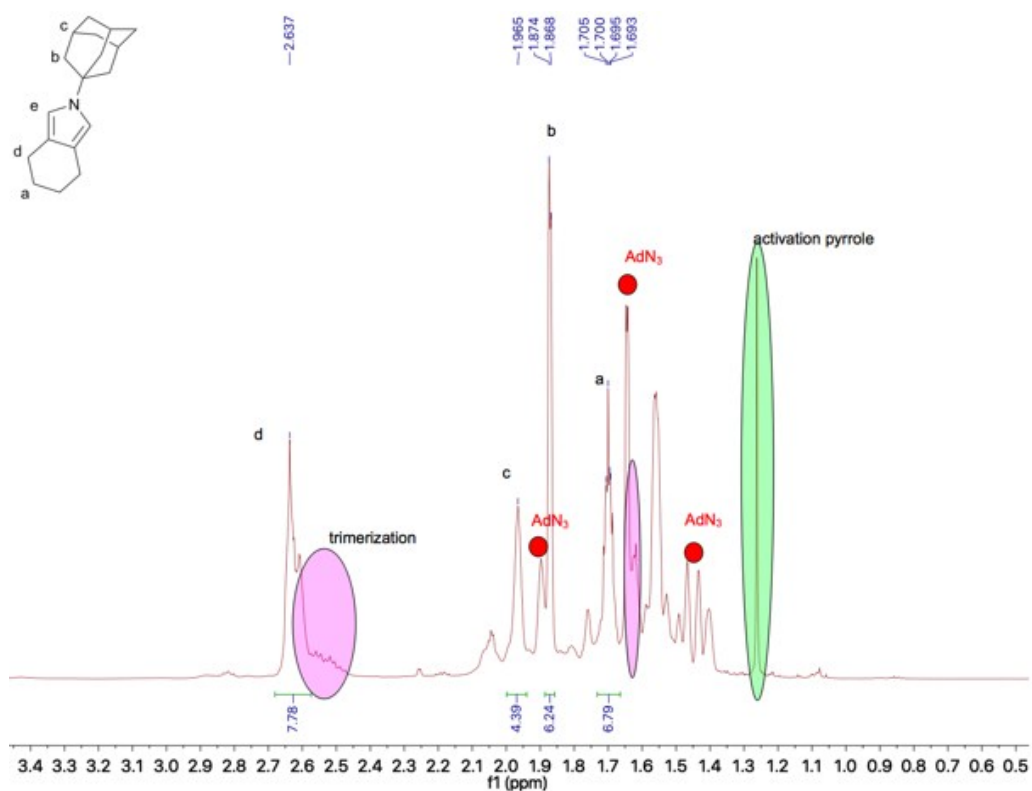

**Figure S104:** Zoom-in  $^1\text{H}$  spectrum of 1,7-octadiyne reaction with 1-azidoadamantane in  $\text{C}_6\text{D}_5\text{Br}$ .

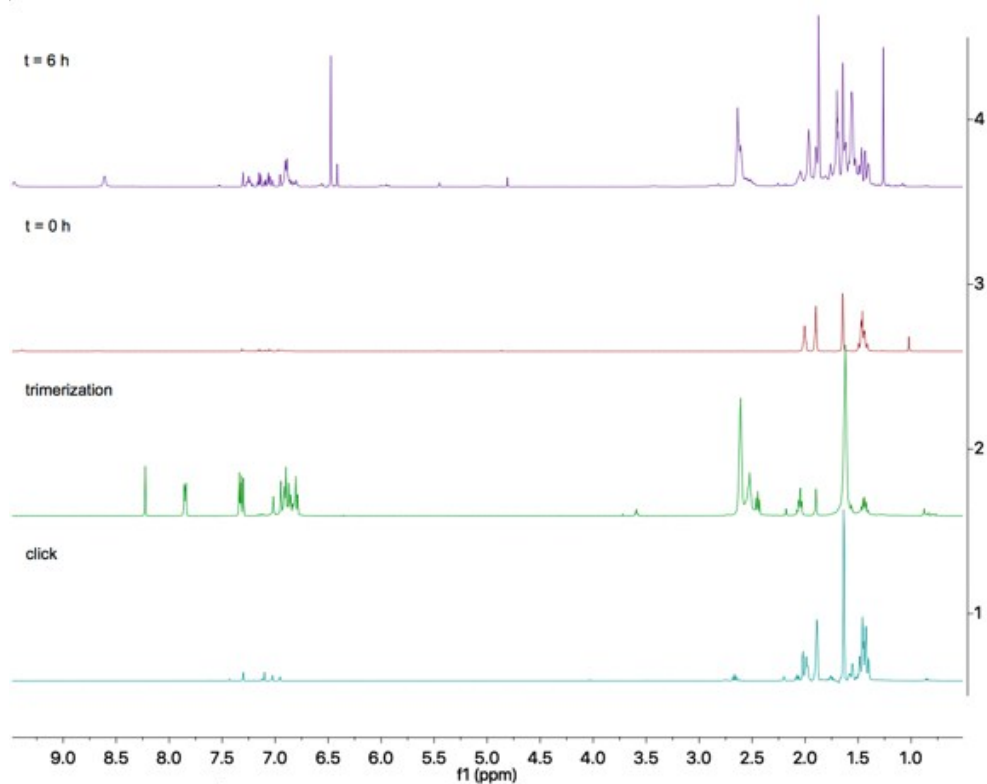

**Figure S105:** Stacked  $^1\text{H}$  spectra of 1,7-octadiyne reaction with 1-azidoadamantane  $t = 6$  h (4),  $t = 0$  h (3), trimer (2) and click reaction (1) in  $\text{C}_6\text{D}_5\text{Br}$ .

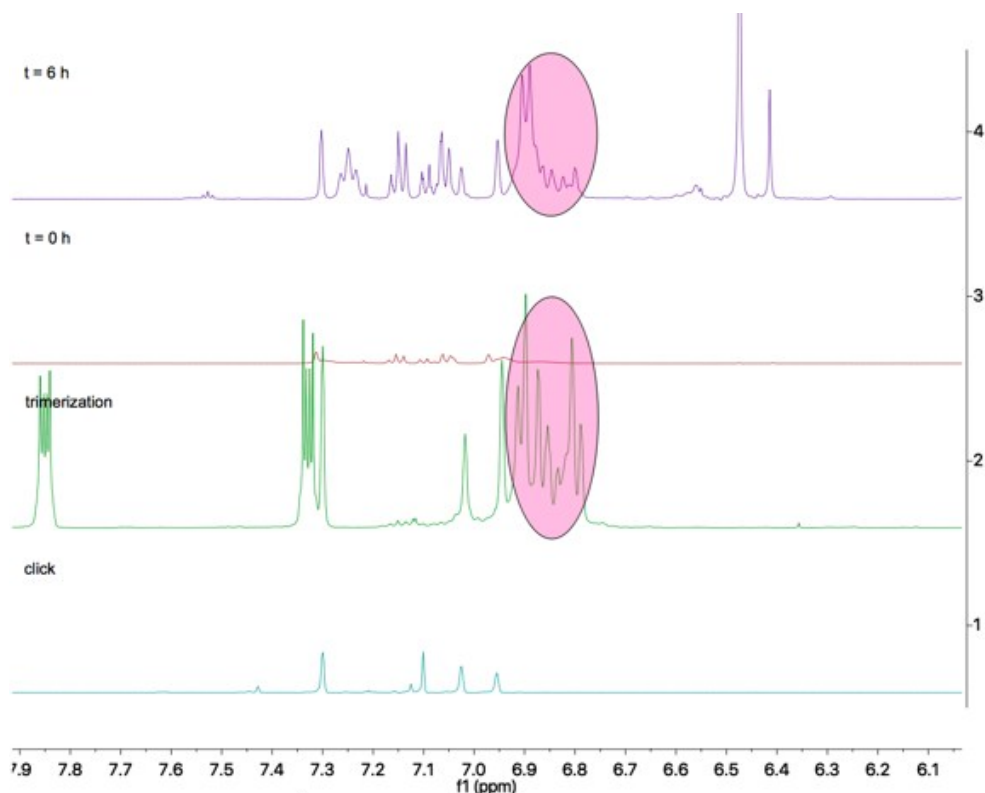

**Figure S106:** Zoom-in stacked  $^1\text{H}$  spectra of 1,7-octadiyne reaction with 1-azidoadamantane  $t = 6$  h (4),  $t = 0$  h (3), trimer (2) and click reaction (1) in  $\text{C}_6\text{D}_5\text{Br}$ .

**Table S3:** Terminal alkyne scope triazole yield, trimer yield and mass balance data

| Table 2, Entry # | Alkyne                                   | Triazole yield (%) <sup>6</sup> | Trimer yield (%) <sup>b</sup> 9 | Azide mass balance (%) | Alkyne mass balance (%) |
|------------------|------------------------------------------|---------------------------------|---------------------------------|------------------------|-------------------------|
| 1                | 1-Hexyne<br><b>2e</b>                    | 10                              | 24 <sup>c</sup>                 | quant.                 | quant.                  |
| 2                | ( <i>p</i> -tolyl)acetylene<br><b>2f</b> | 0                               | 26                              | 87                     | 96                      |
| 3                | ( <i>t</i> -butyl)acetylene<br><b>2g</b> | 12                              | 1                               | 20                     | 53                      |
| 4                | (trimethylsilyl)-acetylene<br><b>2h</b>  | 20                              | 30                              | 93                     | 95                      |
| 5 <sup>a</sup>   | 1,7-octadiyne<br><b>2i</b>               | 0                               | 56                              | 68                     | 97                      |

Conditions:  $\text{AdN}_3$  (0.2 mmol, 1 equiv.), alkyne (0.42 mmol, 2.1 equiv.), 10 mol %  $\text{Ti}(\text{N}^t\text{Bu})\text{py}_3\text{Cl}_2$ , 115 °C, 6 h, 0.5 ml  $\text{C}_6\text{D}_5\text{Br}$ , average of 2 runs. <sup>a</sup>For **2i** (0.21mmol, 1.05 equiv.) was used. <sup>b</sup>Trimer yields are calculated with respect to alkyne. <sup>c</sup>1,2,4-trimer peak overlaps with the internal standard on NMR, results were supplemented by GC-FID.



**Table S4:** Azide scope with terminal alkynes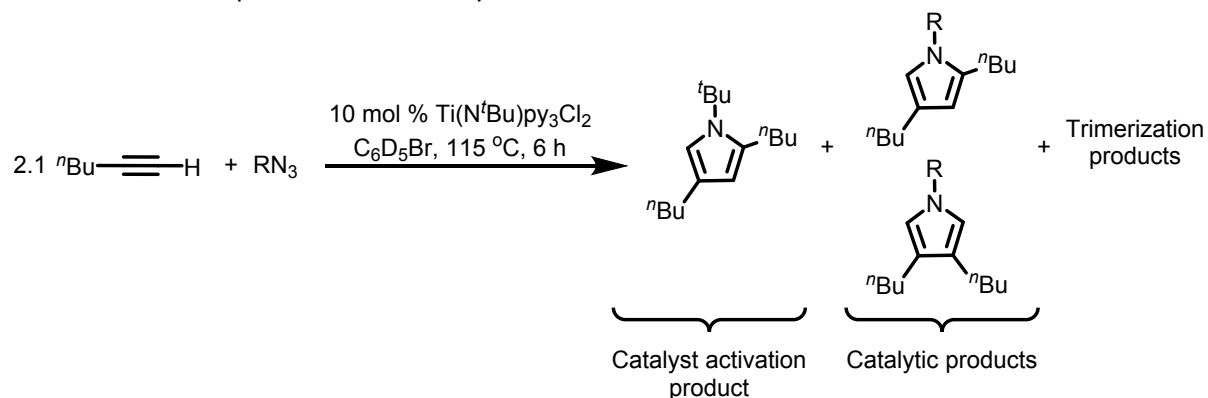

| Entry # | Azide                      | Catalytic pyrrole yield (%) <sup>a</sup> 3 | Trimer yield (%) <sup>b</sup> 9 |
|---------|----------------------------|--------------------------------------------|---------------------------------|
| 1       | Ad<br><b>1b</b>            | 65                                         | 8                               |
| 2       | Ph                         | 38                                         | 8                               |
| 3       | Tol<br><b>1a</b>           | 40                                         | 8                               |
| 4       | <i>n</i> -Dec<br><b>1c</b> | 7                                          | 32                              |
| 5       | Bn<br><b>1d</b>            | 0                                          | 20                              |

Conditions : Azide (0.2 mmol, 1 equiv.), 1-hexyne (0.42 mmol, 2.1 equiv.), 10 mol % Ti(N<sup>t</sup>Bu)py<sub>3</sub>Cl<sub>2</sub>, 115 °C, 6 h, 0.5 ml C<sub>6</sub>D<sub>5</sub>Br. <sup>a</sup>Pyrrole yields are calculated with respect to azide <sup>b</sup>Trimer yields are calculated with respect to alkyne.

## Variable Time Normalization Data<sup>10</sup>

### Reaction Order in Azide

A 5 mL stock solution of  $C_6D_5Br$  containing  $Ph_3CH$  (48.7 mg, 0.199 mmol, 0.0399 M),  $Ti(NTol)(THF)_3I_2$  (62.9 mg, 0.101 mmol, 0.0202 M), and 1-azidoadamantane (178.8 mg, 1.009 mmol, 0.2017 M) was prepared using a 5 mL volumetric flask.

Three screw cap NMR tubes were then loaded with sample:

**Sample A:** The NMR tube was loaded with 0.50 mL of the stock solution, followed by 3-hexyne (57  $\mu$ L, 0.50 mmol, 1.0 M) added *via* syringe.

**Sample B:** The NMR tube was charged with additional 1-azidoadamantane (11.1 mg, 0.063 mmol), followed by 0.50 mL of the stock solution and 3-hexyne (57  $\mu$ L, 0.50 mmol, 1.0 M) *via* syringe.

**Sample C:** The NMR tube was charged with additional 1-azidoadamantane (6.3 mg, 0.036 mmol), followed by 0.50 mL of the stock solution and 3-hexyne (57  $\mu$ L, 0.50 mmol, 1.0 M) *via* syringe.

Precise concentrations in solution were determined by  $^1H$  NMR prior to heating the reactions. Time points were taken throughout the course of the reaction to obtain *in-situ* concentrations of reactants and products.

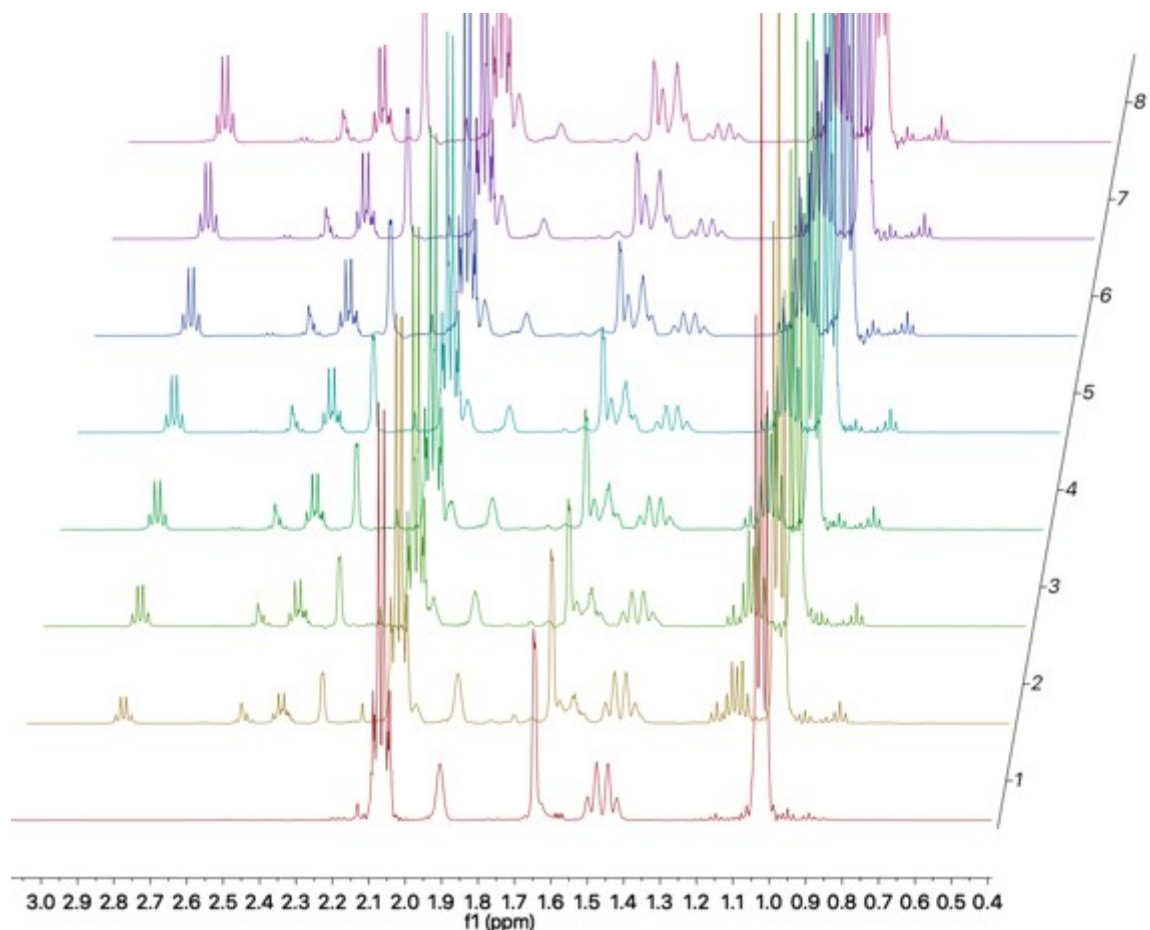

**Figure S107:** Zoom-in stacked  $^1\text{H}$  spectra of time points in the reaction of Sample A.

**Table S5:** Concentrations and 0 order trapezoidal sum of time points of Sample A.

| Sample A |                   |             |                   |             |              |                      |              |          | Azide                  |                    |
|----------|-------------------|-------------|-------------------|-------------|--------------|----------------------|--------------|----------|------------------------|--------------------|
| t (s)    | AdN3<br>(Raw Int) | [AdN3]      | 3Hex<br>(Raw Int) | [3Hex]      | Cat          | Pyrrole<br>(Raw Int) | [Pyrrole]    | [Trimer] | 0 Order<br>Trapezoidal | Sum<br>(Trapezoid) |
| 0        | 32.31             | <b>0.21</b> | 147.9             | <b>0.98</b> | <b>0.017</b> | 0                    | 0            | 0        | 0                      | 0                  |
| 600      | 21.98             | 0.15        | 121.31            | 0.81        | 0.017        | 4.47                 | <b>0.045</b> | 0        | 600                    | <b>600</b>         |
| 1265     | 17.63             | 0.12        | 112.07            | 0.74        | 0.017        | 7.12                 | <b>0.071</b> | 0        | 665                    | <b>1265</b>        |
| 1797     | 15.23             | 0.10        | 111.54            | 0.74        | 0.017        | 8.45                 | <b>0.084</b> | 0        | 532                    | <b>1797</b>        |
| 2516     | 13.1              | 0.09        | 107.35            | 0.71        | 0.017        | 9.79                 | <b>0.098</b> | 0        | 719                    | <b>2516</b>        |
| 3809     | 10.76             | 0.07        | 102.13            | 0.68        | 0.017        | 11.06                | <b>0.110</b> | 0        | 1293                   | <b>3809</b>        |
| 4884     | 8.78              | 0.06        | 98.56             | 0.65        | 0.017        | 11.98                | <b>0.119</b> | 0        | 1075                   | <b>4884</b>        |
| 6214     | 7.88              | 0.05        | 97.61             | 0.65        | 0.017        | 13.11                | <b>0.131</b> | 0        | 1330                   | <b>6214</b>        |

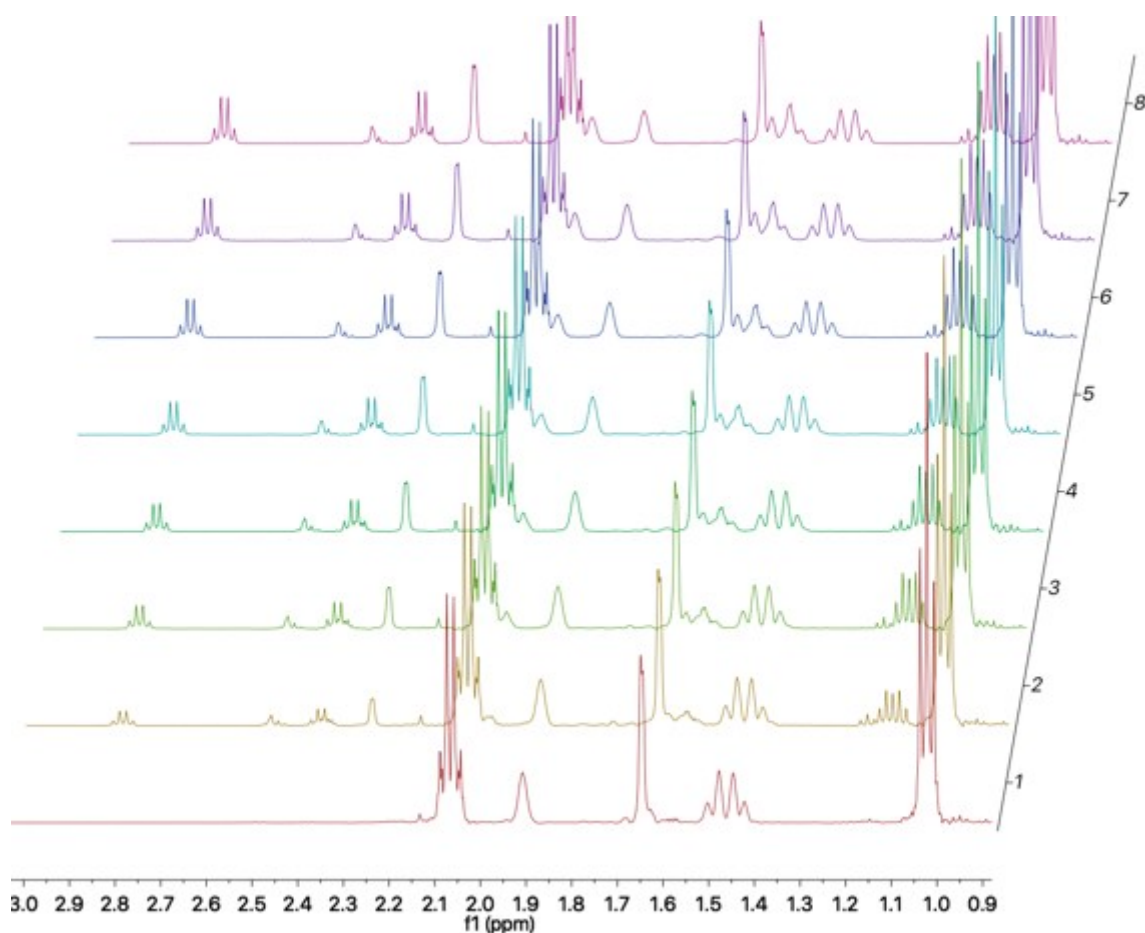

**Figure S108:** Zoom-in stacked  $^1\text{H}$  spectra of time points in the reaction of Sample B.

**Table S6:** Concentrations and 0 order trapezoidal sum (with respect to azide concentration) of time points of Sample B.

| Sample B |                   |             |                   |             |              |                      |              |          | Azide                  |                    |
|----------|-------------------|-------------|-------------------|-------------|--------------|----------------------|--------------|----------|------------------------|--------------------|
| t (s)    | AdN3<br>(Raw Int) | [AdN3]      | 3Hex<br>(Raw Int) | [3Hex]      | Cat          | Pyrrole<br>(Raw Int) | [Pyrrole]    | [Trimer] | 0 Order<br>Trapezoidal | Sum<br>(Trapezoid) |
| 0        | 50.42             | <b>0.33</b> | 151.28            | <b>1.01</b> | <b>0.016</b> | 0                    | <b>0</b>     | 0        | 0                      | 0                  |
| 637      | 41.29             | 0.27        | 126.95            | 0.84        | 0.016        | 4.95                 | <b>0.049</b> | 0        | 637                    | <b>637</b>         |
| 1268     | 36.43             | 0.24        | 117.04            | 0.78        | 0.016        | 7.5                  | <b>0.075</b> | 0        | 631                    | <b>1268</b>        |
| 1816     | 33.87             | 0.23        | 114.55            | 0.76        | 0.016        | 8.92                 | <b>0.089</b> | 0        | 548                    | <b>1816</b>        |
| 2578     | 31.65             | 0.21        | 109.3             | 0.73        | 0.016        | 10.31                | <b>0.103</b> | 0        | 762                    | <b>2578</b>        |
| 3650     | 29.2              | 0.19        | 104.86            | 0.70        | 0.016        | 11.68                | <b>0.116</b> | 0        | 1072                   | <b>3650</b>        |
| 4709     | 27.57             | 0.18        | 102.31            | 0.68        | 0.016        | 12.71                | <b>0.127</b> | 0        | 1059                   | <b>4709</b>        |
| 6172     | 26.04             | 0.17        | 96.91             | 0.64        | 0.016        | 13.41                | <b>0.134</b> | 0        | 1463                   | <b>6172</b>        |

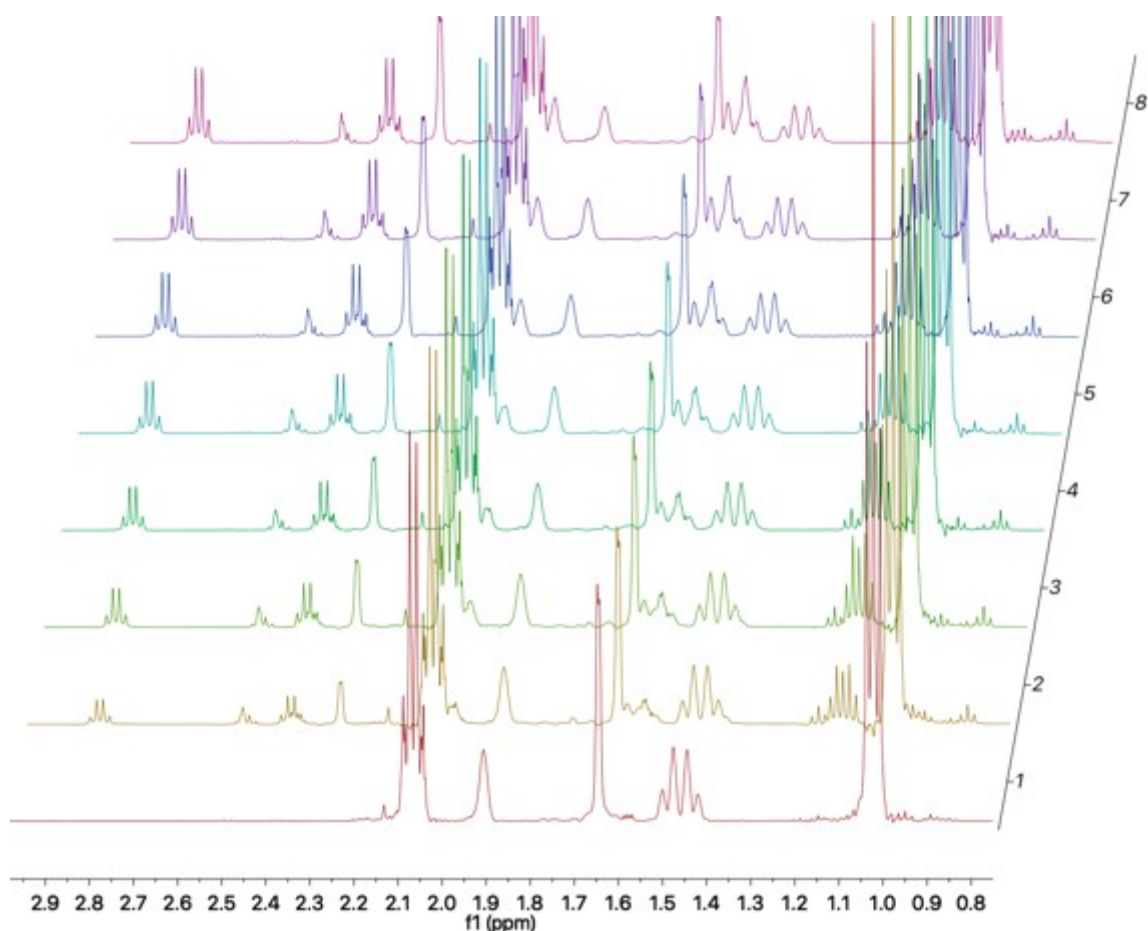

**Figure S109:** Zoom-in stacked  $^1\text{H}$  spectra of time points in the reaction of Sample C.

**Table S7:** Concentrations and 0 order trapezoidal sum (with respect to azide concentration) of time points of Sample C.

| Sample C |           |             |           |             |              |           |              |          | Azide       |             |
|----------|-----------|-------------|-----------|-------------|--------------|-----------|--------------|----------|-------------|-------------|
| t (s)    | AdN3      |             | 3Hex      |             | Cat          | Pyrrole   |              | [Trimer] | 0 Order     | Sum         |
|          | (Raw Int) | [AdN3]      | (Raw Int) | [3Hex]      |              | (Raw Int) | [Pyrrole]    |          | Trapezoidal | (Trapezoid) |
| 0        | 41.33     | <b>0.27</b> | 149.05    | <b>0.99</b> | <b>0.017</b> | 0         | 0            | 0        | 0           | 0           |
| 609      | 32.35     | 0.21        | 124.81    | 0.83        | 0.017        | 4.96      | <b>0.049</b> | 0        | 609         | <b>609</b>  |
| 1245     | 27.83     | 0.18        | 115.97    | 0.77        | 0.017        | 7.37      | <b>0.073</b> | 0        | 636         | <b>1245</b> |
| 1802     | 25.49     | 0.17        | 114.78    | 0.76        | 0.017        | 8.41      | <b>0.084</b> | 0        | 557         | <b>1802</b> |
| 2405     | 23.33     | 0.15        | 110.21    | 0.73        | 0.017        | 9.68      | <b>0.096</b> | 0        | 603         | <b>2405</b> |
| 3596     | 20.42     | 0.14        | 103.16    | 0.69        | 0.017        | 11.27     | <b>0.112</b> | 0        | 1191        | <b>3596</b> |
| 4681     | 18.83     | 0.13        | 100.28    | 0.67        | 0.017        | 12.17     | <b>0.121</b> | 0        | 1085        | <b>4681</b> |
| 6226     | 17.52     | 0.12        | 99.01     | 0.66        | 0.017        | 12.95     | <b>0.129</b> | 0        | 1545        | <b>6226</b> |

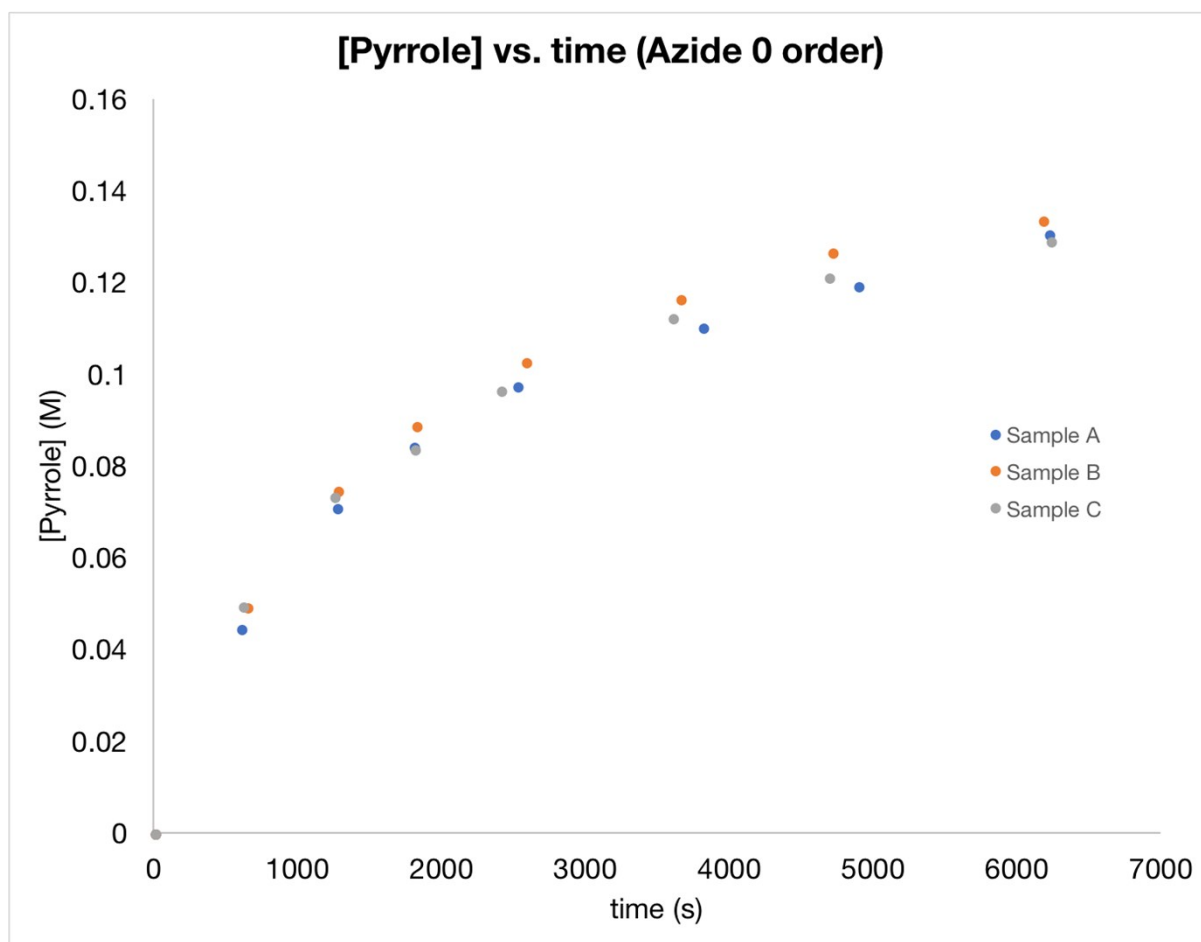

**Figure S110:** Concentration of pyrrole vs. time for Sample A ( $[\text{AdN}_3]_0 = 0.21 \text{ M}$ ), B ( $[\text{AdN}_3]_0 = 0.33 \text{ M}$ ) and C ( $[\text{AdN}_3]_0 = 0.27 \text{ M}$ ), showing 0<sup>th</sup> order with respect to  $\text{AdN}_3$ .

### **Reaction Order in Alkyne and Catalyst**

A 5 mL stock solution of  $C_6D_5Br$  containing  $Ph_3CH$  (49 mg, 0.20 mmol, 0.040 M),  $Ti(Ntol)(THF)_3I_2$  (125 mg, 0.20 mmol, 0.040 M), and 1-azidoadamantane (230 mg, 1.3 mmol, 0.26 M) was prepared using a 5 mL volumetric flask.

Five screw cap NMR tubes were then loaded with sample:

**Sample A':** The NMR tube was loaded with 0.50 mL of the stock solution, followed by 3-hexyne (45  $\mu$ L, 0.40 mmol, 0.80 M) added *via* syringe.

**Sample B':** The NMR tube was loaded with 0.50 mL of the stock solution and 3-hexyne (52  $\mu$ L, 0.46 mmol, 0.92 M) *via* syringe.

**Sample C':** The NMR tube was loaded with 0.50 mL of the stock solution and 3-hexyne (60  $\mu$ L, 0.55 mmol, 1.1 M) *via* syringe.

**Sample D':** The NMR tube was charged with additional  $Ti(Ntol)(THF)_3I_2$  (3.9 mg, 0.0063 mmol), followed by 0.50 mL of stock and 3-hexyne (45  $\mu$ L, 0.40 mmol, 0.80 M).

**Sample E':** The NMR tube was charged with additional  $Ti(Ntol)(THF)_3I_2$  (6.6 mg, 0.011 mmol) followed by 0.50 mL of stock and 3-hexyne (45  $\mu$ L, 0.40 mmol, 0.80 M).

Precise concentrations in solution were determined by  $^1H$  NMR prior to heating the reactions. Time points were taken throughout the course of the reaction to obtain *in situ* concentrations of reactants and products.

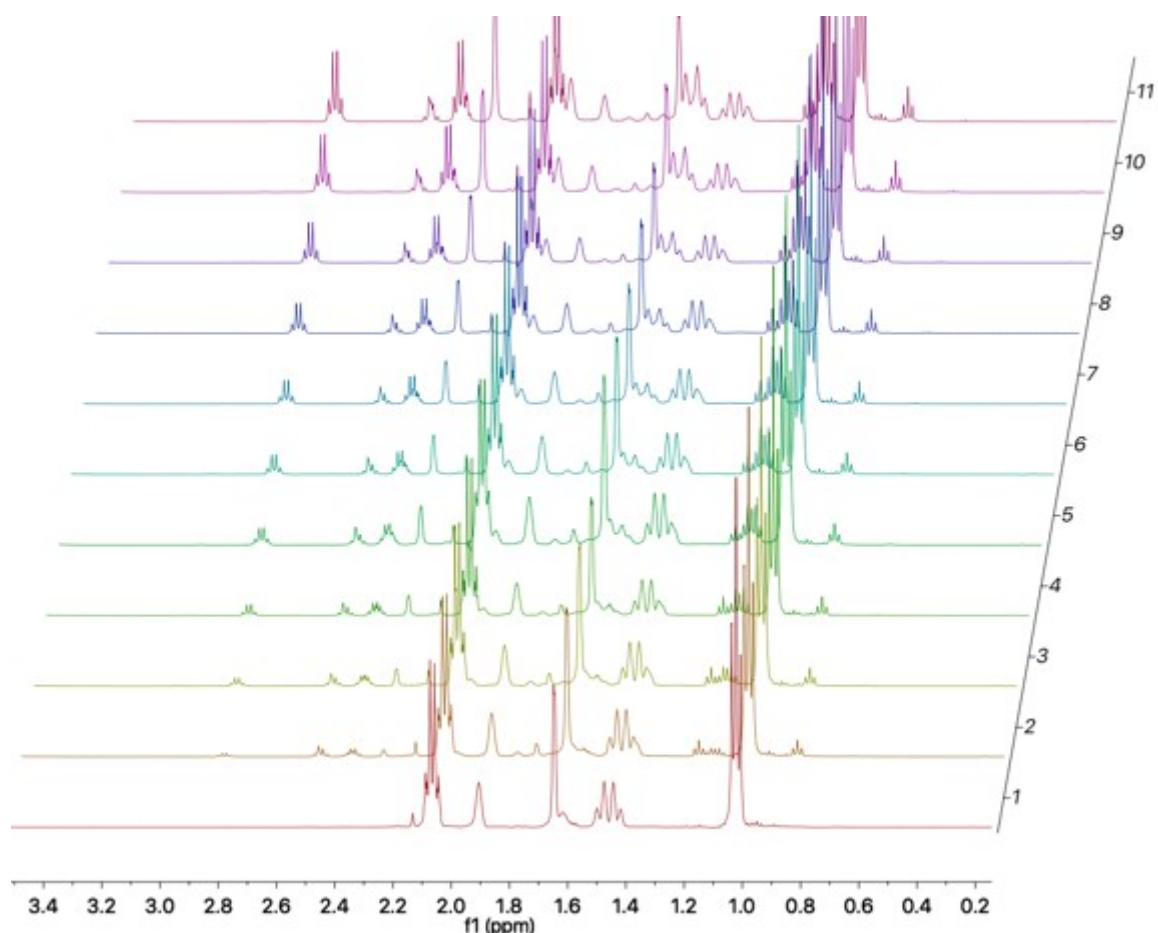

**Figure S111:** Zoom-in stacked  $^1\text{H}$  spectra of time points in the reaction of Sample A'.

**Table S8:** Concentrations, second order trapezoidal sum (with respect to alkyne), and first order trapezoidal sum (with respect to catalyst) of time points of Sample A'.

| t    | AdN <sub>3</sub><br>(Raw Int) | [AdN <sub>3</sub> ] | 3-Hex<br>(Raw Int) | [3-hex] | [Cat] | Pyrrole<br>(Raw Int) | [Pyrrole]    | Alkyne      |                 | Catalyst<br>First Order<br>Trapezoidal |
|------|-------------------------------|---------------------|--------------------|---------|-------|----------------------|--------------|-------------|-----------------|----------------------------------------|
|      |                               |                     |                    |         |       |                      |              | 2nd Order   | Sum             |                                        |
|      |                               |                     |                    |         |       |                      |              | Trapezoidal | (Trapezoid)     |                                        |
| 0    | 20.870                        | 0.278               | 104.590            | 0.697   | 0.030 | 0.000                | <b>0.000</b> | 0.000       | <b>0.000</b>    | 0.000                                  |
| 210  | 16.450                        | 0.219               | 86.350             | 0.576   | 0.030 | 0.990                | <b>0.010</b> | 85.069      | <b>85.069</b>   | 6.258                                  |
| 660  | 15.380                        | 0.205               | 81.250             | 0.542   | 0.030 | 2.660                | <b>0.027</b> | 140.449     | <b>225.518</b>  | 19.668                                 |
| 1050 | 14.680                        | 0.196               | 78.520             | 0.523   | 0.030 | 3.620                | <b>0.036</b> | 110.615     | <b>336.132</b>  | 31.290                                 |
| 1590 | 13.420                        | 0.179               | 72.500             | 0.483   | 0.030 | 4.810                | <b>0.048</b> | 136.842     | <b>472.975</b>  | 47.382                                 |
| 2059 | 12.730                        | 0.170               | 70.930             | 0.473   | 0.030 | 5.620                | <b>0.056</b> | 107.204     | <b>580.178</b>  | 61.358                                 |
| 2782 | 12.180                        | 0.162               | 68.220             | 0.455   | 0.030 | 6.980                | <b>0.070</b> | 155.547     | <b>735.726</b>  | 82.904                                 |
| 3619 | 10.970                        | 0.146               | 62.710             | 0.418   | 0.030 | 8.390                | <b>0.084</b> | 159.427     | <b>895.152</b>  | 107.846                                |
| 5246 | 9.200                         | 0.123               | 54.780             | 0.365   | 0.030 | 10.810               | <b>0.108</b> | 249.544     | <b>1144.696</b> | 156.331                                |
| 7560 | 7.740                         | 0.103               | 48.500             | 0.323   | 0.030 | 12.980               | <b>0.130</b> | 274.254     | <b>1418.950</b> | 225.288                                |
| 9394 | 6.960                         | 0.093               | 44.940             | 0.300   | 0.030 | 13.980               | <b>0.140</b> | 177.919     | <b>1596.869</b> | 279.941                                |



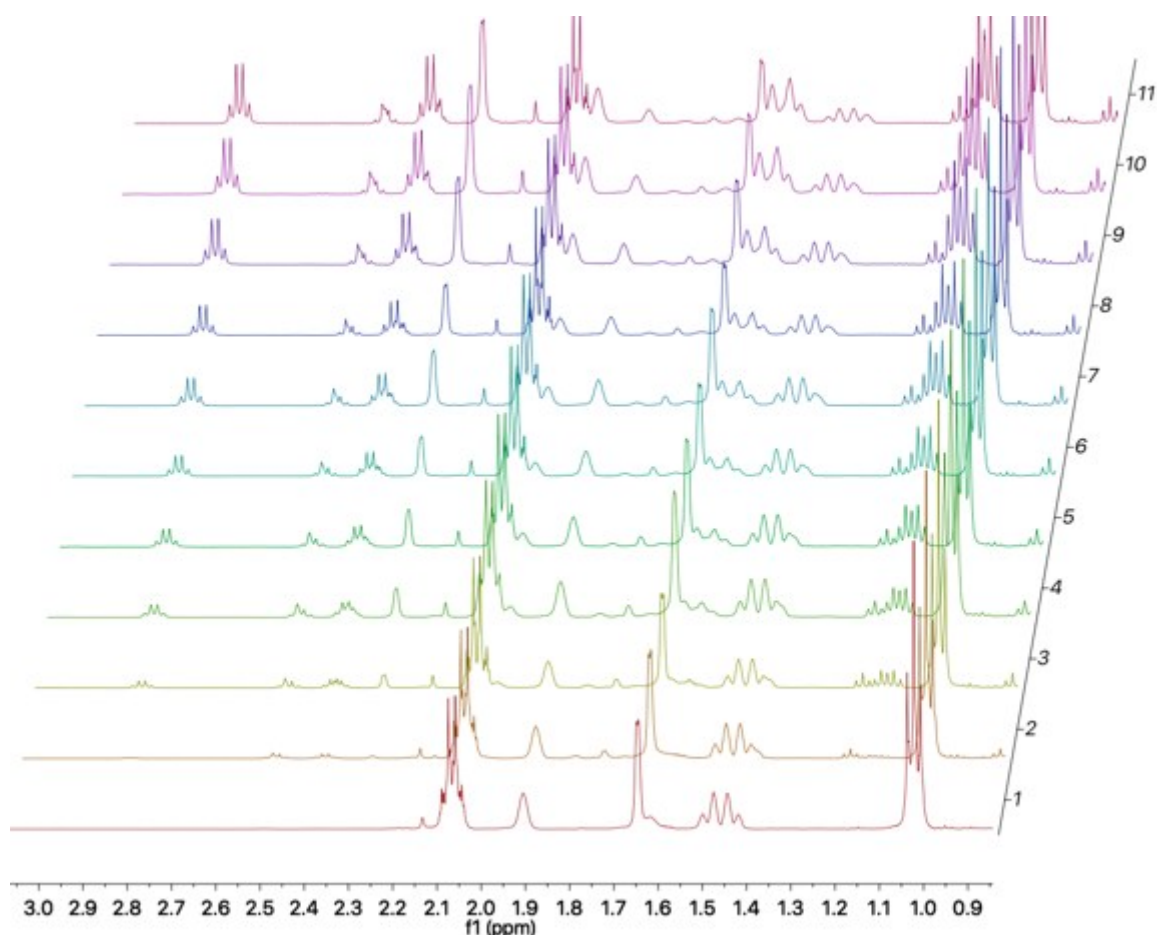

**Figure S112:** Zoom-in stacked  $^1\text{H}$  spectra of time points in the reaction of Sample B'.

**Table S9:** Concentrations and second order trapezoidal sum (with respect to alkyne) of time points of Sample B'.

| t    | AdN <sub>3</sub> |                     |                 |         |       | Pyrrole   |           | 2nd Order   | Sum         |
|------|------------------|---------------------|-----------------|---------|-------|-----------|-----------|-------------|-------------|
|      | (Raw Int)        | [AdN <sub>3</sub> ] | 3-Hex (Raw Int) | [3-hex] | [Cat] | (Raw Int) | [Pyrrole] | Trapezoidal | (Trapezoid) |
| 0    | 41.49            | 0.277               | 108.43          | 0.723   | 0.030 | 0         | 0         | 0           | 0           |
| 217  | 39.51            | 0.263               | 92.69           | 0.618   | 0.030 | 0.52      | 0.0052    | 97.528      | 97.528      |
| 724  | 34.95            | 0.233               | 88.14           | 0.588   | 0.030 | 3.05      | 0.0305    | 184.207     | 281.735     |
| 1121 | 32.26            | 0.215               | 82.52           | 0.550   | 0.030 | 4.69      | 0.0469    | 128.473     | 410.208     |
| 1697 | 29.06            | 0.194               | 76.79           | 0.512   | 0.030 | 6.55      | 0.0655    | 162.430     | 572.638     |
| 2163 | 27.28            | 0.182               | 73.85           | 0.492   | 0.030 | 7.65      | 0.0765    | 117.496     | 690.134     |
| 3019 | 24.56            | 0.164               | 68.94           | 0.460   | 0.030 | 9.5       | 0.095     | 193.922     | 884.056     |
| 3928 | 22.25            | 0.148               | 65.99           | 0.440   | 0.030 | 10.96     | 0.1096    | 183.882     | 1067.937    |
| 5549 | 18.39            | 0.123               | 57.81           | 0.385   | 0.030 | 13.1      | 0.131     | 276.046     | 1343.984    |
| 7785 | 15.06            | 0.100               | 52.43           | 0.350   | 0.030 | 14.82     | 0.1482    | 301.931     | 1645.915    |
| 9662 | 13.35            | 0.089               | 48.49           | 0.323   | 0.030 | 16.32     | 0.1632    | 212.411     | 1858.325    |

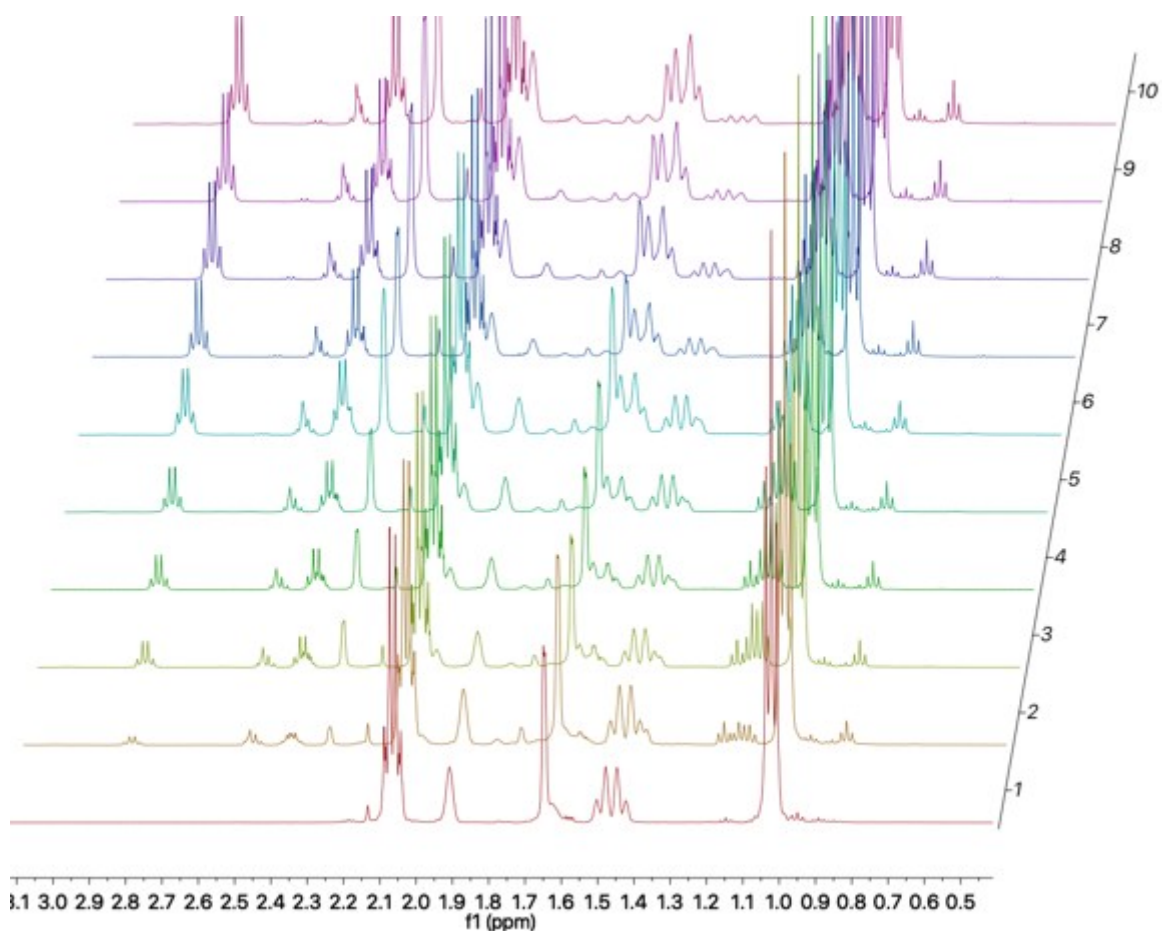

**Figure S113:** Zoom-in stacked  $^1\text{H}$  spectra of time points in the reaction of Sample C'.

**Table S10:** Concentrations and second order trapezoidal sum (with respect to alkyne) of time points of Sample C'.

| t    | AdN <sub>3</sub><br>(Raw Int) | [AdN <sub>3</sub> ] | 3-Hex (Raw<br>Int) | [3-Hex] | [Cat] | Pyrrole<br>(Raw Int) | [Pyrrole] | 2nd Order<br>Trapezoidal | Sum<br>(Trapezoid) |
|------|-------------------------------|---------------------|--------------------|---------|-------|----------------------|-----------|--------------------------|--------------------|
| 0    | 42.67                         | 0.284               | 145.75             | 0.972   | 0.030 | 0.00                 | 0.000     | 0.00                     | 0.00               |
| 271  | 35.69                         | 0.238               | 120.99             | 0.807   | 0.030 | 2.09                 | 0.021     | 214.24                   | 214.24             |
| 937  | 29.80                         | 0.199               | 107.94             | 0.720   | 0.030 | 6.76                 | 0.068     | 387.83                   | 602.07             |
| 1349 | 26.96                         | 0.180               | 101.78             | 0.679   | 0.030 | 8.77                 | 0.088     | 201.34                   | 803.41             |
| 1727 | 25.31                         | 0.169               | 98.21              | 0.655   | 0.030 | 10.11                | 0.101     | 167.98                   | 971.39             |
| 3153 | 21.06                         | 0.140               | 87.49              | 0.583   | 0.030 | 12.86                | 0.129     | 546.39                   | 1517.78            |
| 4779 | 16.84                         | 0.112               | 78.75              | 0.525   | 0.030 | 16.37                | 0.164     | 499.29                   | 2017.07            |
| 6055 | 14.36                         | 0.096               | 72.61              | 0.484   | 0.030 | 18.19                | 0.182     | 324.81                   | 2341.88            |
| 7393 | 12.58                         | 0.084               | 69.48              | 0.463   | 0.030 | 19.66                | 0.197     | 300.15                   | 2642.03            |
| 9001 | 11.50                         | 0.077               | 65.36              | 0.436   | 0.030 | 20.87                | 0.209     | 324.85                   | 2966.88            |

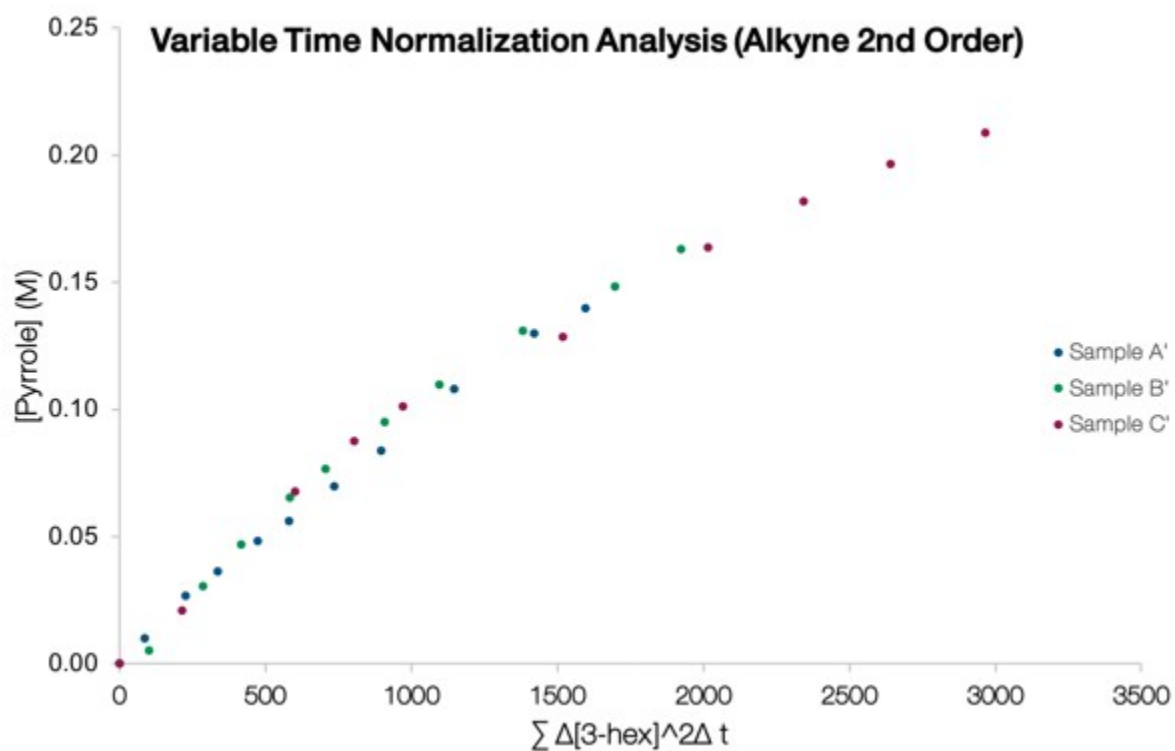

**Figure S114:** Concentration of pyrrole vs. time normalized for the concentration of 3-hexyne for Sample A' ( $[3\text{-hex}]_0 = 0.697 \text{ M}$ ), B' ( $[3\text{-hex}]_0 = 0.723 \text{ M}$ ), and C' ( $[3\text{-hex}]_0 = 0.972 \text{ M}$ ), showing 2<sup>nd</sup> order with respect to azide.

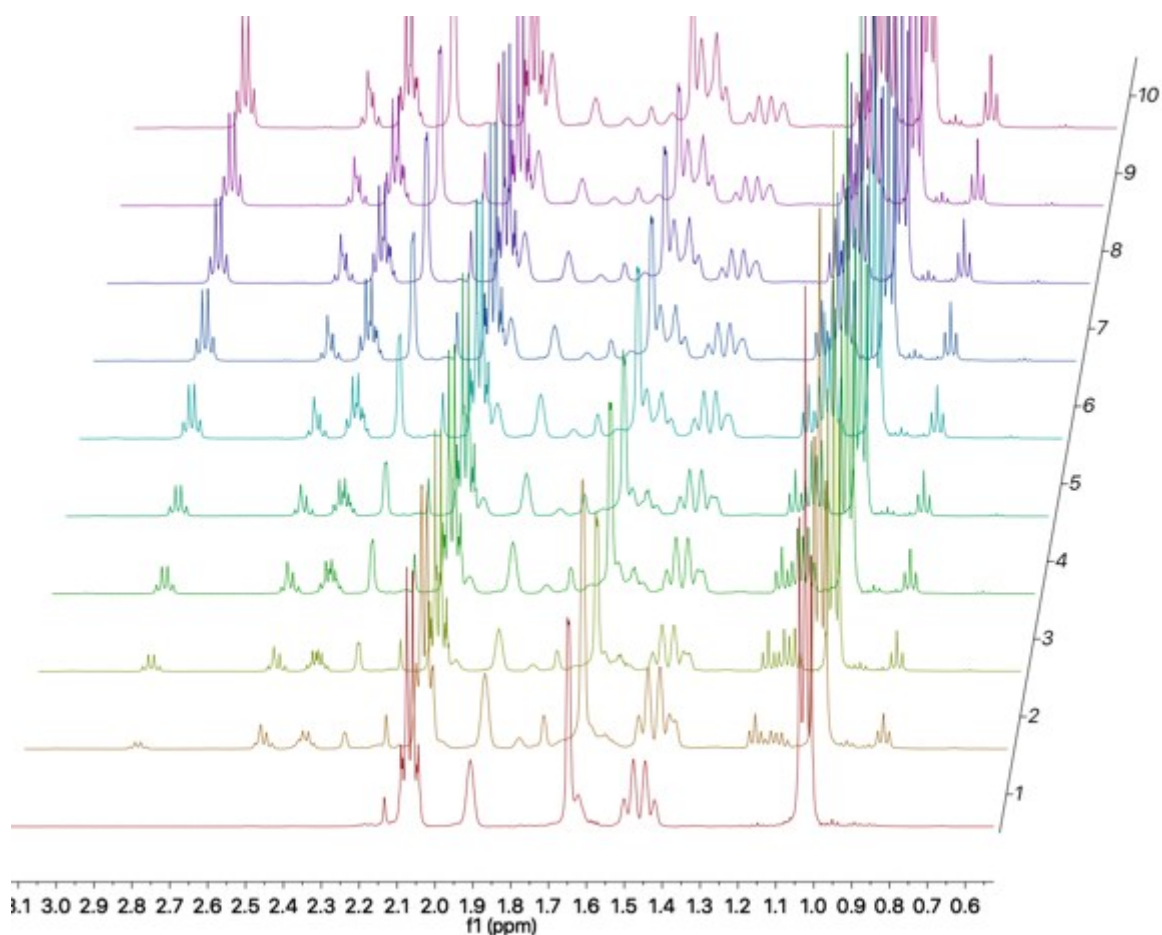

**Figure S115:** Zoom-in stacked  $^1\text{H}$  spectra of time points in the reaction of Sample D'.

Table S11: Concentrations and first order trapezoidal sum (with respect to catalyst) of time points of Sample D'.

| t    | Cat    | Pyrrole (Raw Int) | [Pyrrole] | First Order Trapezoidal |
|------|--------|-------------------|-----------|-------------------------|
| 0    | 0.0416 | 0                 | 0         | 0                       |
| 270  | 0.0416 | 1.37              | 0.0137    | 11.232                  |
| 690  | 0.0416 | 3.74              | 0.0374    | 28.704                  |
| 1121 | 0.0416 | 5.36              | 0.0536    | 46.634                  |
| 1534 | 0.0416 | 6.34              | 0.0634    | 63.814                  |
| 3091 | 0.0416 | 9.42              | 0.0942    | 128.586                 |
| 4600 | 0.0416 | 11.77             | 0.1177    | 191.360                 |
| 6040 | 0.0416 | 13.27             | 0.1327    | 251.264                 |
| 7338 | 0.0416 | 14.30             | 0.143     | 305.261                 |
| 9001 | 0.0416 | 15.22             | 0.1522    | 374.442                 |

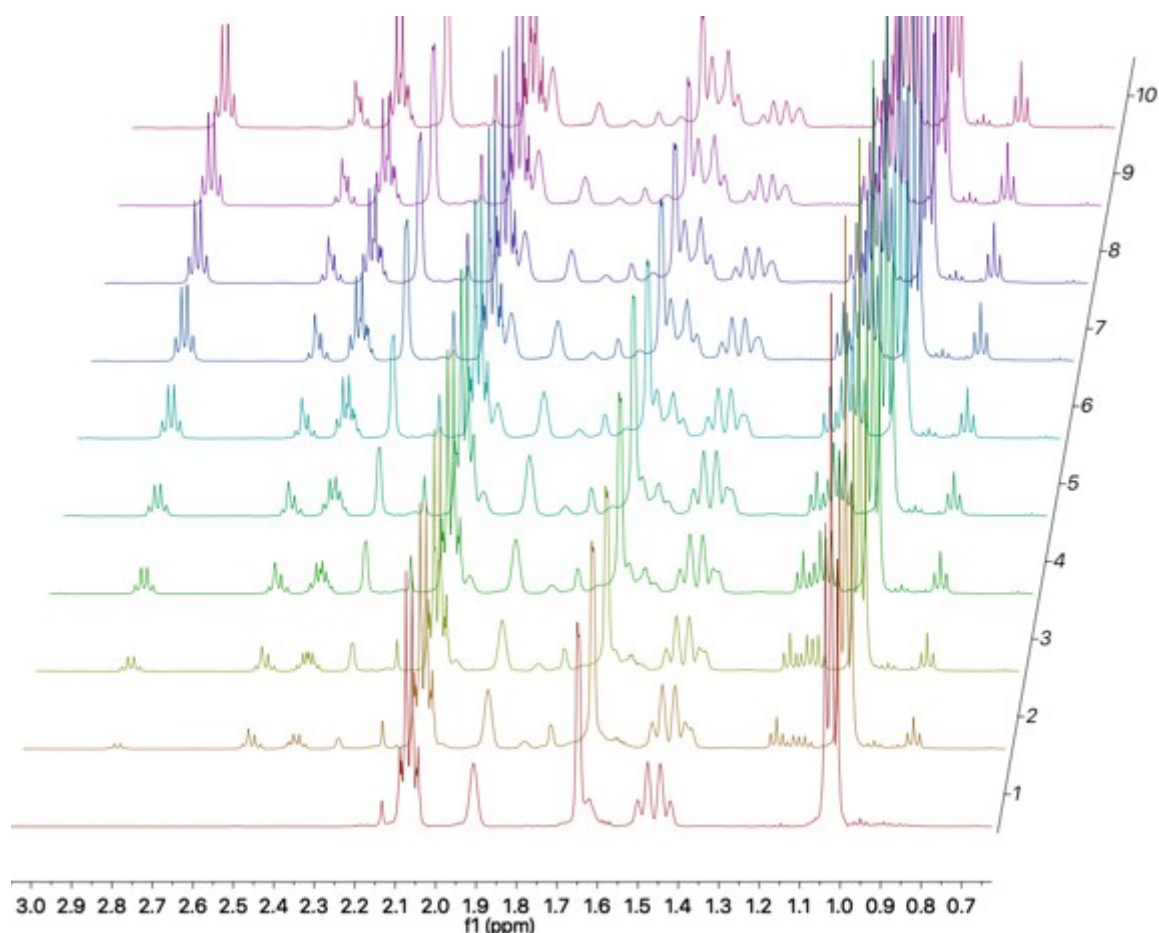

**Figure S116:** Zoom-in stacked  $^1\text{H}$  spectra of time points in the reaction of Sample E'.

**Table S12:** Concentrations and first order trapezoidal sum (with respect to catalyst) of time points of Sample E'.

| t    | Cat    | Pyrrole (Raw Int) | [Pyrrole] | First Order Trapezoidal |
|------|--------|-------------------|-----------|-------------------------|
| 0    | 0.0408 | 0                 | 0         | 0                       |
| 276  | 0.0408 | 1.15              | 0.0115    | 11.261                  |
| 799  | 0.0408 | 3.16              | 0.0316    | 32.599                  |
| 1181 | 0.0408 | 5.17              | 0.0517    | 48.185                  |
| 1591 | 0.0408 | 5.79              | 0.0579    | 64.913                  |
| 3126 | 0.0408 | 9.24              | 0.0924    | 127.541                 |
| 4560 | 0.0408 | 11.64             | 0.1164    | 186.048                 |
| 6005 | 0.0408 | 13.03             | 0.1303    | 245.004                 |
| 7262 | 0.0408 | 14.26             | 0.1426    | 296.290                 |
| 9005 | 0.0408 | 15.10             | 0.151     | 367.404                 |

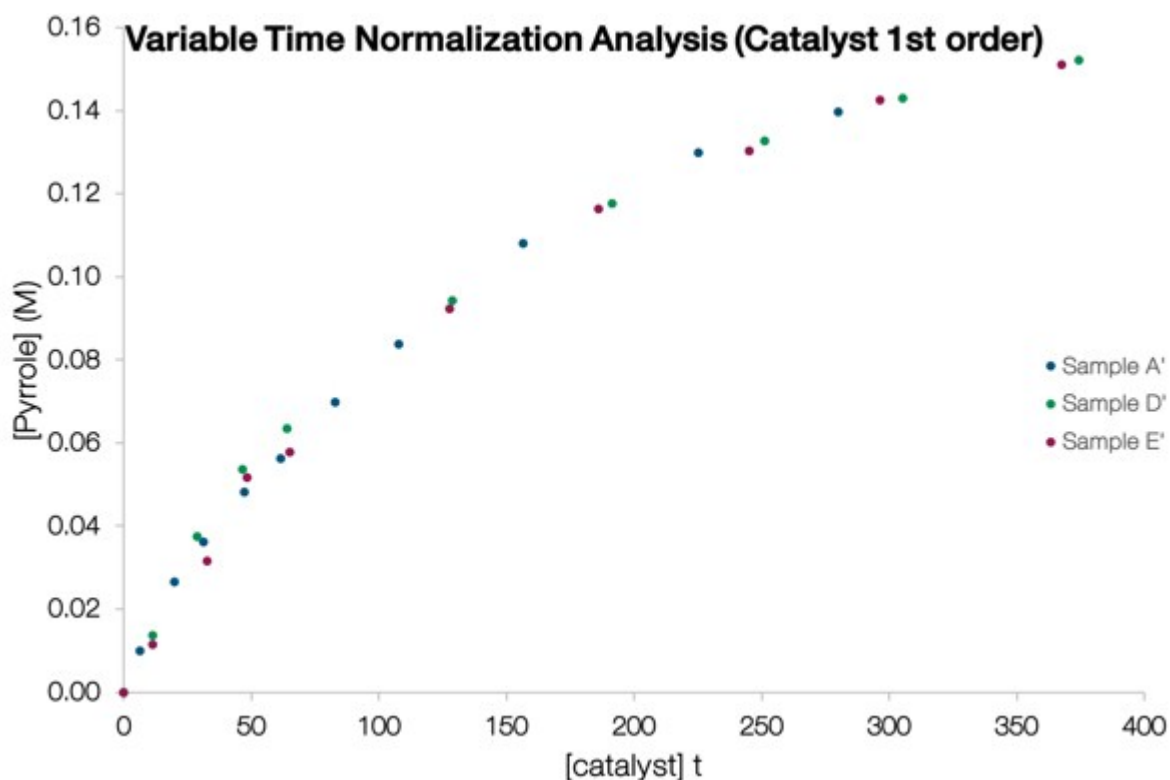

**Figure S117:** Concentration of pyrrole vs. time normalized for the concentration of 3-hexyne for Sample A' ( $[\text{Ti}]_0 = 0.030 \text{ M}$ ), D' ( $[\text{Ti}]_0 = 0.041 \text{ M}$ ), and E' ( $[\text{Ti}]_0 = 0.042 \text{ M}$ ), showing 1<sup>st</sup> order with respect to  $(\text{THF})_3\text{TiI}_2(\text{Ntol})$ .

### Initial Rates for $n\text{-decN}_3$ reaction with 3-hexyne

#### **Procedure**

To a screw cap NMR tube, a volume of each stock plus  $\text{C}_6\text{D}_5\text{Br}$  for dilution was added *via* syringe to a total of 0.5 mL. The mixtures were heated at  $115^\circ\text{C}$  for 120 seconds, and the reaction mixtures were analysed *in situ* by NMR.

#### **Stock solutions**

Azide ( $n\text{-decN}_3$ ) - Stock: 0.496 M  $\text{decN}_3$

Alkyne (3-hexyne) - Stock: 2.51 M 3-hexyne

Catalyst ( $(\text{THF})_3\text{TiI}_2(\text{Ntol})$ ) - Stock: 0.0493 M  $(\text{THF})_3\text{TiI}_2(\text{Ntol})$

$\text{Ph}_3\text{CH}$  Standard - Stock: 0.101 M  $\text{Ph}_3\text{CH}$

**Table S13:** Dilution table for the preparation of reaction mixtures A-G.

| Reaction | Standard (μL) | Azide (μL) | Alkyne (μL) | Catalyst (μL) | Dilution (μL) | Total (μL) |
|----------|---------------|------------|-------------|---------------|---------------|------------|
| A        | 100           | 100        | 100         | 100           | 100           | 500        |
| B        | 100           | 50         | 100         | 100           | 150           | 500        |
| C        | 100           | 150        | 100         | 100           | 50            | 500        |
| D        | 100           | 100        | 50          | 100           | 150           | 500        |
| E        | 100           | 100        | 150         | 100           | 50            | 500        |
| F        | 100           | 100        | 100         | 50            | 150           | 500        |
| G        | 100           | 100        | 100         | 150           | 50            | 500        |

**Table S14:** Initial concentrations of reagents and catalysts, and concentration of pyrrole product after 120 seconds for reaction mixtures A-G.

| Variable  | Reaction | [Azide] | [Alkyne] | [Catalyst] | [Standard] | pyrrole (int) | [pyrrole]    |
|-----------|----------|---------|----------|------------|------------|---------------|--------------|
| Basic Run | A        | 0.0992  | 0.502    | 0.00986    | 0.0202     | 5.32          | <b>0.027</b> |
| Azide     | B        | 0.0496  | 0.502    | 0.00986    | 0.0202     | 6.99          | <b>0.035</b> |
|           | C        | 0.149   | 0.502    | 0.00986    | 0.0202     | 4.68          | <b>0.024</b> |
| Alkyne    | D        | 0.0992  | 0.251    | 0.00986    | 0.0202     | 2.82          | <b>0.014</b> |
|           | E        | 0.0992  | 0.753    | 0.00986    | 0.0202     | 7.91          | <b>0.040</b> |
| Catalyst  | F        | 0.0992  | 0.502    | 0.00493    | 0.0202     | 3.43          | <b>0.017</b> |
|           | G        | 0.0992  | 0.502    | 0.0148     | 0.0202     | 6.63          | <b>0.033</b> |

**Table S15:** Ratio of initial concentrations of reagents and catalyst, and concentrations of pyrrole product after 120 seconds, compared to the ratio of the initial concentrations of reagents and catalyst raised to the power of best fit.

| Rxn/Rxn           | [Azide]/[Azide] | [Pyrrole]/[Pyrrole] | inverse half [azide]/[azide]     |
|-------------------|-----------------|---------------------|----------------------------------|
| A/B               | 2               | 0.761               | <b>0.707</b>                     |
| C/A               | 1.5             | 0.880               | <b>0.816</b>                     |
| C/B               | 3               | 0.670               | <b>0.577</b>                     |
| [Cat]/[Cat]       |                 |                     | half order [catalyst]/[catalyst] |
| A/F               | 2               | 1.55                | <b>1.41</b>                      |
| G/A               | 1.5             | 1.25                | <b>1.22</b>                      |
| G/F               | 3               | 1.93                | <b>1.73</b>                      |
| [Alkyne]/[Alkyne] |                 |                     |                                  |
| A/D               | 2               | 1.89                |                                  |
| E/A               | 1.5             | 1.49                |                                  |
| E/D               | 3               | 2.80                |                                  |

## References

1. Whitesides, G. M.; Ehmman, W. J. *J. Am. Chem. Soc.* **1970**, *92*, 5625-5640.
2. J. Blake, A.; E. Collier, P.; C. Dunn, S.; Li, W.-S.; Mountford, P.; V. Shishkin, O. *J. Chem. Soc., Dalton Trans.* **1997**, 1549-1558.
3. See, X. Y.; Beaumier, E. P.; Davis-Gilbert, Z. W.; Dunn, P. L.; Larsen, J. A.; Pearce, A. J.; Wheeler, T. A.; Tonks, I. A. *Organometallics* **2017**, *36*, 1383-1390.
4. Zhou, S.; Liao, H.; Liu, M.; Feng, G.; Fu, B.; Li, R.; Cheng, M.; Zhao, Y.; Gong, P. *Bioorg. Med. Chem.* **2014**, *22*, 6438-6452.
5. Gannarapu, M. R.; Vasamsetti, S. B.; Punna, N.; Kotamraju, S.; Banda, N. *MedChemComm* **2015**, *6*, 1494-1500.
6. Byeang Hyeon, K.; Sun Min, P. S. L., Yoon 2'-deoxyuridine derivatives and hydrogels formed therewith US 6884882 B1, Apr 26, 2005, 2005.
7. Goswami, P. P.; Suding, V. P.; Carlson, A. S.; Topczewski, J. J. *Eur. J. Org. Chem.* **2016**, *2016*, 4805-4809.
8. Zhang, S.-L.; Xue, Z.-F.; Gao, Y.-R.; Mao, S.; Wang, Y.-Q. *Tetrahedron Lett.* **2012**, *53*, 2436-2439.
9. Rassadin, V. A.; Nicolas, E.; Six, Y. *Chem. Commun.* **2014**, *50*, 7666-7669.
10. (a) Burés, J. *Angew. Chem. Int. Ed. Engl.* **2016**, *55*, 2028-2031; (b) Burés, J. *Angew. Chem. Int. Ed. Engl.* **2016**, *55*, 16084-16087.
